# Supplementary material for: Characterization of Accessible Chromatin Regions in Cattle Rumen Epithelial Tissue during Weaning
Source: MDPI journal article supplement (doi:10.3390/genes13030535), 2022-03-18
Supplement: s1 [file s1]

# i-cisTarget

An integrative genomics method for the prediction of regulatory features and cis-regulatory modules.

## Parameters and statistics for clab4

|                                                   |                                               |
|---------------------------------------------------|-----------------------------------------------|
| Number of features                                | 29890                                         |
| Number of enriched features (NES > 3.0)           | 512                                           |
| Total number of ranked regions                    | 1223024                                       |
| Type of input query                               | bed                                           |
| Number of <b>i-cisTarget</b> regions in input set | 2192 ( <b>Results of the region mapping</b> ) |
| Minimum fraction of overlap                       | 0.4                                           |
| Normalized enrichment score (NES) threshold       | 3.0                                           |
| AUC threshold (fraction / # of ranked regions)    | 0.005 (6115)                                  |
| Recovery curve threshold (# of regions)           | 20000                                         |

AUC distribution

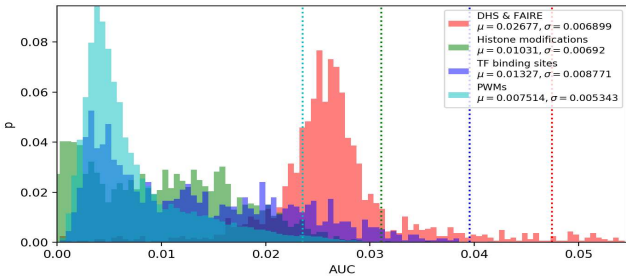

Recovery of best feature

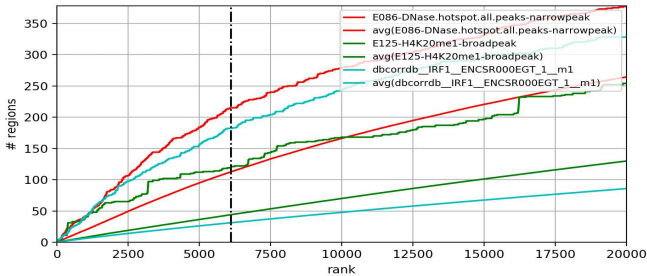

## Results for clab4

Select features in the table below, select an operation and [proceed](#).

- ☐ Use candidate target regions as **filter** and use as input for i-cisTarget again.
- ☐ **Scan** candidate target regions of selected features for [multiple homotypic](#) CRMs.
- ☐ **Create SIF file** for the selected features.

This report is also available as an [archive](#).

For some databases, randomly generated features were enriched. Also, non-random features in these same databases that have a lower enrichment than the first randomly generated enriched feature were removed from the report. The involved databases and their adjusted NES thresholds are: TF binding sites (3.00000).

| # | Feature                                                                                                                     | NES     | Logo | Recovery Curve | Candidate targets    | All regions in top 20000 | Database |
|---|-----------------------------------------------------------------------------------------------------------------------------|---------|------|----------------|----------------------|--------------------------|----------|
| 1 | <input type="checkbox"/> dbcorrdB_IRF1_ENCSR000EGT_1_m1<br>Description: IRF1 (ENCSR000EGT-1, motif 1)<br>Possible TFs: IRF1 | 7.45770 |      |                | <a href="#">link</a> | <a href="#">link</a>     | PWMs     |
| 2 | <input type="checkbox"/> homer_GGCCCCGCCCCC_Sp1<br>Description: Sp1(Zf)/Promoter/Homer                                      | 6.89365 |      |                | <a href="#">link</a> | <a href="#">link</a>     | PWMs     |
| 3 | <input type="checkbox"/> dbcorrdB_NFYB_ENCSR000DNM_1_m2<br>Description: NFYB (ENCSR000DNM-1, motif 2)<br>Possible TFs: NFYB | 6.45966 |      |                | <a href="#">link</a> | <a href="#">link</a>     | PWMs     |

|    |                                                                                                                                                                                                                                                                                                                                                                                                                                                                                                                                                                                                                                                                                                                                                                                                                                                                                                                                                                                                                                                                                                                                                                                                                                                                                                                                                                                                                                                                                                                                                                                                                                                                                                                                                                                                                                                                                                                                                                                                                                      | All     |                                                                                     |                                                                                       | Candidate regions in top 20000 | Database |
|----|--------------------------------------------------------------------------------------------------------------------------------------------------------------------------------------------------------------------------------------------------------------------------------------------------------------------------------------------------------------------------------------------------------------------------------------------------------------------------------------------------------------------------------------------------------------------------------------------------------------------------------------------------------------------------------------------------------------------------------------------------------------------------------------------------------------------------------------------------------------------------------------------------------------------------------------------------------------------------------------------------------------------------------------------------------------------------------------------------------------------------------------------------------------------------------------------------------------------------------------------------------------------------------------------------------------------------------------------------------------------------------------------------------------------------------------------------------------------------------------------------------------------------------------------------------------------------------------------------------------------------------------------------------------------------------------------------------------------------------------------------------------------------------------------------------------------------------------------------------------------------------------------------------------------------------------------------------------------------------------------------------------------------------------|---------|-------------------------------------------------------------------------------------|---------------------------------------------------------------------------------------|--------------------------------|----------|
| #  | Feature                                                                                                                                                                                                                                                                                                                                                                                                                                                                                                                                                                                                                                                                                                                                                                                                                                                                                                                                                                                                                                                                                                                                                                                                                                                                                                                                                                                                                                                                                                                                                                                                                                                                                                                                                                                                                                                                                                                                                                                                                              | NES     | Logo                                                                                | Recovery Curve                                                                        |                                |          |
| 4  | <div><input type="checkbox"/> dbcorrdB__FOS__ENCSR000FAI_1__m2</div> <div>Description: FOS (ENCSR000FAI-1, motif 2)</div> <div>Possible TFs: FOS</div>                                                                                                                                                                                                                                                                                                                                                                                                                                                                                                                                                                                                                                                                                                                                                                                                                                                                                                                                                                                                                                                                                                                                                                                                                                                                                                                                                                                                                                                                                                                                                                                                                                                                                                                                                                                                                                                                               | 6.45612 | 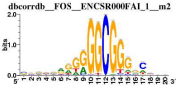   |    | <a href="#">link</a>           | PWMs     |
| 5  | <div><input type="checkbox"/> hocomoco__SP1_HUMAN.H11MO.1.A</div> <div>Description: SP1_HUMAN</div> <div>Possible TFs: SP1</div>                                                                                                                                                                                                                                                                                                                                                                                                                                                                                                                                                                                                                                                                                                                                                                                                                                                                                                                                                                                                                                                                                                                                                                                                                                                                                                                                                                                                                                                                                                                                                                                                                                                                                                                                                                                                                                                                                                     | 6.44868 |    |    | <a href="#">link</a>           | PWMs     |
| 6  | <div><input type="checkbox"/> dbcorrdB__NFYA__ENCSR000EGR_1__m2</div> <div>Description: NFYA (ENCSR000EGR-1, motif 2)</div> <div>Possible TFs: NFYA</div>                                                                                                                                                                                                                                                                                                                                                                                                                                                                                                                                                                                                                                                                                                                                                                                                                                                                                                                                                                                                                                                                                                                                                                                                                                                                                                                                                                                                                                                                                                                                                                                                                                                                                                                                                                                                                                                                            | 6.44724 |    |    | <a href="#">link</a>           | PWMs     |
| 7  | <div><input type="checkbox"/> dbcorrdB__SP1__ENCSR000BHK_1__m2</div> <div>Description: SP1 (ENCSR000BHK-1, motif 2)</div> <div>Possible TFs: SP1</div>                                                                                                                                                                                                                                                                                                                                                                                                                                                                                                                                                                                                                                                                                                                                                                                                                                                                                                                                                                                                                                                                                                                                                                                                                                                                                                                                                                                                                                                                                                                                                                                                                                                                                                                                                                                                                                                                               | 6.41714 |    |    | <a href="#">link</a>           | PWMs     |
| 8  | <div><input type="checkbox"/> dbcorrdB__PBX3__ENCSR000BGR_1__m3</div> <div>Description: PBX3 (ENCSR000BGR-1, motif 3)</div> <div>Possible TFs: PBX3</div>                                                                                                                                                                                                                                                                                                                                                                                                                                                                                                                                                                                                                                                                                                                                                                                                                                                                                                                                                                                                                                                                                                                                                                                                                                                                                                                                                                                                                                                                                                                                                                                                                                                                                                                                                                                                                                                                            | 6.40358 |    |    | <a href="#">link</a>           | PWMs     |
| 9  | <div><input type="checkbox"/> factorbook__SP1</div> <div>Description: SP1</div> <div>Possible TFs: SP1, SP2</div>                                                                                                                                                                                                                                                                                                                                                                                                                                                                                                                                                                                                                                                                                                                                                                                                                                                                                                                                                                                                                                                                                                                                                                                                                                                                                                                                                                                                                                                                                                                                                                                                                                                                                                                                                                                                                                                                                                                    | 6.16652 |    |    | <a href="#">link</a>           | PWMs     |
| 10 | <div><input type="checkbox"/> flyfactorsurvey__CG5669_SOLEXA_5_FBgn0039169</div> <div>Description: CG5669_SOLEXA_5_FBgn0039169</div> <div>Possible TFs: SP1, SP2, SP3, SP4</div>                                                                                                                                                                                                                                                                                                                                                                                                                                                                                                                                                                                                                                                                                                                                                                                                                                                                                                                                                                                                                                                                                                                                                                                                                                                                                                                                                                                                                                                                                                                                                                                                                                                                                                                                                                                                                                                     | 6.13867 |  |  | <a href="#">link</a>           | PWMs     |
| 11 | <div><input type="checkbox"/> cisbp__M4871</div> <div>Description: CG5669[<i>gene ID</i>: "FBgn0039169" <i>species</i>: "Drosophila melanogaster" <i>TF status</i>: "direct" <i>TF family</i>: "C2H2 ZF" <i>DBDs</i>: "zf-C2H2"]; SP5[<i>gene ID</i>: "ENSG00000204335" <i>species</i>: "Homo sapiens" <i>TF status</i>: "inferred" <i>TF family</i>: "C2H2 ZF" <i>DBDs</i>: "zf-C2H2"]; SP6[<i>gene ID</i>: "ENSG00000189120" <i>species</i>: "Homo sapiens" <i>TF status</i>: "inferred" <i>TF family</i>: "C2H2 ZF" <i>DBDs</i>: "zf-C2H2"]; SP7[<i>gene ID</i>: "ENSG00000170374" <i>species</i>: "Homo sapiens" <i>TF status</i>: "inferred" <i>TF family</i>: "C2H2 ZF" <i>DBDs</i>: "zf-C2H2"]; SP9[<i>gene ID</i>: "ENSG00000217236" <i>species</i>: "Homo sapiens" <i>TF status</i>: "inferred" <i>TF family</i>: "C2H2 ZF" <i>DBDs</i>: "zf-C2H2"]; SP2[<i>gene ID</i>: "ENSMUSG00000018678" <i>species</i>: "Mus musculus" <i>TF status</i>: "inferred" <i>TF family</i>: "C2H2 ZF" <i>DBDs</i>: "zf-C2H2"]; SP3[<i>gene ID</i>: "ENSMUSG00000027109" <i>species</i>: "Mus musculus" <i>TF status</i>: "inferred" <i>TF family</i>: "C2H2 ZF" <i>DBDs</i>: "zf-C2H2"]; SP5[<i>gene ID</i>: "ENSMUSG00000075304" <i>species</i>: "Mus musculus" <i>TF status</i>: "inferred" <i>TF family</i>: "C2H2 ZF" <i>DBDs</i>: "zf-C2H2"]; SP6[<i>gene ID</i>: "ENSMUSG00000038560" <i>species</i>: "Mus musculus" <i>TF status</i>: "inferred" <i>TF family</i>: "C2H2 ZF" <i>DBDs</i>: "zf-C2H2"]; SP7[<i>gene ID</i>: "ENSMUSG00000060284" <i>species</i>: "Mus musculus" <i>TF status</i>: "inferred" <i>TF family</i>: "C2H2 ZF" <i>DBDs</i>: "zf-C2H2"]; SP8[<i>gene ID</i>: "ENSMUSG00000048562" <i>species</i>: "Mus musculus" <i>TF status</i>: "inferred" <i>TF family</i>: "C2H2 ZF" <i>DBDs</i>: "zf-C2H2"]; SP9[<i>gene ID</i>: "ENSMUSG00000068859" <i>species</i>: "Mus musculus" <i>TF status</i>: "inferred" <i>TF family</i>: "C2H2 ZF" <i>DBDs</i>: "zf-C2H2"]</div> <div>Possible TFs: SP1, SP2, SP3, SP4</div> | 6.01825 |  |  | <a href="#">link</a>           | PWMs     |

| # Feature |                                                                                                                                                                                | NES     | Logo | Recovery Curve | Candidate targets    | All regions in top 20000 | Database |
|-----------|--------------------------------------------------------------------------------------------------------------------------------------------------------------------------------|---------|------|----------------|----------------------|--------------------------|----------|
| 12        | <div><input type="checkbox"/> dbcorrd_b__NFYA__ENCSR000DNS_1__m2</div> <div>Description: NFYA (ENCSR000DNS-1, motif 2)</div> <div>Possible TFs: NFYA</div>                     | 5.95460 |      |                | <a href="#">link</a> | <a href="#">link</a>     | PWMs     |
| 13        | <div><input type="checkbox"/> dbcorrd_b__STAT1__ENCSR000DZM_1__m3</div> <div>Description: STAT1 (ENCSR000DZM-1, motif 3)</div> <div>Possible TFs: STAT1</div>                  | 5.81373 |      |                | <a href="#">link</a> | <a href="#">link</a>     | PWMs     |
| 14        | <div><input type="checkbox"/> taipale__SP4_full_NWRGCCMCGCCCMCTNN</div> <div>Description: SP4 monomeric C2H2 full</div> <div>Possible TFs: SP4</div>                           | 5.76850 |      |                | <a href="#">link</a> | <a href="#">link</a>     | PWMs     |
| 15        | <div><input type="checkbox"/> dbcorrd_b__FOS__ENCSR000EYZ_1__m2</div> <div>Description: FOS (ENCSR000EYZ-1, motif 2)</div> <div>Possible TFs: FOS</div>                        | 5.76815 |      |                | <a href="#">link</a> | <a href="#">link</a>     | PWMs     |
| 16        | <div><input type="checkbox"/> dbcorrd_b__NFYB__ENCSR000DNR_1__m2</div> <div>Description: NFYB (ENCSR000DNR-1, motif 2)</div> <div>Possible TFs: NFYB</div>                     | 5.66135 |      |                | <a href="#">link</a> | <a href="#">link</a>     | PWMs     |
| 17        | <div><input type="checkbox"/> hocomoco__SP1_HUMAN.H11MO.0.A</div> <div>Description: SP1_HUMAN</div> <div>Possible TFs: SP1</div>                                               | 5.65861 |      |                | <a href="#">link</a> | <a href="#">link</a>     | PWMs     |
| 18        | <div><input type="checkbox"/> taipale_cyt_meth__KLF15_NCCMCGCCCMYN_FL_meth</div> <div>Description: KLF15 [Znf_C2H2, CpG-meth]</div> <div>Possible TFs: KLF15</div>             | 5.58215 |      |                | <a href="#">link</a> | <a href="#">link</a>     | PWMs     |
| 19        | <div><input type="checkbox"/> swissregulon__hs__SP1.p2</div> <div>Description: hs__SP1.p2</div> <div>Possible TFs: SP1</div>                                                   | 5.48627 |      |                | <a href="#">link</a> | <a href="#">link</a>     | PWMs     |
| 20        | <div><input type="checkbox"/> dbcorrd_b__ATF3__ENCSR000DOG_1__m1</div> <div>Description: ATF3 (ENCSR000DOG-1, motif 1)</div> <div>Possible TFs: ATF3</div>                     | 5.47379 |      |                | <a href="#">link</a> | <a href="#">link</a>     | PWMs     |
| 21        | <div><input type="checkbox"/> hocomoco__KLF12_HUMAN.H11MO.0.C</div> <div>Description: KLF12_HUMAN</div> <div>Possible TFs: KLF12</div>                                         | 5.38024 |      |                | <a href="#">link</a> | <a href="#">link</a>     | PWMs     |
| 22        | <div><input type="checkbox"/> taipale_cyt_meth__SP1_NWRGCCACGCCCMYN_eDBD</div> <div>Description: SP1 [Znf_C2H2]</div> <div>Possible TFs: SP1</div>                             | 5.33642 |      |                | <a href="#">link</a> | <a href="#">link</a>     | PWMs     |
| 23        | <div><input type="checkbox"/> transfac_pro__M04744</div> <div>Description: V\$ATF3_Q2: ATF-3</div> <div>Possible TFs: ATF3</div>                                               | 5.33428 |      |                | <a href="#">link</a> | <a href="#">link</a>     | PWMs     |
| 24        | <div><input type="checkbox"/> flyfactorsurvey__Sp1_SOLEXA_2.5_FBgn0020378</div> <div>Description: Sp1_SOLEXA_2.5_FBgn0020378</div> <div>Possible TFs: SP8, SP9, SP6, SP7</div> | 5.29264 |      |                | <a href="#">link</a> | <a href="#">link</a>     | PWMs     |

|    |                                                                                                                                                                                                                                                                                                                                                                                                                                                                                                                                                                                                                                                                                                                                                                                                                                                                                                                                                                                                                                                                                                                                                                                                                                                                                                                                                                                                                                                                                                                                                                                                                                                                                                                                                                                                                                                                                                                                                                                                                                                                                                                                                                                                                                                                                                    | All                                                                                                                                                                                                                                                                                                                                                                                                                                                                                                                                                                                                                                                                                                                                                                                                                                                                                                                                                                                                                                                                                                                                                                                                                                                                                                                                                                                                                                                                                                                                                                                                                                                                                                                                                                                                                                                                                                                                                                                                                                                                                                                                                                                                                                                                                                                          |      |                | Candidate regions |              | Database |
|----|----------------------------------------------------------------------------------------------------------------------------------------------------------------------------------------------------------------------------------------------------------------------------------------------------------------------------------------------------------------------------------------------------------------------------------------------------------------------------------------------------------------------------------------------------------------------------------------------------------------------------------------------------------------------------------------------------------------------------------------------------------------------------------------------------------------------------------------------------------------------------------------------------------------------------------------------------------------------------------------------------------------------------------------------------------------------------------------------------------------------------------------------------------------------------------------------------------------------------------------------------------------------------------------------------------------------------------------------------------------------------------------------------------------------------------------------------------------------------------------------------------------------------------------------------------------------------------------------------------------------------------------------------------------------------------------------------------------------------------------------------------------------------------------------------------------------------------------------------------------------------------------------------------------------------------------------------------------------------------------------------------------------------------------------------------------------------------------------------------------------------------------------------------------------------------------------------------------------------------------------------------------------------------------------------|------------------------------------------------------------------------------------------------------------------------------------------------------------------------------------------------------------------------------------------------------------------------------------------------------------------------------------------------------------------------------------------------------------------------------------------------------------------------------------------------------------------------------------------------------------------------------------------------------------------------------------------------------------------------------------------------------------------------------------------------------------------------------------------------------------------------------------------------------------------------------------------------------------------------------------------------------------------------------------------------------------------------------------------------------------------------------------------------------------------------------------------------------------------------------------------------------------------------------------------------------------------------------------------------------------------------------------------------------------------------------------------------------------------------------------------------------------------------------------------------------------------------------------------------------------------------------------------------------------------------------------------------------------------------------------------------------------------------------------------------------------------------------------------------------------------------------------------------------------------------------------------------------------------------------------------------------------------------------------------------------------------------------------------------------------------------------------------------------------------------------------------------------------------------------------------------------------------------------------------------------------------------------------------------------------------------------|------|----------------|-------------------|--------------|----------|
| #  | Feature                                                                                                                                                                                                                                                                                                                                                                                                                                                                                                                                                                                                                                                                                                                                                                                                                                                                                                                                                                                                                                                                                                                                                                                                                                                                                                                                                                                                                                                                                                                                                                                                                                                                                                                                                                                                                                                                                                                                                                                                                                                                                                                                                                                                                                                                                            | NES                                                                                                                                                                                                                                                                                                                                                                                                                                                                                                                                                                                                                                                                                                                                                                                                                                                                                                                                                                                                                                                                                                                                                                                                                                                                                                                                                                                                                                                                                                                                                                                                                                                                                                                                                                                                                                                                                                                                                                                                                                                                                                                                                                                                                                                                                                                          | Logo | Recovery Curve | targets           | in top 20000 |          |
| 25 | <div><input type="checkbox"/> cisbp__M5855</div> <div>Description: SP4[<b>gene ID:</b> "ENSG00000105866" <b>species:</b> "Homo sapiens" <b>TF status:</b> "direct" <b>TF family:</b> "C2H2 ZF" <b>DBDs:</b> "zf-C2H2"]; SP5[<b>gene ID:</b> "ENSG00000204335" <b>species:</b> "Homo sapiens" <b>TF status:</b> "inferred" <b>TF family:</b> "C2H2 ZF" <b>DBDs:</b> "zf-C2H2"]; SP6[<b>gene ID:</b> "ENSG00000189120" <b>species:</b> "Homo sapiens" <b>TF status:</b> "inferred" <b>TF family:</b> "C2H2 ZF" <b>DBDs:</b> "zf-C2H2"]; SP7[<b>gene ID:</b> "ENSG00000170374" <b>species:</b> "Homo sapiens" <b>TF status:</b> "inferred" <b>TF family:</b> "C2H2 ZF" <b>DBDs:</b> "zf-C2H2"]; SP9[<b>gene ID:</b> "ENSG00000217236" <b>species:</b> "Homo sapiens" <b>TF status:</b> "inferred" <b>TF family:</b> "C2H2 ZF" <b>DBDs:</b> "zf-C2H2"]; Sp2[<b>gene ID:</b> "ENSMUSG00000018678" <b>species:</b> "Mus musculus" <b>TF status:</b> "inferred" <b>TF family:</b> "C2H2 ZF" <b>DBDs:</b> "zf-C2H2"]; Sp3[<b>gene ID:</b> "ENSMUSG00000027109" <b>species:</b> "Mus musculus" <b>TF status:</b> "inferred" <b>TF family:</b> "C2H2 ZF" <b>DBDs:</b> "zf-C2H2"]; Sp5[<b>gene ID:</b> "ENSMUSG00000075304" <b>species:</b> "Mus musculus" <b>TF status:</b> "inferred" <b>TF family:</b> "C2H2 ZF" <b>DBDs:</b> "zf-C2H2"]; Sp6[<b>gene ID:</b> "ENSMUSG00000038560" <b>species:</b> "Mus musculus" <b>TF status:</b> "inferred" <b>TF family:</b> "C2H2 ZF" <b>DBDs:</b> "zf-C2H2"]; Sp7[<b>gene ID:</b> "ENSMUSG00000060284" <b>species:</b> "Mus musculus" <b>TF status:</b> "inferred" <b>TF family:</b> "C2H2 ZF" <b>DBDs:</b> "zf-C2H2"]; Sp8[<b>gene ID:</b> "ENSMUSG00000048562" <b>species:</b> "Mus musculus" <b>TF status:</b> "inferred" <b>TF family:</b> "C2H2 ZF" <b>DBDs:</b> "zf-C2H2"]; Sp9[<b>gene ID:</b> "ENSMUSG00000068859" <b>species:</b> "Mus musculus" <b>TF status:</b> "inferred" <b>TF family:</b> "C2H2 ZF" <b>DBDs:</b> "zf-C2H2"]<br/>Possible TFs: SP4</div> <div>5.26463</div> <div>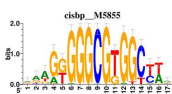</div> <div></div> <div><a href="#">link</a></div> <div><a href="#">link</a></div> <div>PWMs</div> |                                                                                                                                                                                                                                                                                                                                                                                                                                                                                                                                                                                                                                                                                                                                                                                                                                                                                                                                                                                                                                                                                                                                                                                                                                                                                                                                                                                                                                                                                                                                                                                                                                                                                                                                                                                                                                                                                                                                                                                                                                                                                                                                                                                                                                                                                                                              |      |                |                   |              |          |
|    | 26                                                                                                                                                                                                                                                                                                                                                                                                                                                                                                                                                                                                                                                                                                                                                                                                                                                                                                                                                                                                                                                                                                                                                                                                                                                                                                                                                                                                                                                                                                                                                                                                                                                                                                                                                                                                                                                                                                                                                                                                                                                                                                                                                                                                                                                                                                 | <div><input type="checkbox"/> predrem__nrMotif1714</div> <div>Description: 268_HCM-DS12599.M32</div> <div>5.24944</div> <div></div> <div></div> <div><a href="#">link</a></div> <div><a href="#">link</a></div> <div>PWMs</div>                                                                                                                                                                                                                                                                                                                                                                                                                                                                                                                                                                                                                                                                                                                                                                                                                                                                                                                                                                                                                                                                                                                                                                                                                                                                                                                                                                                                                                                                                                                                                                                                                                                                                                                                                                                                                                                                                                                       |      |                |                   |              |          |
| 27 |                                                                                                                                                                                                                                                                                                                                                                                                                                                                                                                                                                                                                                                                                                                                                                                                                                                                                                                                                                                                                                                                                                                                                                                                                                                                                                                                                                                                                                                                                                                                                                                                                                                                                                                                                                                                                                                                                                                                                                                                                                                                                                                                                                                                                                                                                                    | <div><input type="checkbox"/> cisbp__M5210</div> <div>Description: SP5[<b>gene ID:</b> "ENSG00000204335" <b>species:</b> "Homo sapiens" <b>TF status:</b> "inferred" <b>TF family:</b> "C2H2 ZF" <b>DBDs:</b> "zf-C2H2"]; SP6[<b>gene ID:</b> "ENSG00000189120" <b>species:</b> "Homo sapiens" <b>TF status:</b> "inferred" <b>TF family:</b> "C2H2 ZF" <b>DBDs:</b> "zf-C2H2"]; SP7[<b>gene ID:</b> "ENSG00000170374" <b>species:</b> "Homo sapiens" <b>TF status:</b> "inferred" <b>TF family:</b> "C2H2 ZF" <b>DBDs:</b> "zf-C2H2"]; SP9[<b>gene ID:</b> "ENSG00000217236" <b>species:</b> "Homo sapiens" <b>TF status:</b> "inferred" <b>TF family:</b> "C2H2 ZF" <b>DBDs:</b> "zf-C2H2"]; SP1[<b>gene ID:</b> "FBgn0020378" <b>species:</b> "Drosophila melanogaster" <b>TF status:</b> "direct" <b>TF family:</b> "C2H2 ZF" <b>DBDs:</b> "zf-C2H2"]; SP2[<b>gene ID:</b> "ENSMUSG00000018678" <b>species:</b> "Mus musculus" <b>TF status:</b> "inferred" <b>TF family:</b> "C2H2 ZF" <b>DBDs:</b> "zf-C2H2"]; Sp3[<b>gene ID:</b> "ENSMUSG00000027109" <b>species:</b> "Mus musculus" <b>TF status:</b> "inferred" <b>TF family:</b> "C2H2 ZF" <b>DBDs:</b> "zf-C2H2"]; Sp5[<b>gene ID:</b> "ENSMUSG00000075304" <b>species:</b> "Mus musculus" <b>TF status:</b> "inferred" <b>TF family:</b> "C2H2 ZF" <b>DBDs:</b> "zf-C2H2"]; Sp6[<b>gene ID:</b> "ENSMUSG00000038560" <b>species:</b> "Mus musculus" <b>TF status:</b> "inferred" <b>TF family:</b> "C2H2 ZF" <b>DBDs:</b> "zf-C2H2"]; Sp7[<b>gene ID:</b> "ENSMUSG00000060284" <b>species:</b> "Mus musculus" <b>TF status:</b> "inferred" <b>TF family:</b> "C2H2 ZF" <b>DBDs:</b> "zf-C2H2"]; Sp8[<b>gene ID:</b> "ENSMUSG00000048562" <b>species:</b> "Mus musculus" <b>TF status:</b> "inferred" <b>TF family:</b> "C2H2 ZF" <b>DBDs:</b> "zf-C2H2"]; Sp9[<b>gene ID:</b> "ENSMUSG00000068859" <b>species:</b> "Mus musculus" <b>TF status:</b> "inferred" <b>TF family:</b> "C2H2 ZF" <b>DBDs:</b> "zf-C2H2"]<br/>Possible TFs: SP8, SP9, SP6, SP7</div> <div>5.20966</div> <div></div> <div></div> <div><a href="#">link</a></div> <div><a href="#">link</a></div> <div>PWMs</div> |      |                |                   |              |          |



| #  | Feature                                                                                                                                                                                                                                                                                                                                                                                                                                                                                                                                                                                                                                                                                                                                                                                                                                                                                                                                                                                                                                                                                                                                                                                                                                                                                                                                                                                                                                                                                                                                                                                                                                                                                                                                                                                                                                                                                                                                                                                                                             | NES     | Logo                                                                                | Recovery Curve                                                                        | Candidate targets    | All regions in top 20000 | Database |
|----|-------------------------------------------------------------------------------------------------------------------------------------------------------------------------------------------------------------------------------------------------------------------------------------------------------------------------------------------------------------------------------------------------------------------------------------------------------------------------------------------------------------------------------------------------------------------------------------------------------------------------------------------------------------------------------------------------------------------------------------------------------------------------------------------------------------------------------------------------------------------------------------------------------------------------------------------------------------------------------------------------------------------------------------------------------------------------------------------------------------------------------------------------------------------------------------------------------------------------------------------------------------------------------------------------------------------------------------------------------------------------------------------------------------------------------------------------------------------------------------------------------------------------------------------------------------------------------------------------------------------------------------------------------------------------------------------------------------------------------------------------------------------------------------------------------------------------------------------------------------------------------------------------------------------------------------------------------------------------------------------------------------------------------------|---------|-------------------------------------------------------------------------------------|---------------------------------------------------------------------------------------|----------------------|--------------------------|----------|
|    | <div><input type="checkbox"/> cisbp__M4870</div> <div>Description: CG5669[<b>gene ID:</b> "FBgn0039169" <b>species:</b> "Drosophila melanogaster" <b>TF status:</b> "direct" <b>TF family:</b> "C2H2 ZF" <b>DBDs:</b> "zf-C2H2"]; SP5[<b>gene ID:</b> "ENSG00000204335" <b>species:</b> "Homo sapiens" <b>TF status:</b> "inferred" <b>TF family:</b> "C2H2 ZF" <b>DBDs:</b> "zf-C2H2"]; SP6[<b>gene ID:</b> "ENSG00000189120" <b>species:</b> "Homo sapiens" <b>TF status:</b> "inferred" <b>TF family:</b> "C2H2 ZF" <b>DBDs:</b> "zf-C2H2"]; SP7[<b>gene ID:</b> "ENSG00000170374" <b>species:</b> "Homo sapiens" <b>TF status:</b> "inferred" <b>TF family:</b> "C2H2 ZF" <b>DBDs:</b> "zf-C2H2"]; SP9[<b>gene ID:</b> "ENSG00000217236" <b>species:</b> "Homo sapiens" <b>TF status:</b> "inferred" <b>TF family:</b> "C2H2 ZF" <b>DBDs:</b> "zf-C2H2"]; Sp2[<b>gene ID:</b> "ENSMUSG00000018678" <b>species:</b> "Mus musculus" <b>TF status:</b> "inferred" <b>TF family:</b> "C2H2 ZF" <b>DBDs:</b> "zf-C2H2"]; Sp3[<b>gene ID:</b> "ENSMUSG000000027109" <b>species:</b> "Mus musculus" <b>TF status:</b> "inferred" <b>TF family:</b> "C2H2 ZF" <b>DBDs:</b> "zf-C2H2"]; Sp5[<b>gene ID:</b> "ENSMUSG000000075304" <b>species:</b> "Mus musculus" <b>TF status:</b> "inferred" <b>TF family:</b> "C2H2 ZF" <b>DBDs:</b> "zf-C2H2"]; Sp6[<b>gene ID:</b> "ENSMUSG000000038560" <b>species:</b> "Mus musculus" <b>TF status:</b> "inferred" <b>TF family:</b> "C2H2 ZF" <b>DBDs:</b> "zf-C2H2"]; Sp7[<b>gene ID:</b> "ENSMUSG000000060284" <b>species:</b> "Mus musculus" <b>TF status:</b> "inferred" <b>TF family:</b> "C2H2 ZF" <b>DBDs:</b> "zf-C2H2"]; Sp8[<b>gene ID:</b> "ENSMUSG000000048562" <b>species:</b> "Mus musculus" <b>TF status:</b> "inferred" <b>TF family:</b> "C2H2 ZF" <b>DBDs:</b> "zf-C2H2"]; Sp9[<b>gene ID:</b> "ENSMUSG000000068859" <b>species:</b> "Mus musculus" <b>TF status:</b> "inferred" <b>TF family:</b> "C2H2 ZF" <b>DBDs:</b> "zf-C2H2"]<br/>Possible TFs: SP1, SP2, SP3, SP4</div> | 5.17884 |    |    | <a href="#">link</a> | <a href="#">link</a>     | PWMs     |
| 28 | <div><input type="checkbox"/> elemento__GCCCCGCC</div> <div>Description: Conserved regulatory element GCCCCGCC between Hs and Mm</div>                                                                                                                                                                                                                                                                                                                                                                                                                                                                                                                                                                                                                                                                                                                                                                                                                                                                                                                                                                                                                                                                                                                                                                                                                                                                                                                                                                                                                                                                                                                                                                                                                                                                                                                                                                                                                                                                                              | 4.97886 |  |  | <a href="#">link</a> | <a href="#">link</a>     | PWMs     |
| 29 | <div><input type="checkbox"/> hocomoco__SP2_HUMAN.H11MO.0.A</div> <div>Description: SP2_HUMAN<br/>Possible TFs: SP2</div>                                                                                                                                                                                                                                                                                                                                                                                                                                                                                                                                                                                                                                                                                                                                                                                                                                                                                                                                                                                                                                                                                                                                                                                                                                                                                                                                                                                                                                                                                                                                                                                                                                                                                                                                                                                                                                                                                                           | 4.94066 |  |  | <a href="#">link</a> | <a href="#">link</a>     | PWMs     |
| 30 | <div><input type="checkbox"/> dbcorrd__CREB1__ENCSR000BRB_1__m1</div> <div>Description: CREB1 (ENCSR000BRB-1, motif 1)<br/>Possible TFs: CREB1</div>                                                                                                                                                                                                                                                                                                                                                                                                                                                                                                                                                                                                                                                                                                                                                                                                                                                                                                                                                                                                                                                                                                                                                                                                                                                                                                                                                                                                                                                                                                                                                                                                                                                                                                                                                                                                                                                                                | 4.93186 |  |  | <a href="#">link</a> | <a href="#">link</a>     | PWMs     |
| 31 | <div><input type="checkbox"/> transfac__pro__M09005</div> <div>Description: V\$SP4_06: SP4<br/>Possible TFs: SP4</div>                                                                                                                                                                                                                                                                                                                                                                                                                                                                                                                                                                                                                                                                                                                                                                                                                                                                                                                                                                                                                                                                                                                                                                                                                                                                                                                                                                                                                                                                                                                                                                                                                                                                                                                                                                                                                                                                                                              | 4.92933 |  |  | <a href="#">link</a> | <a href="#">link</a>     | PWMs     |
| 32 | <div><input type="checkbox"/> transfac__public__M00196</div> <div>Description: V\$SP1_Q6: Sp1<br/>Possible TFs: SP1</div>                                                                                                                                                                                                                                                                                                                                                                                                                                                                                                                                                                                                                                                                                                                                                                                                                                                                                                                                                                                                                                                                                                                                                                                                                                                                                                                                                                                                                                                                                                                                                                                                                                                                                                                                                                                                                                                                                                           | 4.92523 |  |  | <a href="#">link</a> | <a href="#">link</a>     | PWMs     |
| 33 |                                                                                                                                                                                                                                                                                                                                                                                                                                                                                                                                                                                                                                                                                                                                                                                                                                                                                                                                                                                                                                                                                                                                                                                                                                                                                                                                                                                                                                                                                                                                                                                                                                                                                                                                                                                                                                                                                                                                                                                                                                     |         |                                                                                     |                                                                                       |                      |                          |          |

|    |                                                                                                                                                                                                                                                                                                                                                                                                                                                                                                                                                                                                                                                                                                                                                                                                                                                     | All     |      |                | Candidate regions in top 20000 |                      | Database |
|----|-----------------------------------------------------------------------------------------------------------------------------------------------------------------------------------------------------------------------------------------------------------------------------------------------------------------------------------------------------------------------------------------------------------------------------------------------------------------------------------------------------------------------------------------------------------------------------------------------------------------------------------------------------------------------------------------------------------------------------------------------------------------------------------------------------------------------------------------------------|---------|------|----------------|--------------------------------|----------------------|----------|
| #  | Feature                                                                                                                                                                                                                                                                                                                                                                                                                                                                                                                                                                                                                                                                                                                                                                                                                                             | NES     | Logo | Recovery Curve | targets                        |                      |          |
|    | <input type="checkbox"/> cisbp__M3926<br>Description: SP1[ <b>gene ID: "ENSG00000185591"</b> species: "Homo sapiens" TF status: "direct" TF family: "C2H2 ZF" DBDs: "zf-C2H2"]; SP5[ <b>gene ID: "ENSG00000204335"</b> species: "Homo sapiens" TF status: "inferred" TF family: "C2H2 ZF" DBDs: "zf-C2H2"]; SP6[ <b>gene ID: "ENSG00000189120"</b> species: "Homo sapiens" TF status: "inferred" TF family: "C2H2 ZF" DBDs: "zf-C2H2"]; SP7[ <b>gene ID: "ENSG00000170374"</b> species: "Homo sapiens" TF status: "inferred" TF family: "C2H2 ZF" DBDs: "zf-C2H2"]; SP9[ <b>gene ID: "ENSG00000217236"</b> species: "Homo sapiens" TF status: "inferred" TF family: "C2H2 ZF" DBDs: "zf-C2H2"]; SP2[ <b>gene ID: "ENSMUSG00000018678"</b> species: "Mus musculus" TF status: "inferred" TF family: "C2H2 ZF" DBDs: "zf-C2H2"];<br>Possible TFs: SP1 | 4.88175 |      |                | <a href="#">link</a>           | <a href="#">link</a> | PWMs     |
| 34 | Sp3[ <b>gene ID: "ENSMUSG00000027109"</b> species: "Mus musculus" TF status: "inferred" TF family: "C2H2 ZF" DBDs: "zf-C2H2"]; Sp5[ <b>gene ID: "ENSMUSG000000075304"</b> species: "Mus musculus" TF status: "inferred" TF family: "C2H2 ZF" DBDs: "zf-C2H2"]; Sp6[ <b>gene ID: "ENSMUSG00000038560"</b> species: "Mus musculus" TF status: "inferred" TF family: "C2H2 ZF" DBDs: "zf-C2H2"]; Sp7[ <b>gene ID: "ENSMUSG00000060284"</b> species: "Mus musculus" TF status: "inferred" TF family: "C2H2 ZF" DBDs: "zf-C2H2"]; Sp8[ <b>gene ID: "ENSMUSG00000048562"</b> species: "Mus musculus" TF status: "inferred" TF family: "C2H2 ZF" DBDs: "zf-C2H2"]; Sp9[ <b>gene ID: "ENSMUSG00000068859"</b> species: "Mus musculus" TF status: "inferred" TF family: "C2H2 ZF" DBDs: "zf-C2H2"]<br>Possible TFs: SP1                                      | 4.87358 |      |                | <a href="#">link</a>           | <a href="#">link</a> | PWMs     |
| 35 | <input type="checkbox"/> flyfactorsurvey__CG5669_SANGER_10_FBg0039169<br>Description: CG5669_SANGER_10_FBg0039169<br>Possible TFs: SP1, SP2, SP3, SP4                                                                                                                                                                                                                                                                                                                                                                                                                                                                                                                                                                                                                                                                                               | 4.85510 |      |                | <a href="#">link</a>           | <a href="#">link</a> | PWMs     |
| 36 | <input type="checkbox"/> dbcorrdb__SP1_ENCSR000BKO_1_m2<br>Description: SP1 (ENCSR000BKO-1, motif 2)<br>Possible TFs: SP1                                                                                                                                                                                                                                                                                                                                                                                                                                                                                                                                                                                                                                                                                                                           | 4.62164 |      |                | <a href="#">link</a>           | <a href="#">link</a> | PWMs     |
| 37 | <input type="checkbox"/> hocomoco__KLF9_HUMAN.H11MO.0.C<br>Description: KLF9_HUMAN<br>Possible TFs: KLF9                                                                                                                                                                                                                                                                                                                                                                                                                                                                                                                                                                                                                                                                                                                                            | 4.50045 |      |                | <a href="#">link</a>           | <a href="#">link</a> | PWMs     |
| 38 | <input type="checkbox"/> hocomoco__E2F4_MOUSE.H11MO.0.A<br>Description: E2F4_MOUSE<br>Possible TFs: E2F4                                                                                                                                                                                                                                                                                                                                                                                                                                                                                                                                                                                                                                                                                                                                            | 4.44174 |      |                | <a href="#">link</a>           | <a href="#">link</a> | PWMs     |
| 39 | <input type="checkbox"/> taipale_cyt_meth__SP3_NRCCMCGCCCMYN_eDBD<br>Description: SP3 [Znf_C2H2]<br>Possible TFs: SP3                                                                                                                                                                                                                                                                                                                                                                                                                                                                                                                                                                                                                                                                                                                               | 4.43304 |      |                | <a href="#">link</a>           | <a href="#">link</a> | PWMs     |
| 40 | <input type="checkbox"/> taipale_cyt_meth__KLF15_RCCACGCCCMYN_eDBD_meth<br>Description: KLF15 [Znf_C2H2, CpG-meth]<br>Possible TFs: KLF15                                                                                                                                                                                                                                                                                                                                                                                                                                                                                                                                                                                                                                                                                                           | 4.42423 |      |                | <a href="#">link</a>           | <a href="#">link</a> | PWMs     |
| 41 | <input type="checkbox"/> transfac_pro__M07615<br>Description: V\$SP3_Q3_01: Sp3<br>Possible TFs: SP3                                                                                                                                                                                                                                                                                                                                                                                                                                                                                                                                                                                                                                                                                                                                                |         |      |                |                                |                      |          |

| #  | Feature                                                                                                                                                                                                        | NES     | Logo                                                                                | Recovery Curve                                                                       | Candidate targets    | All regions in top 20000 | Database |
|----|----------------------------------------------------------------------------------------------------------------------------------------------------------------------------------------------------------------|---------|-------------------------------------------------------------------------------------|--------------------------------------------------------------------------------------|----------------------|--------------------------|----------|
| 42 | <input type="checkbox"/> transfac_pro__M05319<br>Description: V\$KLF7_Q05: KLF7<br>Possible TFs: KLF7                                                                                                          | 4.42198 |    |    | <a href="#">link</a> | <a href="#">link</a>     | PWMs     |
| 43 | <input type="checkbox"/> transfac_pro__M01861<br>Description: V\$ATF1_Q6_Q01: ATF-1<br>Possible TFs: ATF1                                                                                                      | 4.40866 |    |    | <a href="#">link</a> | <a href="#">link</a>     | PWMs     |
| 44 | <input type="checkbox"/> taipale__KLF14_DBD_NGCCACGCCCMCNT<br>Description: KLF14 monomeric C2H2 DBD<br>Possible TFs: KLF14                                                                                     | 4.39668 |    |    | <a href="#">link</a> | <a href="#">link</a>     | PWMs     |
| 45 | <input type="checkbox"/> cisbp__M4837<br>Description: CG3065[gene ID: "FBgn0034946" species: "Drosophila melanogaster" TF status: "direct" TF family: "C2H2 ZF" DBDs: "zf-C2H2"]<br>Possible TFs: KLF18, KLF17 | 4.39359 |    |    | <a href="#">link</a> | <a href="#">link</a>     | PWMs     |
| 46 | <input type="checkbox"/> dbcorrd__BRCA1_ENCSR000EDB_1_m1<br>Description: BRCA1 (ENCSR000EDB-1, motif 1)<br>Possible TFs: BRCA1                                                                                 | 4.38225 |    |    | <a href="#">link</a> | <a href="#">link</a>     | PWMs     |
| 47 | <input type="checkbox"/> transfac_pro__M05318<br>Description: V\$KLF8_Q01: KLF8<br>Possible TFs: KLF8                                                                                                          | 4.35375 |    |    | <a href="#">link</a> | <a href="#">link</a>     | PWMs     |
| 48 | <input type="checkbox"/> hocomoco__SP2_HUMAN.H11MO.1.B<br>Description: SP2_HUMAN<br>Possible TFs: SP2                                                                                                          | 4.33349 |  |  | <a href="#">link</a> | <a href="#">link</a>     | PWMs     |
| 49 | <input type="checkbox"/> transfac_pro__M05437<br>Description: V\$KLF7_Q06: Klf7<br>Possible TFs: KLF7                                                                                                          | 4.32844 |  |  | <a href="#">link</a> | <a href="#">link</a>     | PWMs     |
| 50 | <input type="checkbox"/> flyfactorsurvey__CG3065_F1-5_SOLEXA_2.5_FBgn0034946<br>Description: CG3065_F1-5_SOLEXA_2.5_FBgn0034946<br>Possible TFs: KLF18, KLF17                                                  | 4.21087 |  |  | <a href="#">link</a> | <a href="#">link</a>     | PWMs     |
| 51 | <input type="checkbox"/> taipale_cyt_meth__SP1_NWRGCCACGCCCMYN_eDBD_meth<br>Description: SP1 [Znf_C2H2, CpG-meth]<br>Possible TFs: SP1                                                                         | 4.19607 |  |  | <a href="#">link</a> | <a href="#">link</a>     | PWMs     |
| 52 | <input type="checkbox"/> taipale_cyt_meth__CREB1_NRTGACGTN_eDBD_repr<br>Description: CREB1 [bZIP]<br>Possible TFs: CREB1                                                                                       | 4.18973 |  |  | <a href="#">link</a> | <a href="#">link</a>     | PWMs     |
| 53 | <input type="checkbox"/> transfac_pro__M04687<br>Description: V\$BRCA1_Q02: BRCA1<br>Possible TFs: BRCA1                                                                                                       | 4.16645 |  |  | <a href="#">link</a> | <a href="#">link</a>     | PWMs     |
| 54 | <input type="checkbox"/> transfac_pro__M00931<br>Description: V\$SP1_Q6_Q01: Sp1<br>Possible TFs: SP1, SP3, SP4                                                                                                | 4.16142 |  |  | <a href="#">link</a> | <a href="#">link</a>     | PWMs     |

|    |                                                                                                                                                                                                                                                                                                                                                                                                                                                                                                                                                                                                                                                                          |         |                                                                                     |                                                                                      | All                  |                      |             |
|----|--------------------------------------------------------------------------------------------------------------------------------------------------------------------------------------------------------------------------------------------------------------------------------------------------------------------------------------------------------------------------------------------------------------------------------------------------------------------------------------------------------------------------------------------------------------------------------------------------------------------------------------------------------------------------|---------|-------------------------------------------------------------------------------------|--------------------------------------------------------------------------------------|----------------------|----------------------|-------------|
| #  | Feature                                                                                                                                                                                                                                                                                                                                                                                                                                                                                                                                                                                                                                                                  | NES     | Logo                                                                                | Recovery Curve                                                                       | Candidate targets    | regions in top 20000 | Database    |
| 55 | <input type="checkbox"/> transfac_pro__M05555<br>Description: V\$SP5_02: Sp5<br>Possible TFs: SP5                                                                                                                                                                                                                                                                                                                                                                                                                                                                                                                                                                        | 4.15020 | 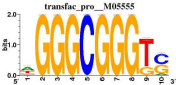   |    | <a href="#">link</a> | <a href="#">link</a> | PWMs        |
| 56 | <input type="checkbox"/> transfac_pro__M00932<br>Description: V\$SP1_Q4_01: Sp1<br>Possible TFs: SP1, SP2, SP3, SP4                                                                                                                                                                                                                                                                                                                                                                                                                                                                                                                                                      | 4.14446 |    |    | <a href="#">link</a> | <a href="#">link</a> | PWMs        |
| 57 | <input type="checkbox"/> cisbp__M6180<br>Description: CREB1[gene ID: "ENSG00000118260" species: "Homo sapiens" TF status: "direct" TF family: "bZIP" DBDs: "bZIP_1"]; CrebB-17A[gene ID: "FBgn0014467" species: "Drosophila melanogaster" TF status: "inferred" TF family: "bZIP" DBDs: "bZIP_1"]<br>Possible TFs: CREB1                                                                                                                                                                                                                                                                                                                                                 | 4.13680 |    |    | <a href="#">link</a> | <a href="#">link</a> | PWMs        |
| 58 | <input type="checkbox"/> transfac_pro__M05552<br>Description: V\$SP5_01: SP5<br>Possible TFs: SP5                                                                                                                                                                                                                                                                                                                                                                                                                                                                                                                                                                        | 4.09022 |    |    | <a href="#">link</a> | <a href="#">link</a> | PWMs        |
| 59 | <input type="checkbox"/> elemento__CCAATCG<br>Description: Conserved regulatory element CCAATCG between Hs and Mm                                                                                                                                                                                                                                                                                                                                                                                                                                                                                                                                                        | 4.08872 |    |    | <a href="#">link</a> | <a href="#">link</a> | PWMs        |
| 60 | <input type="checkbox"/> dbcorrd__E2F4__ENCSR000DYY_1_m2<br>Description: E2F4 (ENCSR000DYY-1, motif 2)<br>Possible TFs: E2F4                                                                                                                                                                                                                                                                                                                                                                                                                                                                                                                                             | 4.08690 |   |   | <a href="#">link</a> | <a href="#">link</a> | PWMs        |
| 61 | <input type="checkbox"/> transfac_public__M00255<br>Description: V\$GC_01: GC box                                                                                                                                                                                                                                                                                                                                                                                                                                                                                                                                                                                        | 4.06845 |  |  | <a href="#">link</a> | <a href="#">link</a> | PWMs        |
| 62 | <input type="checkbox"/> cisbp__M5592<br>Description: KLF14[gene ID: "ENSG00000174595" species: "Homo sapiens" TF status: "direct" TF family: "C2H2 ZF" DBDs: "zf-C2H2"]; KLF9[gene ID: "ENSG00000119138" species: "Homo sapiens" TF status: "inferred" TF family: "C2H2 ZF" DBDs: "zf-C2H2"]; Klf11[gene ID: "ENSMUSG00000020653" species: "Mus musculus" TF status: "inferred" TF family: "C2H2 ZF" DBDs: "zf-C2H2"]; Klf13[gene ID: "ENSMUSG00000052040" species: "Mus musculus" TF status: "inferred" TF family: "C2H2 ZF" DBDs: "zf-C2H2"]; Klf14[gene ID: "ENSMUSG00000073209" species: "Mus musculus" TF status: "inferred" TF family: "C2H2 ZF" DBDs: "zf-C2H2"] | 4.05783 |  |  | <a href="#">link</a> | <a href="#">link</a> | PWMs        |
| 63 | <input type="checkbox"/> E086-DNase.hotspot.all.peaks-narrowpeak<br>Description: DNase in Fetal Kidney (E086, narrowpeak, hotspot)                                                                                                                                                                                                                                                                                                                                                                                                                                                                                                                                       | 4.04578 |                                                                                     |  | <a href="#">link</a> | <a href="#">link</a> | DHS & FAIRE |
| 64 | <input type="checkbox"/> transfac_pro__M05493<br>Description: V\$SP9_01: SP9<br>Possible TFs: SP9                                                                                                                                                                                                                                                                                                                                                                                                                                                                                                                                                                        | 4.03623 |  |  | <a href="#">link</a> | <a href="#">link</a> | PWMs        |
| 65 | <input type="checkbox"/> cisbp__M2247<br>Description: btd[gene ID: "FBgn0000233" species: "Drosophila melanogaster" TF status: "direct" TF family: "C2H2 ZF" DBDs: "zf-C2H2"]<br>Possible TFs: SP1, SP2, SP3, SP4                                                                                                                                                                                                                                                                                                                                                                                                                                                        | 4.02771 |  |  | <a href="#">link</a> | <a href="#">link</a> | PWMs        |

| #  |                          | Feature                                                                                                                                                                                  | NES     | Logo                                                                                | Recovery Curve                                                                       | Candidate targets    | All regions in top 20000 | Database |
|----|--------------------------|------------------------------------------------------------------------------------------------------------------------------------------------------------------------------------------|---------|-------------------------------------------------------------------------------------|--------------------------------------------------------------------------------------|----------------------|--------------------------|----------|
| 66 | <input type="checkbox"/> | transfac_pro__M03807<br>Description: V\$SP2_Q3_01: SP2<br>Possible TFs: SP2                                                                                                              | 4.02549 | 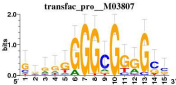   |    | <a href="#">link</a> | <a href="#">link</a>     | PWMs     |
| 67 | <input type="checkbox"/> | cisbp__M4839<br>Description: CG3065[gene ID: "FBgn0034946" species: "Drosophila melanogaster" TF status: "direct" TF family: "C2H2 ZF" DBDs: "zf-C2H2"]<br>Possible TFs: KLF18, KLF17    | 4.02240 |    |    | <a href="#">link</a> | <a href="#">link</a>     | PWMs     |
| 68 | <input type="checkbox"/> | transfac_pro__M04797<br>Description: V\$EGR1_09: Egr-1<br>Possible TFs: EGR1                                                                                                             | 4.02004 |    |    | <a href="#">link</a> | <a href="#">link</a>     | PWMs     |
| 69 | <input type="checkbox"/> | cisbp__M4782<br>Description: btd[gene ID: "FBgn0000233" species: "Drosophila melanogaster" TF status: "direct" TF family: "C2H2 ZF" DBDs: "zf-C2H2"]<br>Possible TFs: SP1, SP2, SP3, SP4 | 4.01745 |    |    | <a href="#">link</a> | <a href="#">link</a>     | PWMs     |
| 70 | <input type="checkbox"/> | transfac_pro__M05553<br>Description: V\$SP8_02: SP8<br>Possible TFs: SP8                                                                                                                 | 4.01739 |    |    | <a href="#">link</a> | <a href="#">link</a>     | PWMs     |
| 71 | <input type="checkbox"/> | predrem__nrMotif583<br>Description: 154_fLung_R-DS17162.M642                                                                                                                             | 4.01023 |    |    | <a href="#">link</a> | <a href="#">link</a>     | PWMs     |
| 72 | <input type="checkbox"/> | hocomoco__KLF14_HUMAN.H11MO.0.D<br>Description: KLF14_HUMAN                                                                                                                              | 3.99032 |   |   | <a href="#">link</a> | <a href="#">link</a>     | PWMs     |
| 73 | <input type="checkbox"/> | cisbp__M1748<br>Description: M1748                                                                                                                                                       | 3.98708 |  |  | <a href="#">link</a> | <a href="#">link</a>     | PWMs     |
| 74 | <input type="checkbox"/> | jaspar__MA1034.1<br>Description: Os05g0497200                                                                                                                                            | 3.98676 |  |  | <a href="#">link</a> | <a href="#">link</a>     | PWMs     |
| 75 | <input type="checkbox"/> | dbcorrd__POLR2A__ENCSR000BHI_1__m1<br>Description: POLR2A (ENCSR000BHI-1, motif 1)<br>Possible TFs: POLR2A                                                                               | 3.98593 |  |  | <a href="#">link</a> | <a href="#">link</a>     | PWMs     |
| 76 | <input type="checkbox"/> | dbcorrd__POLR2A__ENCSR000DNF_1__m1<br>Description: POLR2A (ENCSR000DNF-1, motif 1)<br>Possible TFs: POLR2A                                                                               | 3.98585 |  |  | <a href="#">link</a> | <a href="#">link</a>     | PWMs     |
| 77 | <input type="checkbox"/> | dbcorrd__E2F4__ENCSR000DOR_1__m2<br>Description: E2F4 (ENCSR000DOR-1, motif 2)<br>Possible TFs: E2F4                                                                                     | 3.98419 |  |  | <a href="#">link</a> | <a href="#">link</a>     | PWMs     |
| 78 | <input type="checkbox"/> | cisbp__M0043<br>Description: M0043                                                                                                                                                       | 3.98230 |  |  | <a href="#">link</a> | <a href="#">link</a>     | PWMs     |



| #  | Feature                                                                                                                       | NES     | Logo                                                                                | Recovery Curve                                                                       | Candidate targets    | All regions in top 20000 | Database    |
|----|-------------------------------------------------------------------------------------------------------------------------------|---------|-------------------------------------------------------------------------------------|--------------------------------------------------------------------------------------|----------------------|--------------------------|-------------|
| 79 | <input type="checkbox"/> predrem__nrMotif258<br>Description: 261_HAc-DS14765.M101                                             | 3.97119 | 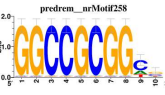   |    | <a href="#">link</a> | <a href="#">link</a>     | PWMs        |
| 80 | <input type="checkbox"/> dbcorrd__CHD2__ENCSR000EBT_1__m1<br>Description: CHD2 (ENCSR000EBT-1, motif 1)<br>Possible TFs: CHD2 | 3.96605 |    |    | <a href="#">link</a> | <a href="#">link</a>     | PWMs        |
| 81 | <input type="checkbox"/> dbcorrd__ATF3__ENCSR000BJY_1__m1<br>Description: ATF3 (ENCSR000BJY-1, motif 1)<br>Possible TFs: ATF3 | 3.96120 |    |    | <a href="#">link</a> | <a href="#">link</a>     | PWMs        |
| 82 | <input type="checkbox"/> dbcorrd__FOS__ENCSR000EYZ_1__m1<br>Description: FOS (ENCSR000EYZ-1, motif 1)<br>Possible TFs: FOS    | 3.95296 |    |    | <a href="#">link</a> | <a href="#">link</a>     | PWMs        |
| 83 | <input type="checkbox"/> transfac_pro__M07395<br>Description: V\$SP1_Q2_02: Sp1<br>Possible TFs: SP1                          | 3.94406 |    |    | <a href="#">link</a> | <a href="#">link</a>     | PWMs        |
| 84 | <input type="checkbox"/> jaspar__MA0516.1<br>Description: SP2<br>Possible TFs: SP2                                            | 3.93293 |    |   | <a href="#">link</a> | <a href="#">link</a>     | PWMs        |
| 85 | <input type="checkbox"/> ENCF001WEP<br>Description: DNase-seq on human CD20+ (R001778)                                        | 3.92383 |                                                                                     |  | <a href="#">link</a> | <a href="#">link</a>     | DHS & FAIRE |
| 86 | <input type="checkbox"/> ENCF001WIW<br>Description: DNase-seq on human HepG2                                                  | 3.92357 |                                                                                     |  | <a href="#">link</a> | <a href="#">link</a>     | DHS & FAIRE |
| 87 | <input type="checkbox"/> taipale_cyt_meth__SP8_NCCACGCCCMYN_eDBD<br>Description: SP8 [Znf_C2H2]<br>Possible TFs: SP8          | 3.91954 |  |  | <a href="#">link</a> | <a href="#">link</a>     | PWMs        |
| 88 | <input type="checkbox"/> predrem__nrMotif1136<br>Description: 196_fMuscle_leg-DS19272.M145                                    | 3.90649 |  |  | <a href="#">link</a> | <a href="#">link</a>     | PWMs        |
| 89 | <input type="checkbox"/> jaspar__MA0535.1<br>Description: Mad<br>Possible TFs: SMAD5, SMAD1, SMAD9                            | 3.90585 |  |  | <a href="#">link</a> | <a href="#">link</a>     | PWMs        |
| 90 | <input type="checkbox"/> ENCF001VYW<br>Description: DNase-seq on human CD20+ (R001778)                                        | 3.90459 |                                                                                     |  | <a href="#">link</a> | <a href="#">link</a>     | DHS & FAIRE |
| 91 | <input type="checkbox"/> hocomoco__SP1_MOUSE.H11MO.1.A<br>Description: SP1_MOUSE<br>Possible TFs: SP1                         | 3.90056 |  |  | <a href="#">link</a> | <a href="#">link</a>     | PWMs        |

|    |                                                                                                                                                                                                                                                                                                                                                                                                                                                                                                                                                                                                                                                                                                                                                                                                                                                                                                                                                                                                                                                                                                                                                                                                                                                                                                                                                                                                                                                                                                                                                                                                                                                                                                                                                                                 |         |                                                                                     |                                                                                       |                      | All                  |             |  |
|----|---------------------------------------------------------------------------------------------------------------------------------------------------------------------------------------------------------------------------------------------------------------------------------------------------------------------------------------------------------------------------------------------------------------------------------------------------------------------------------------------------------------------------------------------------------------------------------------------------------------------------------------------------------------------------------------------------------------------------------------------------------------------------------------------------------------------------------------------------------------------------------------------------------------------------------------------------------------------------------------------------------------------------------------------------------------------------------------------------------------------------------------------------------------------------------------------------------------------------------------------------------------------------------------------------------------------------------------------------------------------------------------------------------------------------------------------------------------------------------------------------------------------------------------------------------------------------------------------------------------------------------------------------------------------------------------------------------------------------------------------------------------------------------|---------|-------------------------------------------------------------------------------------|---------------------------------------------------------------------------------------|----------------------|----------------------|-------------|--|
| #  | Feature                                                                                                                                                                                                                                                                                                                                                                                                                                                                                                                                                                                                                                                                                                                                                                                                                                                                                                                                                                                                                                                                                                                                                                                                                                                                                                                                                                                                                                                                                                                                                                                                                                                                                                                                                                         | NES     | Logo                                                                                | Recovery Curve                                                                        | Candidate targets    | regions in top 20000 | Database    |  |
| 92 | <input type="checkbox"/> cisbp__M2329<br>Description: Mad[ <a href="#">gene ID: "FBgn0011648"</a> species: "Drosophila melanogaster" TF status: "direct" TF family: "SMAD" DBDs: "MH1"]; Smad1[ <a href="#">gene ID: "ENSMUSG00000031681"</a> species: "Mus musculus" TF status: "inferred" TF family: "SMAD" DBDs: "MH1"]<br>Possible TFs: SMAD5, SMAD1, SMAD9                                                                                                                                                                                                                                                                                                                                                                                                                                                                                                                                                                                                                                                                                                                                                                                                                                                                                                                                                                                                                                                                                                                                                                                                                                                                                                                                                                                                                 | 3.89641 | 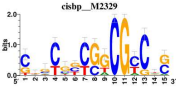   |    | <a href="#">link</a> | <a href="#">link</a> | PWMs        |  |
|    |                                                                                                                                                                                                                                                                                                                                                                                                                                                                                                                                                                                                                                                                                                                                                                                                                                                                                                                                                                                                                                                                                                                                                                                                                                                                                                                                                                                                                                                                                                                                                                                                                                                                                                                                                                                 |         |                                                                                     |                                                                                       |                      |                      |             |  |
| 93 | <input type="checkbox"/> dbcorrd__NFYB__ENCSR000DNR_1__m1<br>Description: NFYB (ENCSR000DNR-1, motif 1)<br>Possible TFs: NFYB                                                                                                                                                                                                                                                                                                                                                                                                                                                                                                                                                                                                                                                                                                                                                                                                                                                                                                                                                                                                                                                                                                                                                                                                                                                                                                                                                                                                                                                                                                                                                                                                                                                   | 3.88548 |    |    | <a href="#">link</a> | <a href="#">link</a> | PWMs        |  |
|    |                                                                                                                                                                                                                                                                                                                                                                                                                                                                                                                                                                                                                                                                                                                                                                                                                                                                                                                                                                                                                                                                                                                                                                                                                                                                                                                                                                                                                                                                                                                                                                                                                                                                                                                                                                                 |         |                                                                                     |                                                                                       |                      |                      |             |  |
| 94 | <input type="checkbox"/> dbcorrd__SP1__ENCSR000BHK_1__m1<br>Description: SP1 (ENCSR000BHK-1, motif 1)<br>Possible TFs: SP1                                                                                                                                                                                                                                                                                                                                                                                                                                                                                                                                                                                                                                                                                                                                                                                                                                                                                                                                                                                                                                                                                                                                                                                                                                                                                                                                                                                                                                                                                                                                                                                                                                                      | 3.88283 |    |    | <a href="#">link</a> | <a href="#">link</a> | PWMs        |  |
|    |                                                                                                                                                                                                                                                                                                                                                                                                                                                                                                                                                                                                                                                                                                                                                                                                                                                                                                                                                                                                                                                                                                                                                                                                                                                                                                                                                                                                                                                                                                                                                                                                                                                                                                                                                                                 |         |                                                                                     |                                                                                       |                      |                      |             |  |
| 95 | <input type="checkbox"/> transfac_pro__M05066<br>Description: P\$ERF1_05: ERF1(2)                                                                                                                                                                                                                                                                                                                                                                                                                                                                                                                                                                                                                                                                                                                                                                                                                                                                                                                                                                                                                                                                                                                                                                                                                                                                                                                                                                                                                                                                                                                                                                                                                                                                                               | 3.87716 |    |    | <a href="#">link</a> | <a href="#">link</a> | PWMs        |  |
|    |                                                                                                                                                                                                                                                                                                                                                                                                                                                                                                                                                                                                                                                                                                                                                                                                                                                                                                                                                                                                                                                                                                                                                                                                                                                                                                                                                                                                                                                                                                                                                                                                                                                                                                                                                                                 |         |                                                                                     |                                                                                       |                      |                      |             |  |
| 96 | <input type="checkbox"/> cisbp__M5209<br>Description: SP5[ <a href="#">gene ID: "ENSG00000204335"</a> species: "Homo sapiens" TF status: "inferred" TF family: "C2H2 ZF" DBDs: "zf-C2H2"]; SP6[ <a href="#">gene ID: "ENSG00000189120"</a> species: "Homo sapiens" TF status: "inferred" TF family: "C2H2 ZF" DBDs: "zf-C2H2"]; SP7[ <a href="#">gene ID: "ENSG00000170374"</a> species: "Homo sapiens" TF status: "inferred" TF family: "C2H2 ZF" DBDs: "zf-C2H2"]; SP9[ <a href="#">gene ID: "ENSG00000217236"</a> species: "Homo sapiens" TF status: "inferred" TF family: "C2H2 ZF" DBDs: "zf-C2H2"]; Sp1[ <a href="#">gene ID: "FBgn0020378"</a> species: "Drosophila melanogaster" TF status: "direct" TF family: "C2H2 ZF" DBDs: "zf-C2H2"]; Sp2[ <a href="#">gene ID: "ENSMUSG00000018678"</a> species: "Mus musculus" TF status: "inferred" TF family: "C2H2 ZF" DBDs: "zf-C2H2"]; Sp3[ <a href="#">gene ID: "ENSMUSG00000027109"</a> species: "Mus musculus" TF status: "inferred" TF family: "C2H2 ZF" DBDs: "zf-C2H2"]; Sp5[ <a href="#">gene ID: "ENSMUSG00000075304"</a> species: "Mus musculus" TF status: "inferred" TF family: "C2H2 ZF" DBDs: "zf-C2H2"]; Sp6[ <a href="#">gene ID: "ENSMUSG00000038560"</a> species: "Mus musculus" TF status: "inferred" TF family: "C2H2 ZF" DBDs: "zf-C2H2"]; Sp7[ <a href="#">gene ID: "ENSMUSG00000060284"</a> species: "Mus musculus" TF status: "inferred" TF family: "C2H2 ZF" DBDs: "zf-C2H2"]; Sp8[ <a href="#">gene ID: "ENSMUSG00000048562"</a> species: "Mus musculus" TF status: "inferred" TF family: "C2H2 ZF" DBDs: "zf-C2H2"]; Sp9[ <a href="#">gene ID: "ENSMUSG000000068859"</a> species: "Mus musculus" TF status: "inferred" TF family: "C2H2 ZF" DBDs: "zf-C2H2"]<br>Possible TFs: SP8, SP9, SP6, SP7 | 3.87647 |  |  | <a href="#">link</a> | <a href="#">link</a> | PWMs        |  |
|    |                                                                                                                                                                                                                                                                                                                                                                                                                                                                                                                                                                                                                                                                                                                                                                                                                                                                                                                                                                                                                                                                                                                                                                                                                                                                                                                                                                                                                                                                                                                                                                                                                                                                                                                                                                                 |         |                                                                                     |                                                                                       |                      |                      |             |  |
| 97 | <input type="checkbox"/> dbcorrd__NFYA__ENCSR000DNS_1__m1<br>Description: NFYA (ENCSR000DNS-1, motif 1)<br>Possible TFs: NFYA                                                                                                                                                                                                                                                                                                                                                                                                                                                                                                                                                                                                                                                                                                                                                                                                                                                                                                                                                                                                                                                                                                                                                                                                                                                                                                                                                                                                                                                                                                                                                                                                                                                   | 3.87503 |  |  | <a href="#">link</a> | <a href="#">link</a> | PWMs        |  |
|    |                                                                                                                                                                                                                                                                                                                                                                                                                                                                                                                                                                                                                                                                                                                                                                                                                                                                                                                                                                                                                                                                                                                                                                                                                                                                                                                                                                                                                                                                                                                                                                                                                                                                                                                                                                                 |         |                                                                                     |                                                                                       |                      |                      |             |  |
| 98 | <input type="checkbox"/> ENCF001VZW<br>Description: DNase-seq on human HepG2                                                                                                                                                                                                                                                                                                                                                                                                                                                                                                                                                                                                                                                                                                                                                                                                                                                                                                                                                                                                                                                                                                                                                                                                                                                                                                                                                                                                                                                                                                                                                                                                                                                                                                    | 3.86639 |  |  | <a href="#">link</a> | <a href="#">link</a> | DHS & FAIRE |  |
|    |                                                                                                                                                                                                                                                                                                                                                                                                                                                                                                                                                                                                                                                                                                                                                                                                                                                                                                                                                                                                                                                                                                                                                                                                                                                                                                                                                                                                                                                                                                                                                                                                                                                                                                                                                                                 |         |                                                                                     |                                                                                       |                      |                      |             |  |

|     |                                                                                                                                                                                                                                                                                                                                                                                                                                                                                                                                                                                                                                                                                                                                                                                                                                                                                                                                                                                                                                                                                                                                                                                                                                                                                                                                                                                                                                                                                                                                                                                                                                                                                                                                                                                                                                                                                                                                                                                                 |         |                                                                                     |                                                                                      | All                  |                      |          |  |
|-----|-------------------------------------------------------------------------------------------------------------------------------------------------------------------------------------------------------------------------------------------------------------------------------------------------------------------------------------------------------------------------------------------------------------------------------------------------------------------------------------------------------------------------------------------------------------------------------------------------------------------------------------------------------------------------------------------------------------------------------------------------------------------------------------------------------------------------------------------------------------------------------------------------------------------------------------------------------------------------------------------------------------------------------------------------------------------------------------------------------------------------------------------------------------------------------------------------------------------------------------------------------------------------------------------------------------------------------------------------------------------------------------------------------------------------------------------------------------------------------------------------------------------------------------------------------------------------------------------------------------------------------------------------------------------------------------------------------------------------------------------------------------------------------------------------------------------------------------------------------------------------------------------------------------------------------------------------------------------------------------------------|---------|-------------------------------------------------------------------------------------|--------------------------------------------------------------------------------------|----------------------|----------------------|----------|--|
| #   | Feature                                                                                                                                                                                                                                                                                                                                                                                                                                                                                                                                                                                                                                                                                                                                                                                                                                                                                                                                                                                                                                                                                                                                                                                                                                                                                                                                                                                                                                                                                                                                                                                                                                                                                                                                                                                                                                                                                                                                                                                         | NES     | Logo                                                                                | Recovery Curve                                                                       | Candidate targets    | regions in top 20000 | Database |  |
| 99  | <input type="checkbox"/> cisbp__M2314                                                                                                                                                                                                                                                                                                                                                                                                                                                                                                                                                                                                                                                                                                                                                                                                                                                                                                                                                                                                                                                                                                                                                                                                                                                                                                                                                                                                                                                                                                                                                                                                                                                                                                                                                                                                                                                                                                                                                           | 3.86575 | 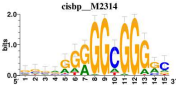   |    | <a href="#">link</a> | <a href="#">link</a> | PWMs     |  |
|     | Description: SP2[ <b>gene ID</b> : "ENSG00000167182" <b>species</b> : "Homo sapiens" <b>TF status</b> : "direct" <b>TF family</b> : "C2H2 ZF" <b>DBDs</b> : "zf-C2H2"]; SP5[ <b>gene ID</b> : "ENSG00000204335" <b>species</b> : "Homo sapiens" <b>TF status</b> : "inferred" <b>TF family</b> : "C2H2 ZF" <b>DBDs</b> : "zf-C2H2"]; SP6[ <b>gene ID</b> : "ENSG00000189120" <b>species</b> : "Homo sapiens" <b>TF status</b> : "inferred" <b>TF family</b> : "C2H2 ZF" <b>DBDs</b> : "zf-C2H2"]; SP7[ <b>gene ID</b> : "ENSG00000170374" <b>species</b> : "Homo sapiens" <b>TF status</b> : "inferred" <b>TF family</b> : "C2H2 ZF" <b>DBDs</b> : "zf-C2H2"]; SP9[ <b>gene ID</b> : "ENSG00000217236" <b>species</b> : "Homo sapiens" <b>TF status</b> : "inferred" <b>TF family</b> : "C2H2 ZF" <b>DBDs</b> : "zf-C2H2"]; Sp2[ <b>gene ID</b> : "ENSMUSG00000018678" <b>species</b> : "Mus musculus" <b>TF status</b> : "inferred" <b>TF family</b> : "C2H2 ZF" <b>DBDs</b> : "zf-C2H2"]; Sp3[ <b>gene ID</b> : "ENSMUSG00000027109" <b>species</b> : "Mus musculus" <b>TF status</b> : "inferred" <b>TF family</b> : "C2H2 ZF" <b>DBDs</b> : "zf-C2H2"]; Sp5[ <b>gene ID</b> : "ENSMUSG000000075304" <b>species</b> : "Mus musculus" <b>TF status</b> : "inferred" <b>TF family</b> : "C2H2 ZF" <b>DBDs</b> : "zf-C2H2"]; Sp6[ <b>gene ID</b> : "ENSMUSG000000038560" <b>species</b> : "Mus musculus" <b>TF status</b> : "inferred" <b>TF family</b> : "C2H2 ZF" <b>DBDs</b> : "zf-C2H2"]; Sp7[ <b>gene ID</b> : "ENSMUSG000000060284" <b>species</b> : "Mus musculus" <b>TF status</b> : "inferred" <b>TF family</b> : "C2H2 ZF" <b>DBDs</b> : "zf-C2H2"]; Sp8[ <b>gene ID</b> : "ENSMUSG000000048562" <b>species</b> : "Mus musculus" <b>TF status</b> : "inferred" <b>TF family</b> : "C2H2 ZF" <b>DBDs</b> : "zf-C2H2"]; Sp9[ <b>gene ID</b> : "ENSMUSG000000068859" <b>species</b> : "Mus musculus" <b>TF status</b> : "inferred" <b>TF family</b> : "C2H2 ZF" <b>DBDs</b> : "zf-C2H2"] |         |                                                                                     |                                                                                      |                      |                      |          |  |
|     | Possible TFs: SP2                                                                                                                                                                                                                                                                                                                                                                                                                                                                                                                                                                                                                                                                                                                                                                                                                                                                                                                                                                                                                                                                                                                                                                                                                                                                                                                                                                                                                                                                                                                                                                                                                                                                                                                                                                                                                                                                                                                                                                               |         |                                                                                     |                                                                                      |                      |                      |          |  |
|     | <input type="checkbox"/> dbcorrd__CHD2__ENCSR000EED_1__m1                                                                                                                                                                                                                                                                                                                                                                                                                                                                                                                                                                                                                                                                                                                                                                                                                                                                                                                                                                                                                                                                                                                                                                                                                                                                                                                                                                                                                                                                                                                                                                                                                                                                                                                                                                                                                                                                                                                                       |         |                                                                                     |                                                                                      |                      |                      |          |  |
|     | Description: CHD2 (ENCSR000EED-1, motif 1)<br>Possible TFs: CHD2                                                                                                                                                                                                                                                                                                                                                                                                                                                                                                                                                                                                                                                                                                                                                                                                                                                                                                                                                                                                                                                                                                                                                                                                                                                                                                                                                                                                                                                                                                                                                                                                                                                                                                                                                                                                                                                                                                                                |         |                                                                                     |                                                                                      |                      |                      |          |  |
| 101 | <input type="checkbox"/> predrem__nrMotif374                                                                                                                                                                                                                                                                                                                                                                                                                                                                                                                                                                                                                                                                                                                                                                                                                                                                                                                                                                                                                                                                                                                                                                                                                                                                                                                                                                                                                                                                                                                                                                                                                                                                                                                                                                                                                                                                                                                                                    | 3.84494 |  |  | <a href="#">link</a> | <a href="#">link</a> | PWMs     |  |
|     | Description: 304_hTH1-DS7840.M360                                                                                                                                                                                                                                                                                                                                                                                                                                                                                                                                                                                                                                                                                                                                                                                                                                                                                                                                                                                                                                                                                                                                                                                                                                                                                                                                                                                                                                                                                                                                                                                                                                                                                                                                                                                                                                                                                                                                                               |         |                                                                                     |                                                                                      |                      |                      |          |  |
| 102 | <input type="checkbox"/> dbcorrd__POLR2A__ENCSR000DMZ_1__m2                                                                                                                                                                                                                                                                                                                                                                                                                                                                                                                                                                                                                                                                                                                                                                                                                                                                                                                                                                                                                                                                                                                                                                                                                                                                                                                                                                                                                                                                                                                                                                                                                                                                                                                                                                                                                                                                                                                                     | 3.82615 |  |  | <a href="#">link</a> | <a href="#">link</a> | PWMs     |  |
|     | Description: POLR2A (ENCSR000DMZ-1, motif 2)<br>Possible TFs: POLR2A                                                                                                                                                                                                                                                                                                                                                                                                                                                                                                                                                                                                                                                                                                                                                                                                                                                                                                                                                                                                                                                                                                                                                                                                                                                                                                                                                                                                                                                                                                                                                                                                                                                                                                                                                                                                                                                                                                                            |         |                                                                                     |                                                                                      |                      |                      |          |  |
| 103 | <input type="checkbox"/> elemento__CGCCGCG                                                                                                                                                                                                                                                                                                                                                                                                                                                                                                                                                                                                                                                                                                                                                                                                                                                                                                                                                                                                                                                                                                                                                                                                                                                                                                                                                                                                                                                                                                                                                                                                                                                                                                                                                                                                                                                                                                                                                      | 3.81802 |  |  | <a href="#">link</a> | <a href="#">link</a> | PWMs     |  |
|     | Description: Conserved regulatory element CGCCGCG between Hs and Mm                                                                                                                                                                                                                                                                                                                                                                                                                                                                                                                                                                                                                                                                                                                                                                                                                                                                                                                                                                                                                                                                                                                                                                                                                                                                                                                                                                                                                                                                                                                                                                                                                                                                                                                                                                                                                                                                                                                             |         |                                                                                     |                                                                                      |                      |                      |          |  |

|     |                                                                                                                                                                                                                                                                                                                                                                                                                                                                                                                                                                                                                                                                                                                                                                                                                                                                                                                                                                                                                                              | All     |      |                | Candidate regions in top 20000 |                      | Database    |
|-----|----------------------------------------------------------------------------------------------------------------------------------------------------------------------------------------------------------------------------------------------------------------------------------------------------------------------------------------------------------------------------------------------------------------------------------------------------------------------------------------------------------------------------------------------------------------------------------------------------------------------------------------------------------------------------------------------------------------------------------------------------------------------------------------------------------------------------------------------------------------------------------------------------------------------------------------------------------------------------------------------------------------------------------------------|---------|------|----------------|--------------------------------|----------------------|-------------|
| #   | Feature                                                                                                                                                                                                                                                                                                                                                                                                                                                                                                                                                                                                                                                                                                                                                                                                                                                                                                                                                                                                                                      | NES     | Logo | Recovery Curve | targets                        |                      |             |
|     | <div><input type="checkbox"/> cisbp__M6479</div> <div>Description: SP1[<b>gene ID:</b> "ENSG00000185591" <b>species:</b> "Homo sapiens" <b>TF status:</b> "direct" <b>TF family:</b> "C2H2 ZF" <b>DBDs:</b> "zf-C2H2"]; SP5[<b>gene ID:</b> "ENSG00000204335" <b>species:</b> "Homo sapiens" <b>TF status:</b> "inferred" <b>TF family:</b> "C2H2 ZF" <b>DBDs:</b> "zf-C2H2"]; SP6[<b>gene ID:</b> "ENSG00000189120" <b>species:</b> "Homo sapiens" <b>TF status:</b> "inferred" <b>TF family:</b> "C2H2 ZF" <b>DBDs:</b> "zf-C2H2"]; SP7[<b>gene ID:</b> "ENSG00000170374" <b>species:</b> "Homo sapiens" <b>TF status:</b> "inferred" <b>TF family:</b> "C2H2 ZF" <b>DBDs:</b> "zf-C2H2"]; SP9[<b>gene ID:</b> "ENSG00000217236" <b>species:</b> "Homo sapiens" <b>TF status:</b> "inferred" <b>TF family:</b> "C2H2 ZF" <b>DBDs:</b> "zf-C2H2"]; SP2[<b>gene ID:</b> "ENSMUSG00000018678" <b>species:</b> "Mus musculus" <b>TF status:</b> "inferred" <b>TF family:</b> "C2H2 ZF" <b>DBDs:</b> "zf-C2H2"]; <b>Possible TFs:</b> SP1</div> | 3.81323 |      |                | <a href="#">link</a>           | <a href="#">link</a> | PWMs        |
| 104 | <div><input type="checkbox"/> transfac_pro__M00375</div> <div>Description: P\$TGA1B_Q2: TGA1b</div>                                                                                                                                                                                                                                                                                                                                                                                                                                                                                                                                                                                                                                                                                                                                                                                                                                                                                                                                          | 3.80934 |      |                | <a href="#">link</a>           | <a href="#">link</a> | PWMs        |
| 106 | <div><input type="checkbox"/> dbcorrd__POLR2A__ENCSR000BHH_1__m1</div> <div>Description: POLR2A (ENCSR000BHH-1, motif 1) <b>Possible TFs:</b> POLR2A</div>                                                                                                                                                                                                                                                                                                                                                                                                                                                                                                                                                                                                                                                                                                                                                                                                                                                                                   | 3.80917 |      |                | <a href="#">link</a>           | <a href="#">link</a> | PWMs        |
| 107 | <div><input type="checkbox"/> cisbp__M4597</div> <div>Description: ATF3[<b>gene ID:</b> "ENSG00000162772" <b>species:</b> "Homo sapiens" <b>TF status:</b> "direct" <b>TF family:</b> "bZIP" <b>DBDs:</b> "bZIP_1"] <b>Possible TFs:</b> ATF3</div>                                                                                                                                                                                                                                                                                                                                                                                                                                                                                                                                                                                                                                                                                                                                                                                          | 3.80594 |      |                | <a href="#">link</a>           | <a href="#">link</a> | PWMs        |
| 108 | <div><input type="checkbox"/> ENCF001WEM</div> <div>Description: DNase-seq on human Caco-2</div>                                                                                                                                                                                                                                                                                                                                                                                                                                                                                                                                                                                                                                                                                                                                                                                                                                                                                                                                             | 3.80360 |      |                | <a href="#">link</a>           | <a href="#">link</a> | DHS & FAIRE |
| 109 | <div><input type="checkbox"/> dbcorrd__PBX3__ENCSR000BGR_1__m2</div> <div>Description: PBX3 (ENCSR000BGR-1, motif 2) <b>Possible TFs:</b> PBX3</div>                                                                                                                                                                                                                                                                                                                                                                                                                                                                                                                                                                                                                                                                                                                                                                                                                                                                                         | 3.80142 |      |                | <a href="#">link</a>           | <a href="#">link</a> | PWMs        |
| 110 | <div><input type="checkbox"/> transfac_pro__M07063</div> <div>Description: V\$SP1_Q3: Sp1 <b>Possible TFs:</b> SP1</div>                                                                                                                                                                                                                                                                                                                                                                                                                                                                                                                                                                                                                                                                                                                                                                                                                                                                                                                     | 3.79268 |      |                | <a href="#">link</a>           | <a href="#">link</a> | PWMs        |
| 111 | <div><input type="checkbox"/> dbcorrd__SREBF1__ENCSR000EEO_1__m2</div> <div>Description: SREBF1 (ENCSR000EEO-1, motif 2) <b>Possible TFs:</b> SREBF1</div>                                                                                                                                                                                                                                                                                                                                                                                                                                                                                                                                                                                                                                                                                                                                                                                                                                                                                   | 3.79158 |      |                | <a href="#">link</a>           | <a href="#">link</a> | PWMs        |

| #   | Feature                                                                                                                            | NES     | Logo                                                                                | Recovery Curve                                                                       | Candidate targets    | All regions in top 20000 | Database    |
|-----|------------------------------------------------------------------------------------------------------------------------------------|---------|-------------------------------------------------------------------------------------|--------------------------------------------------------------------------------------|----------------------|--------------------------|-------------|
| 112 | <input type="checkbox"/> swissregulon_hs__ATF5_CREB3.p2<br>Description: hs__ATF5_CREB3.p2<br>Possible TFs: ATF5, CREB3             | 3.78934 |    |    | <a href="#">link</a> | <a href="#">link</a>     | PWMs        |
| 113 | <input type="checkbox"/> dbcorrd__STAT1_ENCSR000DZM_1__m1<br>Description: STAT1 (ENCSR000DZM-1, motif 1)<br>Possible TFs: STAT1    | 3.78557 |    |    | <a href="#">link</a> | <a href="#">link</a>     | PWMs        |
| 114 | <input type="checkbox"/> transfac_pro__M05438<br>Description: V\$OSX_01: Osx<br>Possible TFs: SP7                                  | 3.78229 |    |    | <a href="#">link</a> | <a href="#">link</a>     | PWMs        |
| 115 | <input type="checkbox"/> transfac_pro__M05554<br>Description: V\$OSX_02: Osx<br>Possible TFs: SP7                                  | 3.77231 |    |    | <a href="#">link</a> | <a href="#">link</a>     | PWMs        |
| 116 | <input type="checkbox"/> transfac_pro__M05040<br>Description: P\$ERF2_04: ERF2 (2)                                                 | 3.77051 |    |    | <a href="#">link</a> | <a href="#">link</a>     | PWMs        |
| 117 | <input type="checkbox"/> ENCF001WCI<br>Description: DNase-seq on human SK-N-SH treated with 6uM retinoic acid for 48 hours         | 3.75690 |                                                                                     |    | <a href="#">link</a> | <a href="#">link</a>     | DHS & FAIRE |
| 118 | <input type="checkbox"/> transfac_pro__M05045<br>Description: P\$DREB2C_01: DREB2C                                                 | 3.74969 |  |  | <a href="#">link</a> | <a href="#">link</a>     | PWMs        |
| 119 | <input type="checkbox"/> dbcorrd__POLR2A_ENCSR000EEP_1__m1<br>Description: POLR2A (ENCSR000EEP-1, motif 1)<br>Possible TFs: POLR2A | 3.74333 |  |  | <a href="#">link</a> | <a href="#">link</a>     | PWMs        |
| 120 | <input type="checkbox"/> transfac_pro__M05042<br>Description: P\$ERF3_03: ERF3                                                     | 3.74167 |  |  | <a href="#">link</a> | <a href="#">link</a>     | PWMs        |
| 121 | <input type="checkbox"/> dbcorrd__ATF3_ENCSR000BKC_1__m2<br>Description: ATF3 (ENCSR000BKC-1, motif 2)<br>Possible TFs: ATF3       | 3.73556 |  |  | <a href="#">link</a> | <a href="#">link</a>     | PWMs        |
| 122 | <input type="checkbox"/> predrem__nrMotif1018<br>Description: 164_fMuscle_arm-DS18080.M145                                         | 3.73346 |  |  | <a href="#">link</a> | <a href="#">link</a>     | PWMs        |
| 123 | <input type="checkbox"/> dbcorrd__BRCA1_ENCSR000EBX_1__m1<br>Description: BRCA1 (ENCSR000EBX-1, motif 1)<br>Possible TFs: BRCA1    | 3.73107 |  |  | <a href="#">link</a> | <a href="#">link</a>     | PWMs        |
| 124 | <input type="checkbox"/> transfac_pro__M05012<br>Description: P\$ERF3_02: ERF3                                                     | 3.72430 |  |  | <a href="#">link</a> | <a href="#">link</a>     | PWMs        |



| #   | Feature                                                                                                                             | NES     | Logo                                                                                | Recovery Curve                                                                       | Candidate targets    | All regions in top 20000 | Database    |
|-----|-------------------------------------------------------------------------------------------------------------------------------------|---------|-------------------------------------------------------------------------------------|--------------------------------------------------------------------------------------|----------------------|--------------------------|-------------|
| 125 | <input type="checkbox"/> dbcorrdB_NFYB_ENCSR000EGQ_1_m1<br>Description: NFYB (ENCSR000EGQ-1, motif 1)<br>Possible TFs: NFYB         | 3.71655 | 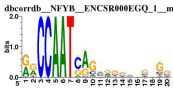   |    | <a href="#">link</a> | <a href="#">link</a>     | PWMs        |
| 126 | <input type="checkbox"/> predrem_nrMotif1831<br>Description: 343_SKNSH-DS8482.M638                                                  | 3.71500 |    |    | <a href="#">link</a> | <a href="#">link</a>     | PWMs        |
| 127 | <input type="checkbox"/> transfac_pro_M05169<br>Description: P\$RRTF1_01: RRTF1                                                     | 3.70580 |    |    | <a href="#">link</a> | <a href="#">link</a>     | PWMs        |
| 128 | <input type="checkbox"/> dbcorrdB_E2F4_ENCSR000EVL_1_m2<br>Description: E2F4 (ENCSR000EVL-1, motif 2)<br>Possible TFs: E2F4         | 3.70567 |    |    | <a href="#">link</a> | <a href="#">link</a>     | PWMs        |
| 129 | <input type="checkbox"/> transfac_pro_M03567<br>Description: V\$SP2_Q3: Sp2<br>Possible TFs: SP2                                    | 3.70350 |    |    | <a href="#">link</a> | <a href="#">link</a>     | PWMs        |
| 130 | <input type="checkbox"/> dbcorrdB_BRCA1_ENCSR000EDY_1_m1<br>Description: BRCA1 (ENCSR000EDY-1, motif 1)<br>Possible TFs: BRCA1      | 3.69946 |    |    | <a href="#">link</a> | <a href="#">link</a>     | PWMs        |
| 131 | <input type="checkbox"/> jasper_MA0443.1<br>Description: btd<br>Possible TFs: SP1, SP2, SP3, SP4                                    | 3.69544 |  |  | <a href="#">link</a> | <a href="#">link</a>     | PWMs        |
| 132 | <input type="checkbox"/> dbcorrdB_NFYA_ENCSR000EGR_1_m1<br>Description: NFYA (ENCSR000EGR-1, motif 1)<br>Possible TFs: NFYA         | 3.69360 |  |  | <a href="#">link</a> | <a href="#">link</a>     | PWMs        |
| 133 | <input type="checkbox"/> transfac_pro_M05311<br>Description: V\$TIEG1_01: TIEG-1<br>Possible TFs: KLF10                             | 3.68152 |  |  | <a href="#">link</a> | <a href="#">link</a>     | PWMs        |
| 134 | <input type="checkbox"/> taipale_cyt_meth_SP3_NRCCMCGCCCMYN_eDBD_meth<br>Description: SP3 [Znf_C2H2, CpG-meth]<br>Possible TFs: SP3 | 3.68081 |  |  | <a href="#">link</a> | <a href="#">link</a>     | PWMs        |
| 135 | <input type="checkbox"/> transfac_pro_M05067<br>Description: P\$AT5G25190_01: At5g25190                                             | 3.67603 |  |  | <a href="#">link</a> | <a href="#">link</a>     | PWMs        |
| 136 | <input type="checkbox"/> dbcorrdB_EZH2_ENCSR000AQE_1_m9<br>Description: EZH2 (ENCSR000AQE-1, motif 9)<br>Possible TFs: EZH2         | 3.67581 |  |  | <a href="#">link</a> | <a href="#">link</a>     | PWMs        |
| 137 | <input type="checkbox"/> ENCF001SQC<br>Description: DNase-seq on human Caco-2                                                       | 3.67002 |                                                                                     |  | <a href="#">link</a> | <a href="#">link</a>     | DHS & FAIRE |

| #   | Feature                                                                                                                               | NES     | Logo                                                                                | Recovery Curve                                                                       | Candidate targets<br>link | All regions in top 20000<br>link | Database<br>link      |
|-----|---------------------------------------------------------------------------------------------------------------------------------------|---------|-------------------------------------------------------------------------------------|--------------------------------------------------------------------------------------|---------------------------|----------------------------------|-----------------------|
| 138 | <input type="checkbox"/> transfac_pro__M06796<br>Description: V\$BTEB1_01: BTEB1                                                      | 3.66785 | 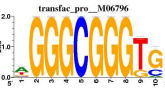   |    | <a href="#">link</a>      | <a href="#">link</a>             | PWMs                  |
| 139 | <input type="checkbox"/> cisbp__M0270<br>Description: M0270                                                                           | 3.66716 |    |    | <a href="#">link</a>      | <a href="#">link</a>             | PWMs                  |
| 140 | <input type="checkbox"/> elemento__CGTCACG<br>Description: Conserved regulatory element CGTCACG between Hs and Mm                     | 3.66591 |    |    | <a href="#">link</a>      | <a href="#">link</a>             | PWMs                  |
| 141 | <input type="checkbox"/> ENCF001WEL<br>Description: DNase-seq on human Caco-2                                                         | 3.66431 |                                                                                     |    | <a href="#">link</a>      | <a href="#">link</a>             | DHS & FAIRE           |
| 142 | <input type="checkbox"/> ENCF001WGI<br>Description: DNase-seq on human H7-hESC differentiated for 9 days                              | 3.65360 |                                                                                     |    | <a href="#">link</a>      | <a href="#">link</a>             | DHS & FAIRE           |
| 143 | <input type="checkbox"/> taipale_cyt_meth__SP9_NCCACGCCCMYN_eDBD<br>Description: SP9 [ZNF_C2H2]<br>Possible TFs: SP9                  | 3.65275 |    |   | <a href="#">link</a>      | <a href="#">link</a>             | PWMs                  |
| 144 | <input type="checkbox"/> flyfactorsurvey__btd_NAR_FBgn0000233<br>Description: btd_NAR_FBgn0000233<br>Possible TFs: SP1, SP2, SP3, SP4 | 3.64724 |  |  | <a href="#">link</a>      | <a href="#">link</a>             | PWMs                  |
| 145 | <input type="checkbox"/> E125-H4K20me1-broadpeak<br>Description: H4K20me1 in NH-A Astrocytes Primary Cells (E125, broadpeak)          | 3.64668 |                                                                                     |  | <a href="#">link</a>      | <a href="#">link</a>             | Histone modifications |
| 146 | <input type="checkbox"/> ENCF001SSI<br>Description: DNase-seq on human SK-N-SH treated with 6uM retinoic acid for 48 hours            | 3.64545 |                                                                                     |  | <a href="#">link</a>      | <a href="#">link</a>             | DHS & FAIRE           |
| 147 | <input type="checkbox"/> ENCF001WSU<br>Description: DNase-seq on human SK-N-SH treated with 6uM retinoic acid for 48 hours            | 3.64393 |                                                                                     |  | <a href="#">link</a>      | <a href="#">link</a>             | DHS & FAIRE           |
| 148 | <input type="checkbox"/> cisbp__M0088<br>Description: M0088                                                                           | 3.63738 |  |  | <a href="#">link</a>      | <a href="#">link</a>             | PWMs                  |
| 149 | <input type="checkbox"/> transfac_pro__M05312<br>Description: V\$FKLF_01: FKLF<br>Possible TFs: KLF11                                 | 3.63556 |  |  | <a href="#">link</a>      | <a href="#">link</a>             | PWMs                  |
| 150 | <input type="checkbox"/> hdp1__RBM17<br>Description: RBM17<br>Possible TFs: RBM17                                                     | 3.63485 |  |  | <a href="#">link</a>      | <a href="#">link</a>             | PWMs                  |

|     |                                                                                                                                                 |         |                                                                                     |                                                                                      | All                  |                      |             |
|-----|-------------------------------------------------------------------------------------------------------------------------------------------------|---------|-------------------------------------------------------------------------------------|--------------------------------------------------------------------------------------|----------------------|----------------------|-------------|
| #   | Feature                                                                                                                                         | NES     | Logo                                                                                | Recovery Curve                                                                       | Candidate targets    | regions in top 20000 | Database    |
| 151 | <input type="checkbox"/> jaspar__MA1053.1<br>Description: ERF109                                                                                | 3.63406 | 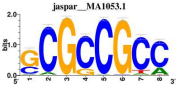   |    | <a href="#">link</a> | <a href="#">link</a> | PWMs        |
| 152 | <input type="checkbox"/> ENCF001VZI<br>Description: DNase-seq on human HA-h                                                                     | 3.63144 |                                                                                     |    | <a href="#">link</a> | <a href="#">link</a> | DHS & FAIRE |
| 153 | <input type="checkbox"/> flyfactorsurvey__Sp1_SANGER_5_FBgn0020378<br>Description: Sp1_SANGER_5_FBgn0020378<br>Possible TFs: SP8, SP9, SP6, SP7 | 3.63077 |    |    | <a href="#">link</a> | <a href="#">link</a> | PWMs        |
| 154 | <input type="checkbox"/> dbcorrd__MXI1__ENCSR000EIA_1__m4<br>Description: MXI1 (ENCSR000EIA-1, motif 4)<br>Possible TFs: MXI1                   | 3.63076 |    |    | <a href="#">link</a> | <a href="#">link</a> | PWMs        |
| 155 | <input type="checkbox"/> taipale_cyt_meth__SP8_NCCACGCCCMYN_eDBD_meth<br>Description: SP8 [Znf_C2H2, CpG-meth]<br>Possible TFs: SP8             | 3.62997 |    |    | <a href="#">link</a> | <a href="#">link</a> | PWMs        |
| 156 | <input type="checkbox"/> ENCF001VZA<br>Description: DNase-seq on human GM06990                                                                  | 3.62861 |                                                                                     |    | <a href="#">link</a> | <a href="#">link</a> | DHS & FAIRE |
| 157 | <input type="checkbox"/> transfac_pro__M05095<br>Description: P\$ATERF11_01: ATERF11                                                            | 3.62712 |  |  | <a href="#">link</a> | <a href="#">link</a> | PWMs        |
| 158 | <input type="checkbox"/> ENCF001WFK<br>Description: DNase-seq on human GM06990                                                                  | 3.62541 |                                                                                     |  | <a href="#">link</a> | <a href="#">link</a> | DHS & FAIRE |

|     |                                                                                                                                                                                                                                                                                                                                                                                                                                                                                                                                                                                                                                                                                                                                                                                                                                                                                                                                                                                                                                       |         |      |                | All                  |                      | Database |
|-----|---------------------------------------------------------------------------------------------------------------------------------------------------------------------------------------------------------------------------------------------------------------------------------------------------------------------------------------------------------------------------------------------------------------------------------------------------------------------------------------------------------------------------------------------------------------------------------------------------------------------------------------------------------------------------------------------------------------------------------------------------------------------------------------------------------------------------------------------------------------------------------------------------------------------------------------------------------------------------------------------------------------------------------------|---------|------|----------------|----------------------|----------------------|----------|
| #   | Feature                                                                                                                                                                                                                                                                                                                                                                                                                                                                                                                                                                                                                                                                                                                                                                                                                                                                                                                                                                                                                               | NES     | Logo | Recovery Curve | Candidate targets    | regions in top 20000 |          |
|     | <div><input type="checkbox"/> cisbp__M6480</div> <div>Description: SP1[<b>gene ID:</b> "ENSG00000185591" <b>species:</b> "Homo sapiens" <b>TF status:</b> "direct" <b>TF family:</b> "C2H2 ZF" <b>DBDs:</b> "zf-C2H2"]; SP5[<b>gene ID:</b> "ENSG00000204335" <b>species:</b> "Homo sapiens" <b>TF status:</b> "inferred" <b>TF family:</b> "C2H2 ZF" <b>DBDs:</b> "zf-C2H2"]; SP6[<b>gene ID:</b> "ENSG00000189120" <b>species:</b> "Homo sapiens" <b>TF status:</b> "inferred" <b>TF family:</b> "C2H2 ZF" <b>DBDs:</b> "zf-C2H2"]; SP7[<b>gene ID:</b> "ENSG00000170374" <b>species:</b> "Homo sapiens" <b>TF status:</b> "inferred" <b>TF family:</b> "C2H2 ZF" <b>DBDs:</b> "zf-C2H2"]; SP9[<b>gene ID:</b> "ENSG00000217236" <b>species:</b> "Homo sapiens" <b>TF status:</b> "inferred" <b>TF family:</b> "C2H2 ZF" <b>DBDs:</b> "zf-C2H2"]; Sp2[<b>gene ID:</b> "ENSMUSG00000018678" <b>species:</b> "Mus musculus" <b>TF status:</b> "inferred" <b>TF family:</b> "C2H2 ZF" <b>DBDs:</b> "zf-C2H2"]; Possible TFs: SP1</div> | 3.62504 |      |                | <a href="#">link</a> | <a href="#">link</a> | PWMs     |
| 159 | <div><input type="checkbox"/> Sp3[<b>gene ID:</b> "ENSMUSG00000027109" <b>species:</b> "Mus musculus" <b>TF status:</b> "inferred" <b>TF family:</b> "C2H2 ZF" <b>DBDs:</b> "zf-C2H2"]; Sp5[<b>gene ID:</b> "ENSMUSG00000075304" <b>species:</b> "Mus musculus" <b>TF status:</b> "inferred" <b>TF family:</b> "C2H2 ZF" <b>DBDs:</b> "zf-C2H2"]; Sp6[<b>gene ID:</b> "ENSMUSG00000038560" <b>species:</b> "Mus musculus" <b>TF status:</b> "inferred" <b>TF family:</b> "C2H2 ZF" <b>DBDs:</b> "zf-C2H2"]; Sp7[<b>gene ID:</b> "ENSMUSG00000060284" <b>species:</b> "Mus musculus" <b>TF status:</b> "inferred" <b>TF family:</b> "C2H2 ZF" <b>DBDs:</b> "zf-C2H2"]; Sp8[<b>gene ID:</b> "ENSMUSG00000048562" <b>species:</b> "Mus musculus" <b>TF status:</b> "inferred" <b>TF family:</b> "C2H2 ZF" <b>DBDs:</b> "zf-C2H2"]; Sp9[<b>gene ID:</b> "ENSMUSG00000068859" <b>species:</b> "Mus musculus" <b>TF status:</b> "inferred" <b>TF family:</b> "C2H2 ZF" <b>DBDs:</b> "zf-C2H2"]; Possible TFs: SP1</div>                     |         |      |                |                      |                      |          |
| 160 | <div><input type="checkbox"/> transfac_pro__M07520</div> <div>Description: P\$RAP26_03: RAP2-6</div>                                                                                                                                                                                                                                                                                                                                                                                                                                                                                                                                                                                                                                                                                                                                                                                                                                                                                                                                  | 3.62357 |      |                | <a href="#">link</a> | <a href="#">link</a> | PWMs     |
| 161 | <div><input type="checkbox"/> dbcorrd__SREBF2__ENCNR000DYT_1__m7</div> <div>Description: SREBF2 (ENCNR000DYT-1, motif 7)<br/>Possible TFs: SREBF2</div>                                                                                                                                                                                                                                                                                                                                                                                                                                                                                                                                                                                                                                                                                                                                                                                                                                                                               | 3.61699 |      |                | <a href="#">link</a> | <a href="#">link</a> | PWMs     |
| 162 | <div><input type="checkbox"/> jaspar__MA1047.1</div> <div>Description: TGA5</div>                                                                                                                                                                                                                                                                                                                                                                                                                                                                                                                                                                                                                                                                                                                                                                                                                                                                                                                                                     | 3.61636 |      |                | <a href="#">link</a> | <a href="#">link</a> | PWMs     |
| 163 | <div><input type="checkbox"/> elemento__AGCCGCG</div> <div>Description: Conserved regulatory element AGCCGCG between Hs and Mm</div>                                                                                                                                                                                                                                                                                                                                                                                                                                                                                                                                                                                                                                                                                                                                                                                                                                                                                                  | 3.61361 |      |                | <a href="#">link</a> | <a href="#">link</a> | PWMs     |
| 164 | <div><input type="checkbox"/> dbcorrd__NRF1__ENCNR000EHZ_1__m1</div> <div>Description: NRF1 (ENCNR000EHZ-1, motif 1)<br/>Possible TFs: NRF1</div>                                                                                                                                                                                                                                                                                                                                                                                                                                                                                                                                                                                                                                                                                                                                                                                                                                                                                     | 3.61134 |      |                | <a href="#">link</a> | <a href="#">link</a> | PWMs     |
| 165 | <div><input type="checkbox"/> dbcorrd__NRF1__ENCNR000EDJ_1__m1</div> <div>Description: NRF1 (ENCNR000EDJ-1, motif 1)<br/>Possible TFs: NRF1</div>                                                                                                                                                                                                                                                                                                                                                                                                                                                                                                                                                                                                                                                                                                                                                                                                                                                                                     | 3.61063 |      |                | <a href="#">link</a> | <a href="#">link</a> | PWMs     |
| 166 | <div><input type="checkbox"/> elemento__CGCGGCC</div> <div>Description: Conserved regulatory element CGCGGCC between Hs and Mm</div>                                                                                                                                                                                                                                                                                                                                                                                                                                                                                                                                                                                                                                                                                                                                                                                                                                                                                                  | 3.60966 |      |                | <a href="#">link</a> | <a href="#">link</a> | PWMs     |

| #   | Feature                                                                                                                                                                                                                                                                                                      | NES     | Logo                                                                                | Recovery Curve                                                                       | Candidate targets    | All regions in top 20000 | Database    |
|-----|--------------------------------------------------------------------------------------------------------------------------------------------------------------------------------------------------------------------------------------------------------------------------------------------------------------|---------|-------------------------------------------------------------------------------------|--------------------------------------------------------------------------------------|----------------------|--------------------------|-------------|
| 167 | <input type="checkbox"/> dbcorrdB_ZBTB33_ENCSR000BHR_1__m1<br>Description: ZBTB33 (ENCSR000BHR-1, motif 1)<br>Possible TFs: ZBTB33                                                                                                                                                                           | 3.60307 | 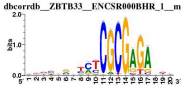   |    | <a href="#">link</a> | <a href="#">link</a>     | PWMs        |
| 168 | <input type="checkbox"/> transfac_pro_M05360<br>Description: V\$TIEG1_02: TIEG-1<br>Possible TFs: KLF10                                                                                                                                                                                                      | 3.60288 |    |    | <a href="#">link</a> | <a href="#">link</a>     | PWMs        |
| 169 | <input type="checkbox"/> cisbp_M3088<br>Description: ATF2[ gene ID: "ENSG00000115966" species: "Homo sapiens" TF status: "direct" TF family: "bZIP" DBDs: "bZIP_1"]; CREB5[ gene ID: "ENSG00000146592" species: "Homo sapiens" TF status: "inferred" TF family: "bZIP" DBDs: "bZIP_1"]<br>Possible TFs: ATF2 | 3.59751 |    |    | <a href="#">link</a> | <a href="#">link</a>     | PWMs        |
| 170 | <input type="checkbox"/> cisbp_M1553<br>Description: M1553                                                                                                                                                                                                                                                   | 3.59666 |    |    | <a href="#">link</a> | <a href="#">link</a>     | PWMs        |
| 171 | <input type="checkbox"/> transfac_pro_M05332<br>Description: V\$SP2_05: Sp2<br>Possible TFs: SP2                                                                                                                                                                                                             | 3.59087 |    |    | <a href="#">link</a> | <a href="#">link</a>     | PWMs        |
| 172 | <input type="checkbox"/> transfac_pro_M04971<br>Description: P\$WRAF1_01: WRAF1                                                                                                                                                                                                                              | 3.58943 |   |   | <a href="#">link</a> | <a href="#">link</a>     | PWMs        |
| 173 | <input type="checkbox"/> dbcorrdB_FOS_ENCSR000FAI_1__m1<br>Description: FOS (ENCSR000FAI-1, motif 1)<br>Possible TFs: FOS                                                                                                                                                                                    | 3.58926 |  |  | <a href="#">link</a> | <a href="#">link</a>     | PWMs        |
| 174 | <input type="checkbox"/> factorbook_NFY<br>Description: NFY<br>Possible TFs: NFYB, NFYA                                                                                                                                                                                                                      | 3.58824 |  |  | <a href="#">link</a> | <a href="#">link</a>     | PWMs        |
| 175 | <input type="checkbox"/> ENCF001WNK<br>Description: DNase-seq on human Jurkat                                                                                                                                                                                                                                | 3.58736 |                                                                                     |  | <a href="#">link</a> | <a href="#">link</a>     | DHS & FAIRE |
| 176 | <input type="checkbox"/> transfac_pro_M00376<br>Description: P\$TGA1A_Q2: TGA1a                                                                                                                                                                                                                              | 3.58598 |  |  | <a href="#">link</a> | <a href="#">link</a>     | PWMs        |
| 177 | <input type="checkbox"/> factorbook_CREB-ext<br>Description: CREB-ext<br>Possible TFs: ATF3                                                                                                                                                                                                                  | 3.58520 |  |  | <a href="#">link</a> | <a href="#">link</a>     | PWMs        |
| 178 | <input type="checkbox"/> dbcorrdB_POLR2A_ENCSR000DLV_1__m1<br>Description: POLR2A (ENCSR000DLV-1, motif 1)<br>Possible TFs: POLR2A                                                                                                                                                                           | 3.58357 |  |  | <a href="#">link</a> | <a href="#">link</a>     | PWMs        |
| 179 | <input type="checkbox"/> hdpi_TRIM21<br>Description: TRIM21<br>Possible TFs: TRIM21                                                                                                                                                                                                                          | 3.58337 |  |  | <a href="#">link</a> | <a href="#">link</a>     | PWMs        |



| #   | Feature                                                                                                                                                                                     | NES     | Logo                                                                                | Recovery Curve                                                                       | Candidate targets    | All regions in top 20000 | Database |
|-----|---------------------------------------------------------------------------------------------------------------------------------------------------------------------------------------------|---------|-------------------------------------------------------------------------------------|--------------------------------------------------------------------------------------|----------------------|--------------------------|----------|
| 180 | <input type="checkbox"/> transfac_pro_M04991<br>Description: P\$ERF4_01: ERF-4                                                                                                              | 3.57908 |    |    | <a href="#">link</a> | <a href="#">link</a>     | PWMs     |
| 181 | <input type="checkbox"/> dbcorrdB_POLR2A_ENCSR000EUU_1__m1<br>Description: POLR2A (ENCSR000EUU-1, motif 1)<br>Possible TFs: POLR2A                                                          | 3.57716 |    |    | <a href="#">link</a> | <a href="#">link</a>     | PWMs     |
| 182 | <input type="checkbox"/> transfac_pro_M05361<br>Description: V\$SP6_01: Sp6<br>Possible TFs: SP6                                                                                            | 3.57618 |    |    | <a href="#">link</a> | <a href="#">link</a>     | PWMs     |
| 183 | <input type="checkbox"/> cisbp_M1781<br>Description: RSC3[gene ID: "YDR303C" species: "Saccharomyces cerevisiae" TF status: "direct" TF family: "Zinc cluster" DBDs: "Zn_clus"]             | 3.57538 |    |    | <a href="#">link</a> | <a href="#">link</a>     | PWMs     |
| 184 | <input type="checkbox"/> transfac_pro_M05665<br>Description: V\$SP3_02: Sp3<br>Possible TFs: SP3                                                                                            | 3.57177 |    |    | <a href="#">link</a> | <a href="#">link</a>     | PWMs     |
| 185 | <input type="checkbox"/> taipale_cyt_meth_SP9_NCCACGCCCMYN_eDBD_meth<br>Description: SP9 [Znf_C2H2, CpG-meth]<br>Possible TFs: SP9                                                          | 3.57098 |    |    | <a href="#">link</a> | <a href="#">link</a>     | PWMs     |
| 186 | <input type="checkbox"/> dbcorrdB_NRF1_ENCSR000EHH_1__m1<br>Description: NRF1 (ENCSR000EHH-1, motif 1)<br>Possible TFs: NRF1                                                                | 3.56964 |  |  | <a href="#">link</a> | <a href="#">link</a>     | PWMs     |
| 187 | <input type="checkbox"/> transfac_pro_M05455<br>Description: V\$SP6_02: SP6<br>Possible TFs: SP6                                                                                            | 3.56657 |  |  | <a href="#">link</a> | <a href="#">link</a>     | PWMs     |
| 188 | <input type="checkbox"/> transfac_pro_M04998<br>Description: P\$OPBP1_01: OPBP1                                                                                                             | 3.56614 |  |  | <a href="#">link</a> | <a href="#">link</a>     | PWMs     |
| 189 | <input type="checkbox"/> cisbp_M1551<br>Description: Gmeb2[gene ID: "ENSMUSG00000038705" species: "Mus musculus" TF status: "direct" TF family: "SAND" DBDs: "SAND"]<br>Possible TFs: GMEB2 | 3.56215 |  |  | <a href="#">link</a> | <a href="#">link</a>     | PWMs     |
| 190 | <input type="checkbox"/> dbcorrdB_CHD2_ENCSR000ECP_1__m1<br>Description: CHD2 (ENCSR000ECP-1, motif 1)<br>Possible TFs: CHD2                                                                | 3.55907 |  |  | <a href="#">link</a> | <a href="#">link</a>     | PWMs     |
| 191 | <input type="checkbox"/> predrem_nrMotif1814<br>Description: 304_hTH1-DS7840.M463                                                                                                           | 3.55155 |  |  | <a href="#">link</a> | <a href="#">link</a>     | PWMs     |
| 192 | <input type="checkbox"/> swissregulon_hs_CREB1.p2<br>Description: hs_CREB1.p2<br>Possible TFs: CREB1                                                                                        | 3.55082 |  |  | <a href="#">link</a> | <a href="#">link</a>     | PWMs     |

| #   | Feature                                                                                                                                                      | NES     | Logo | Recovery Curve | Candidate targets    | All regions in top 20000 |             |
|-----|--------------------------------------------------------------------------------------------------------------------------------------------------------------|---------|------|----------------|----------------------|--------------------------|-------------|
|     |                                                                                                                                                              |         |      |                |                      | Database                 |             |
| 193 | <input type="checkbox"/> taipale_cyt_meth_KLF13_NRCCACGCCCMYN_eDBD_meth<br>Description: KLF13 [Znf_C2H2, CpG-meth]<br>Possible TFs: KLF13                    | 3.54834 |      |                | <a href="#">link</a> | <a href="#">link</a>     | PWMs        |
| 194 | <input type="checkbox"/> taipale_cyt_meth_CREM_NRTGACGTCAYN_eDBD<br>Description: CREM [bZIP]<br>Possible TFs: CREM                                           | 3.54397 |      |                | <a href="#">link</a> | <a href="#">link</a>     | PWMs        |
| 195 | <input type="checkbox"/> dbcorrdB_SP1_ENCSR000BKO_1_m1<br>Description: SP1 (ENCSR000BKO-1, motif 1)<br>Possible TFs: SP1                                     | 3.54168 |      |                | <a href="#">link</a> | <a href="#">link</a>     | PWMs        |
| 196 | <input type="checkbox"/> transfac_public_M00287<br>Description: V\$NFY_01: NF-Y<br>Possible TFs: NFYB                                                        | 3.54123 |      |                | <a href="#">link</a> | <a href="#">link</a>     | PWMs        |
| 197 | <input type="checkbox"/> factorbook_NRF1<br>Description: NRF1<br>Possible TFs: NRF1                                                                          | 3.53952 |      |                | <a href="#">link</a> | <a href="#">link</a>     | PWMs        |
| 198 | <input type="checkbox"/> jaspar_MA1052.1<br>Description: RAP2-6                                                                                              | 3.53673 |      |                | <a href="#">link</a> | <a href="#">link</a>     | PWMs        |
| 199 | <input type="checkbox"/> dbcorrdB_IRF3_ENCSR000EEJ_1_m1<br>Description: IRF3 (ENCSR000EEJ-1, motif 1)<br>Possible TFs: IRF3                                  | 3.53312 |      |                | <a href="#">link</a> | <a href="#">link</a>     | PWMs        |
| 200 | <input type="checkbox"/> ENCF001WFJ<br>Description: DNase-seq on human GM06990                                                                               | 3.52485 |      |                | <a href="#">link</a> | <a href="#">link</a>     | DHS & FAIRE |
| 201 | <input type="checkbox"/> predrem_nrMotif2348<br>Description: 164_fMuscle_arm-DS18080.M589                                                                    | 3.52366 |      |                | <a href="#">link</a> | <a href="#">link</a>     | PWMs        |
| 202 | <input type="checkbox"/> ENCF001SQG<br>Description: DNase-seq on human GM06990                                                                               | 3.52217 |      |                | <a href="#">link</a> | <a href="#">link</a>     | DHS & FAIRE |
| 203 | <input type="checkbox"/> dbcorrdB_HDAC2_ENCSR000AQG_1_m4<br>Description: HDAC2 (ENCSR000AQG-1, motif 4)<br>Possible TFs: HDAC2                               | 3.51625 |      |                | <a href="#">link</a> | <a href="#">link</a>     | PWMs        |
| 204 | <input type="checkbox"/> transfac_pro_M00981<br>Description: V\$CREBATF_Q6: CREB, ATF<br>Possible TFs: CREB1, CREM, ATF5, ATF4, ATF7, ATF6, ATF1, ATF3, ATF2 | 3.50682 |      |                | <a href="#">link</a> | <a href="#">link</a>     | PWMs        |
| 205 | <input type="checkbox"/> transfac_pro_M05138<br>Description: P\$ATERF8_01: ATERF8                                                                            | 3.50434 |      |                | <a href="#">link</a> | <a href="#">link</a>     | PWMs        |

|     |                                                                                                                                                                                                                                                                                                                                                                                                                             |         |      |                | All                  |                      |             |
|-----|-----------------------------------------------------------------------------------------------------------------------------------------------------------------------------------------------------------------------------------------------------------------------------------------------------------------------------------------------------------------------------------------------------------------------------|---------|------|----------------|----------------------|----------------------|-------------|
| #   | Feature                                                                                                                                                                                                                                                                                                                                                                                                                     | NES     | Logo | Recovery Curve | Candidate targets    | regions in top 20000 | Database    |
| 206 | <div><input type="checkbox"/> dbcorrdB__NRF1__ENCSR000DZO_1__m1</div> <div>Description: NRF1 (ENCSR000DZO-1, motif 1)</div> <div>Possible TFs: NRF1</div>                                                                                                                                                                                                                                                                   | 3.50430 |      |                | <a href="#">link</a> | <a href="#">link</a> | PWMs        |
| 207 | <div><input type="checkbox"/> cisbp__M0613</div> <div>Description: Mbd1[<i>gene ID: "ENSMUSG00000024561"</i> species: "<i>Mus musculus</i>" TF status: "<i>direct</i>" TF family: "<i>CxxC</i>" DBDs: "<i>zf-CXXC</i>"]</div> <div>Possible TFs: MBD1</div>                                                                                                                                                                 | 3.50188 |      |                | <a href="#">link</a> | <a href="#">link</a> | PWMs        |
| 208 | <div><input type="checkbox"/> ENCF001WCO</div> <div>Description: DNase-seq on human Th1</div>                                                                                                                                                                                                                                                                                                                               | 3.50125 |      |                | <a href="#">link</a> | <a href="#">link</a> | DHS & FAIRE |
| 209 | <div><input type="checkbox"/> transfac_pro__M05557</div> <div>Description: V\$BTEB3_01: BTEB3</div> <div>Possible TFs: KLF13</div>                                                                                                                                                                                                                                                                                          | 3.49987 |      |                | <a href="#">link</a> | <a href="#">link</a> | PWMs        |
| 210 | <div><input type="checkbox"/> transfac_pro__M07302</div> <div>Description: V\$NFY_Q3: NF-Y</div> <div>Possible TFs: NFYC, NFYB, NFYA</div>                                                                                                                                                                                                                                                                                  | 3.49089 |      |                | <a href="#">link</a> | <a href="#">link</a> | PWMs        |
| 211 | <div><input type="checkbox"/> cisbp__M0297</div> <div>Description: Creb1[<i>gene ID: "ENSMUSG00000025958"</i> species: "<i>Mus musculus</i>" TF status: "<i>direct</i>" TF family: "<i>bZIP</i>" DBDs: "<i>bZIP_1</i>"; CrebB-17A[<i>gene ID: "FBgn0014467"</i> species: "<i>Drosophila melanogaster</i>" TF status: "<i>inferred</i>" TF family: "<i>bZIP</i>" DBDs: "<i>bZIP_1</i>"]</div> <div>Possible TFs: CREB1</div> | 3.48970 |      |                | <a href="#">link</a> | <a href="#">link</a> | PWMs        |
| 212 | <div><input type="checkbox"/> dbcorrdB__YY1__ENCSR000EXG_1__m2</div> <div>Description: YY1 (ENCSR000EXG-1, motif 2)</div> <div>Possible TFs: YY1</div>                                                                                                                                                                                                                                                                      | 3.48706 |      |                | <a href="#">link</a> | <a href="#">link</a> | PWMs        |
| 213 | <div><input type="checkbox"/> jasper_MA0604.1</div> <div>Description: Atf1</div> <div>Possible TFs: ATF1</div>                                                                                                                                                                                                                                                                                                              | 3.48531 |      |                | <a href="#">link</a> | <a href="#">link</a> | PWMs        |
| 214 | <div><input type="checkbox"/> transfac_pro__M00944</div> <div>Description: P\$CPRF3_01: CPRF-3</div>                                                                                                                                                                                                                                                                                                                        | 3.48500 |      |                | <a href="#">link</a> | <a href="#">link</a> | PWMs        |
| 215 | <div><input type="checkbox"/> taipale_cyt_meth__KLF13_NRCCACGCCCMYN_FL_meth</div> <div>Description: KLF13 [<i>Znf_C2H2</i>, CpG-meth]</div> <div>Possible TFs: KLF13</div>                                                                                                                                                                                                                                                  | 3.47908 |      |                | <a href="#">link</a> | <a href="#">link</a> | PWMs        |
| 216 | <div><input type="checkbox"/> transfac_pro__M03544</div> <div>Description: V\$CREB1_Q6: CREB1</div> <div>Possible TFs: CREB1</div>                                                                                                                                                                                                                                                                                          | 3.47631 |      |                | <a href="#">link</a> | <a href="#">link</a> | PWMs        |
| 217 | <div><input type="checkbox"/> transfac_pro__M02106</div> <div>Description: V\$NFYA_Q5: NF-YA</div> <div>Possible TFs: NFYA</div>                                                                                                                                                                                                                                                                                            | 3.47246 |      |                | <a href="#">link</a> | <a href="#">link</a> | PWMs        |

|     |                                                                                                                                                                                                                                                                                                                                                                                                                              |         |                                                                                     |                                                                                      | All                  |                      |             |
|-----|------------------------------------------------------------------------------------------------------------------------------------------------------------------------------------------------------------------------------------------------------------------------------------------------------------------------------------------------------------------------------------------------------------------------------|---------|-------------------------------------------------------------------------------------|--------------------------------------------------------------------------------------|----------------------|----------------------|-------------|
| #   | Feature                                                                                                                                                                                                                                                                                                                                                                                                                      | NES     | Logo                                                                                | Recovery Curve                                                                       | Candidate targets    | regions in top 20000 | Database    |
| 218 | <input type="checkbox"/> transfac_pro_M01928<br>Description: F\$HAL9_02: HAL9                                                                                                                                                                                                                                                                                                                                                | 3.46914 |    |    | <a href="#">link</a> | <a href="#">link</a> | PWMs        |
| 219 | <input type="checkbox"/> predrem_nrMotif1895<br>Description: 205_fMuscle_upper_back-DS19283.M616                                                                                                                                                                                                                                                                                                                             | 3.46907 |    |    | <a href="#">link</a> | <a href="#">link</a> | PWMs        |
| 220 | <input type="checkbox"/> cisbp_M0295<br>Description: Atf1[ <i>gene ID</i> : "ENSMUSG00000023027" <i>species</i> : " <i>Mus musculus</i> " <i>TF status</i> : "direct" <i>TF family</i> : "bZIP" <i>DBDs</i> : "bZIP_1"]; CrebB-17A[ <i>gene ID</i> : "FBgn0014467" <i>species</i> : " <i>Drosophila melanogaster</i> " <i>TF status</i> : "inferred" <i>TF family</i> : "bZIP" <i>DBDs</i> : "bZIP_1"]<br>Possible TFs: ATF1 | 3.46879 |    |    | <a href="#">link</a> | <a href="#">link</a> | PWMs        |
| 221 | <input type="checkbox"/> taipale_cyt_meth_KLF13_NRCCACGCCCMYN_FL_repr<br>Description: KLF13 [ <i>Znf_C2H2</i> ]<br>Possible TFs: KLF13                                                                                                                                                                                                                                                                                       | 3.46877 |    |    | <a href="#">link</a> | <a href="#">link</a> | PWMs        |
| 222 | <input type="checkbox"/> dbcorrdB_RFX5_ENCSR000DZW_1_m2<br>Description: RFX5 (ENCSR000DZW-1, motif 2)<br>Possible TFs: RFX5                                                                                                                                                                                                                                                                                                  | 3.46757 |    |    | <a href="#">link</a> | <a href="#">link</a> | PWMs        |
| 223 | <input type="checkbox"/> jasper_MA0311.1<br>Description: HAL9                                                                                                                                                                                                                                                                                                                                                                | 3.46680 |   |   | <a href="#">link</a> | <a href="#">link</a> | PWMs        |
| 224 | <input type="checkbox"/> dbcorrdB_NRF1_ENCSR000ECC_1_m1<br>Description: NRF1 (ENCSR000ECC-1, motif 1)<br>Possible TFs: NRF1                                                                                                                                                                                                                                                                                                  | 3.46661 |  |  | <a href="#">link</a> | <a href="#">link</a> | PWMs        |
| 225 | <input type="checkbox"/> ENCF001WTE<br>Description: DNase-seq on human Th1                                                                                                                                                                                                                                                                                                                                                   | 3.46095 |                                                                                     |  | <a href="#">link</a> | <a href="#">link</a> | DHS & FAIRE |
| 226 | <input type="checkbox"/> scertf_badis.CST6<br>Description: badis.CST6                                                                                                                                                                                                                                                                                                                                                        | 3.46000 |  |  | <a href="#">link</a> | <a href="#">link</a> | PWMs        |
| 227 | <input type="checkbox"/> dbcorrdB_NRF1_ENCSR000EEH_1_m1<br>Description: NRF1 (ENCSR000EEH-1, motif 1)<br>Possible TFs: NRF1                                                                                                                                                                                                                                                                                                  | 3.45960 |  |  | <a href="#">link</a> | <a href="#">link</a> | PWMs        |
| 228 | <input type="checkbox"/> transfac_pro_M05000<br>Description: P\$ERF112_01: ERF112                                                                                                                                                                                                                                                                                                                                            | 3.45904 |  |  | <a href="#">link</a> | <a href="#">link</a> | PWMs        |
| 229 | <input type="checkbox"/> swissregulon_sacCer_RSC3<br>Description: sacCer_RSC3                                                                                                                                                                                                                                                                                                                                                | 3.44720 |  |  | <a href="#">link</a> | <a href="#">link</a> | PWMs        |
| 230 | <input type="checkbox"/> dbcorrdB_ATF3_ENCSR000BKE_1_m2<br>Description: ATF3 (ENCSR000BKE-1, motif 2)<br>Possible TFs: ATF3                                                                                                                                                                                                                                                                                                  | 3.44481 |  |  | <a href="#">link</a> | <a href="#">link</a> | PWMs        |

| #   | Feature                                                                                                                                                                          | NES     | Logo                                                                                | Recovery Curve                                                                       | Candidate targets    | All regions in top 20000 | Database |
|-----|----------------------------------------------------------------------------------------------------------------------------------------------------------------------------------|---------|-------------------------------------------------------------------------------------|--------------------------------------------------------------------------------------|----------------------|--------------------------|----------|
| 231 | <input type="checkbox"/> transfac_pro__M05301<br>Description: V\$CPBP_01: CPBP<br>Possible TFs: KLF6                                                                             | 3.44368 | 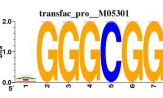   |    | <a href="#">link</a> | <a href="#">link</a>     | PWMs     |
| 232 | <input type="checkbox"/> jaspar__MA0975.1<br>Description: CRF2                                                                                                                   | 3.44323 |    |    | <a href="#">link</a> | <a href="#">link</a>     | PWMs     |
| 233 | <input type="checkbox"/> homer__AGCCAATCGG_NFY<br>Description: NFY(CCAAT)/Promoter/Homer                                                                                         | 3.44058 |    |    | <a href="#">link</a> | <a href="#">link</a>     | PWMs     |
| 234 | <input type="checkbox"/> jaspar__MA0283.1<br>Description: CHA4                                                                                                                   | 3.44030 |    |    | <a href="#">link</a> | <a href="#">link</a>     | PWMs     |
| 235 | <input type="checkbox"/> transfac_pro__M01916<br>Description: F\$CHA4_02: Cha4p                                                                                                  | 3.44012 |    |    | <a href="#">link</a> | <a href="#">link</a>     | PWMs     |
| 236 | <input type="checkbox"/> cisbp__M2088<br>Description: CHA4[gene ID: "YLR098C" species: "Saccharomyces cerevisiae" TF status: "direct" TF family: "Zinc cluster" DBDs: "Zn_clus"] | 3.43551 |    |   | <a href="#">link</a> | <a href="#">link</a>     | PWMs     |
| 237 | <input type="checkbox"/> dbcorrdB__EZH2__ENCSR000ARK_1__m4<br>Description: EZH2 (ENCSR000ARK-1, motif 4)<br>Possible TFs: EZH2                                                   | 3.43409 |  |  | <a href="#">link</a> | <a href="#">link</a>     | PWMs     |
| 238 | <input type="checkbox"/> hocomoco__NRF1_HUMAN.H11MO.0.A<br>Description: NRF1_HUMAN<br>Possible TFs: NRF1                                                                         | 3.43391 |  |  | <a href="#">link</a> | <a href="#">link</a>     | PWMs     |
| 239 | <input type="checkbox"/> dbcorrdB__KDM5B__ENCSR000AQA_1__m2<br>Description: KDM5B (ENCSR000AQA-1, motif 2)<br>Possible TFs: KDM5B                                                | 3.43176 |  |  | <a href="#">link</a> | <a href="#">link</a>     | PWMs     |
| 240 | <input type="checkbox"/> transfac_pro__M05391<br>Description: V\$LKLF_01: LKLF<br>Possible TFs: KLF2                                                                             | 3.43067 |  |  | <a href="#">link</a> | <a href="#">link</a>     | PWMs     |
| 241 | <input type="checkbox"/> cisbp__M0673<br>Description: M0673                                                                                                                      | 3.42995 |  |  | <a href="#">link</a> | <a href="#">link</a>     | PWMs     |
| 242 | <input type="checkbox"/> swissregulon__hs__NRF1.p2<br>Description: hs__NRF1.p2<br>Possible TFs: NRF1                                                                             | 3.42801 |  |  | <a href="#">link</a> | <a href="#">link</a>     | PWMs     |
| 243 | <input type="checkbox"/> transfac_pro__M05444<br>Description: V\$CPBP_02: CPBP<br>Possible TFs: KLF6                                                                             | 3.42722 |  |  | <a href="#">link</a> | <a href="#">link</a>     | PWMs     |



| #   | Feature                                                                                                                           | NES     | Logo                                                                                | Recovery Curve                                                                       | Candidate targets    | All regions in top 20000 | Database |
|-----|-----------------------------------------------------------------------------------------------------------------------------------|---------|-------------------------------------------------------------------------------------|--------------------------------------------------------------------------------------|----------------------|--------------------------|----------|
| 244 | <input type="checkbox"/> cisbp_M1544<br>Description: M1544                                                                        | 3.42128 |    |    | <a href="#">link</a> | <a href="#">link</a>     | PWMs     |
| 245 | <input type="checkbox"/> dbcorrdp_POLR2A_ENCSR000DMK-1_m1<br>Description: POLR2A (ENCSR000DMK-1, motif 1)<br>Possible TFs: POLR2A | 3.41589 |    |    | <a href="#">link</a> | <a href="#">link</a>     | PWMs     |
| 246 | <input type="checkbox"/> transfac_pro_M05029<br>Description: P\$CBF2_03: CBF2                                                     | 3.41543 |    |    | <a href="#">link</a> | <a href="#">link</a>     | PWMs     |
| 247 | <input type="checkbox"/> hocomoco_NFYB_HUMAN.H11MO.0.A<br>Description: NFYB_HUMAN<br>Possible TFs: NFYB                           | 3.41341 |    |    | <a href="#">link</a> | <a href="#">link</a>     | PWMs     |
| 248 | <input type="checkbox"/> swissregulon_sacCer_CST6<br>Description: sacCer_CST6                                                     | 3.41138 |    |    | <a href="#">link</a> | <a href="#">link</a>     | PWMs     |
| 249 | <input type="checkbox"/> dbcorrdp_POLR2A_ENCSR000BKI-1_m1<br>Description: POLR2A (ENCSR000BKI-1, motif 1)<br>Possible TFs: POLR2A | 3.41096 |    |   | <a href="#">link</a> | <a href="#">link</a>     | PWMs     |
| 250 | <input type="checkbox"/> transfac_pro_M05499<br>Description: V\$KLF_02: KLF<br>Possible TFs: KLF2                                 | 3.40630 |  |  | <a href="#">link</a> | <a href="#">link</a>     | PWMs     |
| 251 | <input type="checkbox"/> hocomoco_NRF1_MOUSE.H11MO.0.A<br>Description: NRF1_MOUSE<br>Possible TFs: NRF1                           | 3.40567 |  |  | <a href="#">link</a> | <a href="#">link</a>     | PWMs     |
| 252 | <input type="checkbox"/> dbcorrdp_NFYB_ENCSR000DNM-1_m1<br>Description: NFYB (ENCSR000DNM-1, motif 1)<br>Possible TFs: NFYB       | 3.40553 |  |  | <a href="#">link</a> | <a href="#">link</a>     | PWMs     |
| 253 | <input type="checkbox"/> factorbook_UA1<br>Description: UA1<br>Possible TFs: ZBTB33                                               | 3.40030 |  |  | <a href="#">link</a> | <a href="#">link</a>     | PWMs     |
| 254 | <input type="checkbox"/> cisbp_M0275<br>Description: M0275                                                                        | 3.39954 |  |  | <a href="#">link</a> | <a href="#">link</a>     | PWMs     |
| 255 | <input type="checkbox"/> transfac_pro_M05023<br>Description: P\$ERF110_02: ERF110                                                 | 3.39924 |  |  | <a href="#">link</a> | <a href="#">link</a>     | PWMs     |
| 256 | <input type="checkbox"/> elemento_CGCGCGC<br>Description: Conserved regulatory element CGCGCGC between Hs and Mm                  | 3.39734 |  |  | <a href="#">link</a> | <a href="#">link</a>     | PWMs     |

| #   |                          | Feature                                                                                                                                                                                                                                                                                                                                                                                                                            | NES     | Logo                                                                                | Recovery Curve                                                                       | Candidate targets    | All regions in top 20000 | Database    |
|-----|--------------------------|------------------------------------------------------------------------------------------------------------------------------------------------------------------------------------------------------------------------------------------------------------------------------------------------------------------------------------------------------------------------------------------------------------------------------------|---------|-------------------------------------------------------------------------------------|--------------------------------------------------------------------------------------|----------------------|--------------------------|-------------|
| 257 | <input type="checkbox"/> | hocomoco__HAND1_HUMAN.H11MO.1.D<br>Description: HAND1_HUMAN<br>Possible TFs: HAND1                                                                                                                                                                                                                                                                                                                                                 | 3.39442 |    |    | <a href="#">link</a> | <a href="#">link</a>     | PWMs        |
| 258 | <input type="checkbox"/> | jaspar__MA0527.1<br>Description: ZBTB33<br>Possible TFs: ZBTB33                                                                                                                                                                                                                                                                                                                                                                    | 3.39386 |    |    | <a href="#">link</a> | <a href="#">link</a>     | PWMs        |
| 259 | <input type="checkbox"/> | cisbp__M6371<br>Description: NFYA[gene ID: "ENSG00000001167" species: "Homo sapiens" TF status: "direct" TF family: "CBF/NF-Y" DBDs: "CBFB_NFYA"]; Nf-YA[gene ID: "FBgn0035993" species: "Drosophila melanogaster" TF status: "inferred" TF family: "CBF/NF-Y" DBDs: "CBFB_NFYA"]; Nfya[gene ID: "ENSMUSG00000023994" species: "Mus musculus" TF status: "inferred" TF family: "CBF/NF-Y" DBDs: "CBFB_NFYA"]<br>Possible TFs: NFYA | 3.39372 |    |    | <a href="#">link</a> | <a href="#">link</a>     | PWMs        |
| 260 | <input type="checkbox"/> | ENCF001SPD<br>Description: DNase-seq on human ishkawa treated with 4-hydroxy-tamoxifen at 100nM for 30 minutes                                                                                                                                                                                                                                                                                                                     | 3.39358 |                                                                                     |    | <a href="#">link</a> | <a href="#">link</a>     | DHS & FAIRE |
| 261 | <input type="checkbox"/> | transfac_public__M00017<br>Description: V\$ATF_Q1: ATF                                                                                                                                                                                                                                                                                                                                                                             | 3.39157 |    |    | <a href="#">link</a> | <a href="#">link</a>     | PWMs        |
| 262 | <input type="checkbox"/> | ENCF001SOP<br>Description: Duke human GM18507 DNase-seq                                                                                                                                                                                                                                                                                                                                                                            | 3.38529 |                                                                                     |  | <a href="#">link</a> | <a href="#">link</a>     | DHS & FAIRE |
| 263 | <input type="checkbox"/> | cisbp__M3083<br>Description: CREB1[gene ID: "ENSG00000118260" species: "Homo sapiens" TF status: "direct" TF family: "bZIP" DBDs: "bZIP_1"]; CrebB-17A[gene ID: "FBgn0014467" species: "Drosophila melanogaster" TF status: "inferred" TF family: "bZIP" DBDs: "bZIP_1"]<br>Possible TFs: CREB1                                                                                                                                    | 3.38217 |  |  | <a href="#">link</a> | <a href="#">link</a>     | PWMs        |
| 264 | <input type="checkbox"/> | jaspar__MA0320.1<br>Description: IME1                                                                                                                                                                                                                                                                                                                                                                                              | 3.38131 |  |  | <a href="#">link</a> | <a href="#">link</a>     | PWMs        |
| 265 | <input type="checkbox"/> | flyfactorsurvey__CG3065_F1-3_SOLEXA_2.5_FBgn0034946<br>Description: CG3065_F1-3_SOLEXA_2.5_FBgn0034946<br>Possible TFs: KLF18, KLF17                                                                                                                                                                                                                                                                                               | 3.37966 |  |  | <a href="#">link</a> | <a href="#">link</a>     | PWMs        |
| 266 | <input type="checkbox"/> | elemento__CGCGGGA<br>Description: Conserved regulatory element CGCGGGA between Hs and Mm                                                                                                                                                                                                                                                                                                                                           | 3.37930 |  |  | <a href="#">link</a> | <a href="#">link</a>     | PWMs        |
| 267 | <input type="checkbox"/> | dbcorrd__POLR2A__ENCSR000EAR_1_m1<br>Description: POLR2A (ENCSR000EAR-1, motif 1)<br>Possible TFs: POLR2A                                                                                                                                                                                                                                                                                                                          | 3.37808 |  |  | <a href="#">link</a> | <a href="#">link</a>     | PWMs        |
| 268 | <input type="checkbox"/> | cisbp__M0029<br>Description: M0029                                                                                                                                                                                                                                                                                                                                                                                                 | 3.37527 |  |  | <a href="#">link</a> | <a href="#">link</a>     | PWMs        |

| #   | Feature                                                                                                                                                                                      | NES     | Logo | Recovery Curve | Candidate targets    | All regions in top 20000 | Database    |
|-----|----------------------------------------------------------------------------------------------------------------------------------------------------------------------------------------------|---------|------|----------------|----------------------|--------------------------|-------------|
| 269 | <input type="checkbox"/> dbcorrd_b__CHD2__ENCSR000EBT_1__m2<br>Description: CHD2 (ENCSR000EBT-1, motif 2)<br>Possible TFs: CHD2                                                              | 3.37365 |      |                | <a href="#">link</a> | <a href="#">link</a>     | PWMs        |
| 270 | <input type="checkbox"/> transfac_pro__M09580<br>Description: P\$TGA6_03: TGA6                                                                                                               | 3.37081 |      |                | <a href="#">link</a> | <a href="#">link</a>     | PWMs        |
| 271 | <input type="checkbox"/> transfac_pro__M01186<br>Description: P\$STF1_01: STF1                                                                                                               | 3.36794 |      |                | <a href="#">link</a> | <a href="#">link</a>     | PWMs        |
| 272 | <input type="checkbox"/> dbcorrd_b__RBBP5__ENCSR000AQC_1__m5<br>Description: RBBP5 (ENCSR000AQC-1, motif 5)<br>Possible TFs: RBBP5                                                           | 3.36727 |      |                | <a href="#">link</a> | <a href="#">link</a>     | PWMs        |
| 273 | <input type="checkbox"/> dbcorrd_b__ESRRA__ENCSR000DYQ_1__m5<br>Description: ESRRA (ENCSR000DYQ-1, motif 5)<br>Possible TFs: ESRRA                                                           | 3.36715 |      |                | <a href="#">link</a> | <a href="#">link</a>     | PWMs        |
| 274 | <input type="checkbox"/> transfac_pro__M09066<br>Description: P\$ERF105_03: ERF105                                                                                                           | 3.36713 |      |                | <a href="#">link</a> | <a href="#">link</a>     | PWMs        |
| 275 | <input type="checkbox"/> transfac_pro__M05386<br>Description: V\$KLF17_01: KLF17<br>Possible TFs: KLF17                                                                                      | 3.36639 |      |                | <a href="#">link</a> | <a href="#">link</a>     | PWMs        |
| 276 | <input type="checkbox"/> hdp1__NAP1L1<br>Description: NAP1L1<br>Possible TFs: NAP1L1                                                                                                         | 3.36401 |      |                | <a href="#">link</a> | <a href="#">link</a>     | PWMs        |
| 277 | <input type="checkbox"/> transfac_pro__M01742<br>Description: V\$ZFP206_01: Zfp206<br>Possible TFs: ZSCAN10                                                                                  | 3.36065 |      |                | <a href="#">link</a> | <a href="#">link</a>     | PWMs        |
| 278 | <input type="checkbox"/> ENCF001SPK<br>Description: DNase-seq on human PanIsletD                                                                                                             | 3.35994 |      |                | <a href="#">link</a> | <a href="#">link</a>     | DHS & FAIRE |
| 279 | <input type="checkbox"/> ENCF001SQD<br>Description: DNase-seq on human CD20+ (R001778)                                                                                                       | 3.35976 |      |                | <a href="#">link</a> | <a href="#">link</a>     | DHS & FAIRE |
| 280 | <input type="checkbox"/> cisbp__M2125<br>Description: IME1[ <i>gene ID: "YJR094C"</i> species: " <i>Saccharomyces cerevisiae</i> " TF status: "direct" TF family: "Unknown" DBDs: "UNKNOWN"] | 3.35827 |      |                | <a href="#">link</a> | <a href="#">link</a>     | PWMs        |
| 281 | <input type="checkbox"/> ENCF001WEQ<br>Description: DNase-seq on human CD20+ (R001778)                                                                                                       | 3.35678 |      |                | <a href="#">link</a> | <a href="#">link</a>     | DHS & FAIRE |

| #   | Feature                                                                                                                                                                                                | NES     | Logo | Recovery Curve | Candidate targets    | All regions in top 20000 | Database |
|-----|--------------------------------------------------------------------------------------------------------------------------------------------------------------------------------------------------------|---------|------|----------------|----------------------|--------------------------|----------|
| 282 | <input type="checkbox"/> dbcorrd__NFYA__ENCSR000DNN_1__m1<br>Description: NFYA (ENCSR000DNN-1, motif 1)<br>Possible TFs: NFYA                                                                          | 3.35656 |      |                | <a href="#">link</a> | <a href="#">link</a>     | PWMs     |
| 283 | <input type="checkbox"/> transfac_pro__M05105<br>Description: P\$AT1G68550_01: At1g68550                                                                                                               | 3.35616 |      |                | <a href="#">link</a> | <a href="#">link</a>     | PWMs     |
| 284 | <input type="checkbox"/> transfac_pro__M05134<br>Description: P\$AT3G61630_01: At3g61630                                                                                                               | 3.35515 |      |                | <a href="#">link</a> | <a href="#">link</a>     | PWMs     |
| 285 | <input type="checkbox"/> dbcorrd__SP1__ENCSR000BIR_1__m1<br>Description: SP1 (ENCSR000BIR-1, motif 1)<br>Possible TFs: SP1                                                                             | 3.35360 |      |                | <a href="#">link</a> | <a href="#">link</a>     | PWMs     |
| 286 | <input type="checkbox"/> hocomoco__ATF1_HUMAN.H11MO.0.B<br>Description: ATF1_HUMAN<br>Possible TFs: ATF1                                                                                               | 3.35256 |      |                | <a href="#">link</a> | <a href="#">link</a>     | PWMs     |
| 287 | <input type="checkbox"/> yetfasco__YDR303C_580<br>Description: YDR303C_580                                                                                                                             | 3.35020 |      |                | <a href="#">link</a> | <a href="#">link</a>     | PWMs     |
| 288 | <input type="checkbox"/> transfac_pro__M05407<br>Description: V\$KLF17_02: Klf17<br>Possible TFs: KLF17                                                                                                | 3.34528 |      |                | <a href="#">link</a> | <a href="#">link</a>     | PWMs     |
| 289 | <input type="checkbox"/> transfac_pro__M01934<br>Description: F\$RSC3_02: Rsc3p                                                                                                                        | 3.34379 |      |                | <a href="#">link</a> | <a href="#">link</a>     | PWMs     |
| 290 | <input type="checkbox"/> cisbp__M4783<br>Description: Bteb2[gene ID: "FBgn0025679" species: "Drosophila melanogaster" TF status: "direct" TF family: "C2H2 ZF" DBDs: "zf-C2H2"]<br>Possible TFs: KLF15 | 3.34192 |      |                | <a href="#">link</a> | <a href="#">link</a>     | PWMs     |
| 291 | <input type="checkbox"/> jaspar__MA0374.1<br>Description: RSC3                                                                                                                                         | 3.34074 |      |                | <a href="#">link</a> | <a href="#">link</a>     | PWMs     |
| 292 | <input type="checkbox"/> jaspar__MA0980.1<br>Description: RAP2-10                                                                                                                                      | 3.33918 |      |                | <a href="#">link</a> | <a href="#">link</a>     | PWMs     |
| 293 | <input type="checkbox"/> swissregulon__hs__NFY_A_B_C_.p2<br>Description: hs__NFY{A,B,C}.p2<br>Possible TFs: NFYC, NFYB, NFYA                                                                           | 3.33350 |      |                | <a href="#">link</a> | <a href="#">link</a>     | PWMs     |
| 294 | <input type="checkbox"/> cisbp__M1789<br>Description: RSC30[gene ID: "YHR056C" species: "Saccharomyces cerevisiae" TF status: "direct" TF family: "Zinc cluster" DBDs: "Zn_clus"]                      | 3.33308 |      |                | <a href="#">link</a> | <a href="#">link</a>     | PWMs     |

| #   |                          | Feature                                                                                                                                                                                                                                                                                                                                                                                                                                                                                                                                                                                                                                                                                                                                                                                                                                                                                                                                                                                                                                                                                                                                                                                                                                                                                                                                                                                                                                                                                                                                                                                                     | NES     | Logo | Recovery Curve | Candidate targets    | All regions in top 20000 | Database |
|-----|--------------------------|-------------------------------------------------------------------------------------------------------------------------------------------------------------------------------------------------------------------------------------------------------------------------------------------------------------------------------------------------------------------------------------------------------------------------------------------------------------------------------------------------------------------------------------------------------------------------------------------------------------------------------------------------------------------------------------------------------------------------------------------------------------------------------------------------------------------------------------------------------------------------------------------------------------------------------------------------------------------------------------------------------------------------------------------------------------------------------------------------------------------------------------------------------------------------------------------------------------------------------------------------------------------------------------------------------------------------------------------------------------------------------------------------------------------------------------------------------------------------------------------------------------------------------------------------------------------------------------------------------------|---------|------|----------------|----------------------|--------------------------|----------|
| 295 | <input type="checkbox"/> | dbcorrdB__SIN3A__ENCSR000BGL-1__m1<br>Description: SIN3A (ENCSR000BGL-1, motif 1)<br>Possible TFs: SIN3A                                                                                                                                                                                                                                                                                                                                                                                                                                                                                                                                                                                                                                                                                                                                                                                                                                                                                                                                                                                                                                                                                                                                                                                                                                                                                                                                                                                                                                                                                                    | 3.33306 |      |                | <a href="#">link</a> | <a href="#">link</a>     | PWMs     |
| 296 | <input type="checkbox"/> | cisbp__M0392<br>Description: SP5[ <i>gene ID: "ENSG00000204335" species: "Homo sapiens" TF status: "inferred" TF family: "C2H2 ZF" DBDs: "zf-C2H2";</i> SP6[ <i>gene ID: "ENSG00000189120" species: "Homo sapiens" TF status: "inferred" TF family: "C2H2 ZF" DBDs: "zf-C2H2";</i> SP7[ <i>gene ID: "ENSG00000170374" species: "Homo sapiens" TF status: "inferred" TF family: "C2H2 ZF" DBDs: "zf-C2H2";</i> SP9[ <i>gene ID: "ENSG00000217236" species: "Homo sapiens" TF status: "inferred" TF family: "C2H2 ZF" DBDs: "zf-C2H2";</i> Sp1[ <i>gene ID: "ENSMUSG00000001280" species: "Mus musculus" TF status: "direct" TF family: "C2H2 ZF" DBDs: "zf-C2H2";</i> Sp2[ <i>gene ID: "ENSMUSG00000018678" species: "Mus musculus" TF status: "inferred" TF family: "C2H2 ZF" DBDs: "zf-C2H2";</i> Sp3[ <i>gene ID: "ENSMUSG00000027109" species: "Mus musculus" TF status: "inferred" TF family: "C2H2 ZF" DBDs: "zf-C2H2";</i> Sp5[ <i>gene ID: "ENSMUSG00000075304" species: "Mus musculus" TF status: "inferred" TF family: "C2H2 ZF" DBDs: "zf-C2H2";</i> Sp6[ <i>gene ID: "ENSMUSG00000038560" species: "Mus musculus" TF status: "inferred" TF family: "C2H2 ZF" DBDs: "zf-C2H2";</i> Sp7[ <i>gene ID: "ENSMUSG00000060284" species: "Mus musculus" TF status: "inferred" TF family: "C2H2 ZF" DBDs: "zf-C2H2";</i> Sp8[ <i>gene ID: "ENSMUSG00000048562" species: "Mus musculus" TF status: "inferred" TF family: "C2H2 ZF" DBDs: "zf-C2H2";</i> Sp9[ <i>gene ID: "ENSMUSG00000068859" species: "Mus musculus" TF status: "inferred" TF family: "C2H2 ZF" DBDs: "zf-C2H2";</i><br>Possible TFs: SP1 | 3.33305 |      |                | <a href="#">link</a> | <a href="#">link</a>     | PWMs     |
| 297 | <input type="checkbox"/> | transfac_pro__M04969<br>Description: P\$ABI4_03: ABI4                                                                                                                                                                                                                                                                                                                                                                                                                                                                                                                                                                                                                                                                                                                                                                                                                                                                                                                                                                                                                                                                                                                                                                                                                                                                                                                                                                                                                                                                                                                                                       | 3.33049 |      |                | <a href="#">link</a> | <a href="#">link</a>     | PWMs     |
| 298 | <input type="checkbox"/> | transfac_pro__M05096<br>Description: P\$ATERF9_01: ATERF9                                                                                                                                                                                                                                                                                                                                                                                                                                                                                                                                                                                                                                                                                                                                                                                                                                                                                                                                                                                                                                                                                                                                                                                                                                                                                                                                                                                                                                                                                                                                                   | 3.32843 |      |                | <a href="#">link</a> | <a href="#">link</a>     | PWMs     |
| 299 | <input type="checkbox"/> | dbcorrdB__HCFC1__ENCSR000ECH-1__m3<br>Description: HCFC1 (ENCSR000ECH-1, motif 3)<br>Possible TFs: HCFC1                                                                                                                                                                                                                                                                                                                                                                                                                                                                                                                                                                                                                                                                                                                                                                                                                                                                                                                                                                                                                                                                                                                                                                                                                                                                                                                                                                                                                                                                                                    | 3.32801 |      |                | <a href="#">link</a> | <a href="#">link</a>     | PWMs     |
| 300 | <input type="checkbox"/> | transfac_pro__M04760<br>Description: V\$NR3C1_06: GR<br>Possible TFs: NR3C1                                                                                                                                                                                                                                                                                                                                                                                                                                                                                                                                                                                                                                                                                                                                                                                                                                                                                                                                                                                                                                                                                                                                                                                                                                                                                                                                                                                                                                                                                                                                 | 3.32670 |      |                | <a href="#">link</a> | <a href="#">link</a>     | PWMs     |
| 301 | <input type="checkbox"/> | cisbp__M6372<br>Description: NFYB[ <i>gene ID: "ENSG00000120837" species: "Homo sapiens" TF status: "direct" TF family: "Unknown" DBDs: "UNKNOWN";</i><br>Possible TFs: NFYB                                                                                                                                                                                                                                                                                                                                                                                                                                                                                                                                                                                                                                                                                                                                                                                                                                                                                                                                                                                                                                                                                                                                                                                                                                                                                                                                                                                                                                | 3.32637 |      |                | <a href="#">link</a> | <a href="#">link</a>     | PWMs     |
| 302 | <input type="checkbox"/> | cisbp__M1545<br>Description: GMEB1[ <i>gene ID: "ENSG00000162419" species: "Homo sapiens" TF status: "direct" TF family: "SAND" DBDs: "SAND";</i><br>Possible TFs: GMEB1                                                                                                                                                                                                                                                                                                                                                                                                                                                                                                                                                                                                                                                                                                                                                                                                                                                                                                                                                                                                                                                                                                                                                                                                                                                                                                                                                                                                                                    | 3.32505 |      |                | <a href="#">link</a> | <a href="#">link</a>     | PWMs     |



| #   | Feature                                                                                                                                  | NES     | Logo | Recovery Curve | Candidate targets    | All regions in top 20000 | Database    |
|-----|------------------------------------------------------------------------------------------------------------------------------------------|---------|------|----------------|----------------------|--------------------------|-------------|
| 303 | <input type="checkbox"/> hocomoco__SP3_HUMAN.H11MO.0.B<br>Description: SP3_HUMAN<br>Possible TFs: SP3                                    | 3.32052 |      |                | <a href="#">link</a> | <a href="#">link</a>     | PWMs        |
| 304 | <input type="checkbox"/> dbcorrd__CHD2__ENCSR000DZR_1__m1<br>Description: CHD2 (ENCSR000DZR-1, motif 1)<br>Possible TFs: CHD2            | 3.31995 |      |                | <a href="#">link</a> | <a href="#">link</a>     | PWMs        |
| 305 | <input type="checkbox"/> dbcorrd__NELFE__ENCSR000DOF_1__m6<br>Description: NELFE (ENCSR000DOF-1, motif 6)<br>Possible TFs: NELFE         | 3.31816 |      |                | <a href="#">link</a> | <a href="#">link</a>     | PWMs        |
| 306 | <input type="checkbox"/> ENCF001SPC<br>Description: DNase-seq on human ishikawa treated with estradiol at 10nM for 30 minutes            | 3.31478 |      |                | <a href="#">link</a> | <a href="#">link</a>     | DHS & FAIRE |
| 307 | <input type="checkbox"/> cisbp__M0025<br>Description: M0025                                                                              | 3.31474 |      |                | <a href="#">link</a> | <a href="#">link</a>     | PWMs        |
| 308 | <input type="checkbox"/> hdpi__AKR1A1<br>Description: AKR1A1<br>Possible TFs: AKR1A1                                                     | 3.31365 |      |                | <a href="#">link</a> | <a href="#">link</a>     | PWMs        |
| 309 | <input type="checkbox"/> taipale_cyt_meth__KLF13_NRCCACGCCCMYN_eDBD<br>Description: KLF13 [Znf_C2H2]<br>Possible TFs: KLF13              | 3.31331 |      |                | <a href="#">link</a> | <a href="#">link</a>     | PWMs        |
| 310 | <input type="checkbox"/> dbcorrd__GABPA__ENCSR000BGC_1__m1<br>Description: GABPA (ENCSR000BGC-1, motif 1)<br>Possible TFs: GABPA         | 3.31277 |      |                | <a href="#">link</a> | <a href="#">link</a>     | PWMs        |
| 311 | <input type="checkbox"/> dbcorrd__SMARCA4__ENCSR000EYC_1__m10<br>Description: SMARCA4 (ENCSR000EYC-1, motif 10)<br>Possible TFs: SMARCA4 | 3.31067 |      |                | <a href="#">link</a> | <a href="#">link</a>     | PWMs        |
| 312 | <input type="checkbox"/> transfac_pro__M02773<br>Description: V\$KLF7_Q3: Klf7<br>Possible TFs: KLF7                                     | 3.31061 |      |                | <a href="#">link</a> | <a href="#">link</a>     | PWMs        |
| 313 | <input type="checkbox"/> transfac_pro__M05145<br>Description: P\$DREB2D_Q1: DREB 2D                                                      | 3.31028 |      |                | <a href="#">link</a> | <a href="#">link</a>     | PWMs        |
| 314 | <input type="checkbox"/> ENCF001SSJ<br>Description: DNase-seq on human Th2                                                               | 3.30585 |      |                | <a href="#">link</a> | <a href="#">link</a>     | DHS & FAIRE |
| 315 | <input type="checkbox"/> transfac_pro__M07052<br>Description: V\$NRF1_Q5: NRF-1<br>Possible TFs: NRF1                                    | 3.30536 |      |                | <a href="#">link</a> | <a href="#">link</a>     | PWMs        |

| #   | Feature                                                                                                                                                          | NES     | Logo | Recovery Curve | Candidate targets    | All regions in top 20000 | Database    |
|-----|------------------------------------------------------------------------------------------------------------------------------------------------------------------|---------|------|----------------|----------------------|--------------------------|-------------|
| 316 | <input type="checkbox"/> dbcorrd__POLR2A__ENCSR000BQB_1__m1<br>Description: POLR2A (ENCSR000BQB-1, motif 1)<br>Possible TFs: POLR2A                              | 3.30343 |      |                | <a href="#">link</a> | <a href="#">link</a>     | PWMs        |
| 317 | <input type="checkbox"/> ENCF001WTO<br>Description: DNase-seq on human Th2                                                                                       | 3.30006 |      |                | <a href="#">link</a> | <a href="#">link</a>     | DHS & FAIRE |
| 318 | <input type="checkbox"/> scerf__badis.RSC3<br>Description: badis.RSC3                                                                                            | 3.29473 |      |                | <a href="#">link</a> | <a href="#">link</a>     | PWMs        |
| 319 | <input type="checkbox"/> transfac_pro__M00370<br>Description: P\$CPRF3_Q2: CPRF-3                                                                                | 3.29381 |      |                | <a href="#">link</a> | <a href="#">link</a>     | PWMs        |
| 320 | <input type="checkbox"/> dbcorrd__ZBTB33__ENCSR000BHC_1__m1<br>Description: ZBTB33 (ENCSR000BHC-1, motif 1)<br>Possible TFs: ZBTB33                              | 3.29200 |      |                | <a href="#">link</a> | <a href="#">link</a>     | PWMs        |
| 321 | <input type="checkbox"/> transfac_pro__M04694<br>Description: V\$NRF1_Q3: NRF-1<br>Possible TFs: NRF1                                                            | 3.28469 |      |                | <a href="#">link</a> | <a href="#">link</a>     | PWMs        |
| 322 | <input type="checkbox"/> predrem__nrMotif1056<br>Description: 151_fLung_R-DS16566.M380                                                                           | 3.28369 |      |                | <a href="#">link</a> | <a href="#">link</a>     | PWMs        |
| 323 | <input type="checkbox"/> cisbp__M6197<br>Description: E4F1[<br>"Homo sapiens" TF status: "direct" TF family: "C2H2 ZF"<br>DBDs: "zf-C2H2"]<br>Possible TFs: E4F1 | 3.27999 |      |                | <a href="#">link</a> | <a href="#">link</a>     | PWMs        |
| 324 | <input type="checkbox"/> transfac_pro__M05069<br>Description: P\$ATERF12_Q1: ATERF12                                                                             | 3.27738 |      |                | <a href="#">link</a> | <a href="#">link</a>     | PWMs        |
| 325 | <input type="checkbox"/> predrem__nrMotif2242<br>Description: 234_fStomach-DS17172.M267                                                                          | 3.27605 |      |                | <a href="#">link</a> | <a href="#">link</a>     | PWMs        |
| 326 | <input type="checkbox"/> elemento__CCGCCTC<br>Description: Conserved regulatory element CCGCCTC between Hs and Mm                                                | 3.27531 |      |                | <a href="#">link</a> | <a href="#">link</a>     | PWMs        |
| 327 | <input type="checkbox"/> E093-DNase.hotspot.all.peaks-narrowpeak<br>Description: DNase in Fetal Thymus (E093, narrowpeak, hotspot)                               | 3.27211 |      |                | <a href="#">link</a> | <a href="#">link</a>     | DHS & FAIRE |
| 328 | <input type="checkbox"/> jasper__MA0096.1<br>Description: bZIP910                                                                                                | 3.27130 |      |                | <a href="#">link</a> | <a href="#">link</a>     | PWMs        |

| #   | Feature                                                                                                                             | NES     | Logo | Recovery Curve | Candidate targets    | All regions in top 20000 |             |
|-----|-------------------------------------------------------------------------------------------------------------------------------------|---------|------|----------------|----------------------|--------------------------|-------------|
|     |                                                                                                                                     |         |      |                |                      | Database                 |             |
| 329 | <input type="checkbox"/> dbcorrd__POLR2A__ENCSR000DLQ_1__m2<br>Description: POLR2A (ENCSR000DLQ-1, motif 2)<br>Possible TFs: POLR2A | 3.27055 |      |                | <a href="#">link</a> | <a href="#">link</a>     | PWMs        |
| 330 | <input type="checkbox"/> ENCF001WIV<br>Description: DNase-seq on human HepG2                                                        | 3.27023 |      |                | <a href="#">link</a> | <a href="#">link</a>     | DHS & FAIRE |
| 331 | <input type="checkbox"/> transfac_pro__M05094<br>Description: P\$AT1G24590_01: At1g24590                                            | 3.26453 |      |                | <a href="#">link</a> | <a href="#">link</a>     | PWMs        |
| 332 | <input type="checkbox"/> elemento__CGCGTGAC<br>Description: Conserved regulatory element CGCGTGAC between Hs and Mm                 | 3.26350 |      |                | <a href="#">link</a> | <a href="#">link</a>     | PWMs        |
| 333 | <input type="checkbox"/> taipale_cyt_meth__XBP1_NRTGACGTCAYN_FL<br>Description: XBP1 [bZIP]<br>Possible TFs: XBP1                   | 3.26280 |      |                | <a href="#">link</a> | <a href="#">link</a>     | PWMs        |
| 334 | <input type="checkbox"/> transfac_pro__M05893<br>Description: V\$ZNF676_04: ZNF676<br>Possible TFs: ZNF676                          | 3.26249 |      |                | <a href="#">link</a> | <a href="#">link</a>     | PWMs        |
| 335 | <input type="checkbox"/> cisbp__M1920<br>Description: M1920                                                                         | 3.25963 |      |                | <a href="#">link</a> | <a href="#">link</a>     | PWMs        |
| 336 | <input type="checkbox"/> ENCF001SPR<br>Description: DNase-seq on human adult CD4 Th0                                                | 3.25948 |      |                | <a href="#">link</a> | <a href="#">link</a>     | DHS & FAIRE |
| 337 | <input type="checkbox"/> transfac_pro__M07449<br>Description: F\$FL_01: FL                                                          | 3.25822 |      |                | <a href="#">link</a> | <a href="#">link</a>     | PWMs        |
| 338 | <input type="checkbox"/> E092-DNase.hotspot.all.peaks-narrowpeak<br>Description: DNase in Fetal Stomach (E092, narrowpeak, hotspot) | 3.25615 |      |                | <a href="#">link</a> | <a href="#">link</a>     | DHS & FAIRE |
| 339 | <input type="checkbox"/> dbcorrd__POLR2A__ENCSR000DLJ_1__m1<br>Description: POLR2A (ENCSR000DLJ-1, motif 1)<br>Possible TFs: POLR2A | 3.25592 |      |                | <a href="#">link</a> | <a href="#">link</a>     | PWMs        |
| 340 | <input type="checkbox"/> cisbp__M1383<br>Description: M1383                                                                         | 3.25551 |      |                | <a href="#">link</a> | <a href="#">link</a>     | PWMs        |
| 341 | <input type="checkbox"/> transfac_pro__M09033<br>Description: P\$AT4G18450_01: AT4G18450                                            | 3.25543 |      |                | <a href="#">link</a> | <a href="#">link</a>     | PWMs        |

| #   | Feature                                                             | NES     | Logo                                                                                | Recovery Curve                                                                       | Candidate targets    | All regions in top 20000 | Database |
|-----|---------------------------------------------------------------------|---------|-------------------------------------------------------------------------------------|--------------------------------------------------------------------------------------|----------------------|--------------------------|----------|
|     | <input type="checkbox"/> elemento__CGCGAGA                          |         |                                                                                     |                                                                                      |                      |                          |          |
| 342 | Description: Conserved regulatory element CGCGAGA between Hs and Mm | 3.25473 | 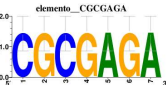   |    | <a href="#">link</a> | <a href="#">link</a>     | PWMs     |
|     | <input type="checkbox"/> transfac_pro__M05035                       |         |                                                                                     |                                                                                      |                      |                          |          |
| 343 | Description: P\$TSRF1_01: TSRF1                                     | 3.25336 |    |    | <a href="#">link</a> | <a href="#">link</a>     | PWMs     |
|     | <input type="checkbox"/> jaspar__MA1051.1                           |         |                                                                                     |                                                                                      |                      |                          |          |
| 344 | Description: RAP2-3                                                 | 3.24970 |    |    | <a href="#">link</a> | <a href="#">link</a>     | PWMs     |
|     | <input type="checkbox"/> jaspar__MA1069.1                           |         |                                                                                     |                                                                                      |                      |                          |          |
| 345 | Description: TGA6                                                   | 3.24596 |    |    | <a href="#">link</a> | <a href="#">link</a>     | PWMs     |
|     | <input type="checkbox"/> cisbp__M1280                               |         |                                                                                     |                                                                                      |                      |                          |          |
| 346 | Description: M1280                                                  | 3.24502 |    |    | <a href="#">link</a> | <a href="#">link</a>     | PWMs     |
|     | <input type="checkbox"/> dbcorrdb__ATF3__ENCSR000BKE_1__m1          |         |                                                                                     |                                                                                      |                      |                          |          |
| 347 | Description: ATF3 (ENCSR000BKE-1, motif 1)<br>Possible TFs: ATF3    | 3.24428 |    |    | <a href="#">link</a> | <a href="#">link</a>     | PWMs     |
|     | <input type="checkbox"/> transfac_pro__M04975                       |         |                                                                                     |                                                                                      |                      |                          |          |
| 348 | Description: P\$ERF3_01: ERF3                                       | 3.24346 |  |  | <a href="#">link</a> | <a href="#">link</a>     | PWMs     |
|     | <input type="checkbox"/> transfac_pro__M01783                       |         |                                                                                     |                                                                                      |                      |                          |          |
| 349 | Description: V\$SP2_01: SP2<br>Possible TFs: SP2                    | 3.24092 |  |  | <a href="#">link</a> | <a href="#">link</a>     | PWMs     |

34/49



| #   |                          | Feature                                                                                                                                                                                                                                                                                            | NES     | Logo                                                                                | Recovery Curve                                                                       | Candidate targets    | All regions in top 20000 | Database |
|-----|--------------------------|----------------------------------------------------------------------------------------------------------------------------------------------------------------------------------------------------------------------------------------------------------------------------------------------------|---------|-------------------------------------------------------------------------------------|--------------------------------------------------------------------------------------|----------------------|--------------------------|----------|
| 358 | <input type="checkbox"/> | transfac_pro__M04710<br>Description: V\$CHD2_01: CHD2<br>Possible TFs: CHD2                                                                                                                                                                                                                        | 3.22947 | 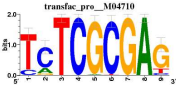   |    | <a href="#">link</a> | <a href="#">link</a>     | PWMs     |
| 359 | <input type="checkbox"/> | swissregulon__sacCer__CAT8<br>Description: sacCer__CAT8                                                                                                                                                                                                                                            | 3.22548 |    |    | <a href="#">link</a> | <a href="#">link</a>     | PWMs     |
| 360 | <input type="checkbox"/> | taipale_cyt_meth__CREB1_NRTGAYGTN_eDBD_meth<br>Description: CREB1 [bZIP, CpG-meth]<br>Possible TFs: CREB1                                                                                                                                                                                          | 3.22426 |    |    | <a href="#">link</a> | <a href="#">link</a>     | PWMs     |
| 361 | <input type="checkbox"/> | cisbp__M1543<br>Description: M1543                                                                                                                                                                                                                                                                 | 3.22277 |    |    | <a href="#">link</a> | <a href="#">link</a>     | PWMs     |
| 362 | <input type="checkbox"/> | hocomoco__E4F1_HUMAN.H11MO.0.D<br>Description: E4F1_HUMAN<br>Possible TFs: E4F1                                                                                                                                                                                                                    | 3.21903 |    |    | <a href="#">link</a> | <a href="#">link</a>     | PWMs     |
| 363 | <input type="checkbox"/> | swissregulon__hs__ATF4.p2<br>Description: hs__ATF4.p2<br>Possible TFs: ATF4                                                                                                                                                                                                                        | 3.21847 |    |    | <a href="#">link</a> | <a href="#">link</a>     | PWMs     |
| 364 | <input type="checkbox"/> | dbcorrd__PHF8_ENC SR000AQH_1__m1<br>Description: PHF8 (ENC SR000AQH-1, motif 1)<br>Possible TFs: PHF8                                                                                                                                                                                              | 3.21429 |  |  | <a href="#">link</a> | <a href="#">link</a>     | PWMs     |
| 365 | <input type="checkbox"/> | transfac_pro__M09077<br>Description: P\$ERF6_03: ERF6                                                                                                                                                                                                                                              | 3.21129 |  |  | <a href="#">link</a> | <a href="#">link</a>     | PWMs     |
| 366 | <input type="checkbox"/> | taipale_cyt_meth__ZNF454_TRGCGCCGCGGCYN_eDBD_meth<br>Description: ZNF454 [KRAB_Znf_C2H2, CpG-meth]<br>Possible TFs: ZNF454                                                                                                                                                                         | 3.21077 |  |  | <a href="#">link</a> | <a href="#">link</a>     | PWMs     |
| 367 | <input type="checkbox"/> | dbcorrd__POLR2A_ENC SR000FAW_1__m1<br>Description: POLR2A (ENC SR000FAW-1, motif 1)<br>Possible TFs: POLR2A                                                                                                                                                                                        | 3.21040 |  |  | <a href="#">link</a> | <a href="#">link</a>     | PWMs     |
| 368 | <input type="checkbox"/> | hocomoco__KLF3_HUMAN.H11MO.0.B<br>Description: KLF3_HUMAN<br>Possible TFs: KLF3                                                                                                                                                                                                                    | 3.20981 |  |  | <a href="#">link</a> | <a href="#">link</a>     | PWMs     |
| 369 | <input type="checkbox"/> | transfac_pro__M05139<br>Description: P\$AT5G07310_01: At5g07310                                                                                                                                                                                                                                    | 3.20773 |  |  | <a href="#">link</a> | <a href="#">link</a>     | PWMs     |
| 370 | <input type="checkbox"/> | cisbp__M0319<br>Description: CrebB-17A[ gene ID: "FBgn0014467" species: "Drosophila melanogaster" TF status: "inferred" TF family: "bZIP" DBDs: "bZIP_1"]; Crem[ gene ID: "ENSMUSG00000063889" species: "Mus musculus" TF status: "direct" TF family: "bZIP" DBDs: "bZIP_1"]<br>Possible TFs: CREM | 3.20745 |  |  | <a href="#">link</a> | <a href="#">link</a>     | PWMs     |

|     |                                                                                                                                                               |         |                                                                                     |                                                                                      | All                  |                      | Database    |
|-----|---------------------------------------------------------------------------------------------------------------------------------------------------------------|---------|-------------------------------------------------------------------------------------|--------------------------------------------------------------------------------------|----------------------|----------------------|-------------|
| #   | Feature                                                                                                                                                       | NES     | Logo                                                                                | Recovery Curve                                                                       | Candidate targets    | regions in top 20000 |             |
| 371 | <input type="checkbox"/> ENCF001SOX<br>Description: DNase-seq on embryonic human myoblast (HSMM)                                                              | 3.20717 |    |    | <a href="#">link</a> | <a href="#">link</a> | DHS & FAIRE |
| 372 | <input type="checkbox"/> dbcorrdB_POLR2A_ENCSR000BJM_1__m1<br>Description: POLR2A (ENCSR000BJM-1, motif 1)<br>Possible TFs: POLR2A                            | 3.20603 |    |    | <a href="#">link</a> | <a href="#">link</a> | PWMs        |
| 373 | <input type="checkbox"/> transfac_pro_M04869<br>Description: V\$EGR1_11: Egr-1<br>Possible TFs: EGR1                                                          | 3.20383 |    |    | <a href="#">link</a> | <a href="#">link</a> | PWMs        |
| 374 | <input type="checkbox"/> flyfactorsurvey__CG3065_F1-3_SANGER_2.5_FBgn0034946<br>Description: CG3065_F1-3_SANGER_2.5_FBgn0034946<br>Possible TFs: KLF18, KLF17 | 3.20371 |    |    | <a href="#">link</a> | <a href="#">link</a> | PWMs        |
| 375 | <input type="checkbox"/> transfac_pro_M02091<br>Description: V\$E4F1_Q6_01: E4F1<br>Possible TFs: E4F1                                                        | 3.20336 |    |    | <a href="#">link</a> | <a href="#">link</a> | PWMs        |
| 376 | <input type="checkbox"/> transfac_pro_M05099<br>Description: P\$AT5G11190_01: At5g11190                                                                       | 3.20267 |    |    | <a href="#">link</a> | <a href="#">link</a> | PWMs        |
| 377 | <input type="checkbox"/> dbcorrdB_ZMIZ1_ENCSR000EFQ_1__m1<br>Description: ZMIZ1 (ENCSR000EFQ-1, motif 1)<br>Possible TFs: ZMIZ1                               | 3.20251 |   |   | <a href="#">link</a> | <a href="#">link</a> | PWMs        |
| 378 | <input type="checkbox"/> cisbp_M1548<br>Description: M1548                                                                                                    | 3.20153 |  |  | <a href="#">link</a> | <a href="#">link</a> | PWMs        |
| 379 | <input type="checkbox"/> jaspar_MA0976.1<br>Description: CRF4                                                                                                 | 3.20073 |  |  | <a href="#">link</a> | <a href="#">link</a> | PWMs        |
| 380 | <input type="checkbox"/> elemento_CCGCCGC<br>Description: Conserved regulatory element CCGCCGC between Hs and Mm                                              | 3.20059 |  |  | <a href="#">link</a> | <a href="#">link</a> | PWMs        |

|     |                                                                                                                                                                                                                                                                                                                                                                                                                                                                                                                                                                                                                                                                                                                                                                                                                                                                                                                                                                                                                                                                                                                                                                                                                                                                                                                                                                                                                                                                                                                                                                                                                                                                                                                                                                                                                                                                                                                                                                                                                                                                                                                                                                                                                                                                                            |         |                                                                                     |                                                                                      | All                  |                      |          |
|-----|--------------------------------------------------------------------------------------------------------------------------------------------------------------------------------------------------------------------------------------------------------------------------------------------------------------------------------------------------------------------------------------------------------------------------------------------------------------------------------------------------------------------------------------------------------------------------------------------------------------------------------------------------------------------------------------------------------------------------------------------------------------------------------------------------------------------------------------------------------------------------------------------------------------------------------------------------------------------------------------------------------------------------------------------------------------------------------------------------------------------------------------------------------------------------------------------------------------------------------------------------------------------------------------------------------------------------------------------------------------------------------------------------------------------------------------------------------------------------------------------------------------------------------------------------------------------------------------------------------------------------------------------------------------------------------------------------------------------------------------------------------------------------------------------------------------------------------------------------------------------------------------------------------------------------------------------------------------------------------------------------------------------------------------------------------------------------------------------------------------------------------------------------------------------------------------------------------------------------------------------------------------------------------------------|---------|-------------------------------------------------------------------------------------|--------------------------------------------------------------------------------------|----------------------|----------------------|----------|
| #   | Feature                                                                                                                                                                                                                                                                                                                                                                                                                                                                                                                                                                                                                                                                                                                                                                                                                                                                                                                                                                                                                                                                                                                                                                                                                                                                                                                                                                                                                                                                                                                                                                                                                                                                                                                                                                                                                                                                                                                                                                                                                                                                                                                                                                                                                                                                                    | NES     | Logo                                                                                | Recovery Curve                                                                       | Candidate targets    | regions in top 20000 | Database |
|     | <div><input type="checkbox"/> cisbp__M0401</div> <div>Description: SP5[<b>gene ID:</b> "ENSG00000204335" <b>species:</b> "Homo sapiens" <b>TF status:</b> "inferred" <b>TF family:</b> "C2H2 ZF" <b>DBDs:</b> "zf-C2H2"]; SP6[<b>gene ID:</b> "ENSG00000189120" <b>species:</b> "Homo sapiens" <b>TF status:</b> "inferred" <b>TF family:</b> "C2H2 ZF" <b>DBDs:</b> "zf-C2H2"]; SP7[<b>gene ID:</b> "ENSG00000170374" <b>species:</b> "Homo sapiens" <b>TF status:</b> "inferred" <b>TF family:</b> "C2H2 ZF" <b>DBDs:</b> "zf-C2H2"]; SP9[<b>gene ID:</b> "ENSG00000217236" <b>species:</b> "Homo sapiens" <b>TF status:</b> "inferred" <b>TF family:</b> "C2H2 ZF" <b>DBDs:</b> "zf-C2H2"]; Sp2[<b>gene ID:</b> "ENSMUSG00000018678" <b>species:</b> "Mus musculus" <b>TF status:</b> "inferred" <b>TF family:</b> "C2H2 ZF" <b>DBDs:</b> "zf-C2H2"]; Sp3[<b>gene ID:</b> "ENSMUSG00000027109" <b>species:</b> "Mus musculus" <b>TF status:</b> "inferred" <b>TF family:</b> "C2H2 ZF" <b>DBDs:</b> "zf-C2H2"]; Sp4[<b>gene ID:</b> "ENSMUSG00000025323" <b>species:</b> "Mus musculus" <b>TF status:</b> "direct" <b>TF family:</b> "C2H2 ZF" <b>DBDs:</b> "zf-C2H2"]; Sp5[<b>gene ID:</b> "ENSMUSG000000075304" <b>species:</b> "Mus musculus" <b>TF status:</b> "inferred" <b>TF family:</b> "C2H2 ZF" <b>DBDs:</b> "zf-C2H2"]; Sp6[<b>gene ID:</b> "ENSMUSG00000038560" <b>species:</b> "Mus musculus" <b>TF status:</b> "inferred" <b>TF family:</b> "C2H2 ZF" <b>DBDs:</b> "zf-C2H2"]; Sp7[<b>gene ID:</b> "ENSMUSG00000060284" <b>species:</b> "Mus musculus" <b>TF status:</b> "inferred" <b>TF family:</b> "C2H2 ZF" <b>DBDs:</b> "zf-C2H2"]; Sp8[<b>gene ID:</b> "ENSMUSG00000048562" <b>species:</b> "Mus musculus" <b>TF status:</b> "inferred" <b>TF family:</b> "C2H2 ZF" <b>DBDs:</b> "zf-C2H2"]; Sp9[<b>gene ID:</b> "ENSMUSG00000068859" <b>species:</b> "Mus musculus" <b>TF status:</b> "inferred" <b>TF family:</b> "C2H2 ZF" <b>DBDs:</b> "zf-C2H2"]<br/>Possible TFs: SP4</div> <td>3.19772</td> <td>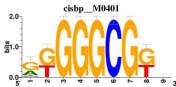</td> <td></td> <td><a href="#">link</a></td> <td><a href="#">link</a></td> <td>PWMs</td> | 3.19772 |    |    | <a href="#">link</a> | <a href="#">link</a> | PWMs     |
| 382 | <div><input type="checkbox"/> transfac_pro__M05044</div> <div>Description: P\$ERF1B_03: ERF1B</div>                                                                                                                                                                                                                                                                                                                                                                                                                                                                                                                                                                                                                                                                                                                                                                                                                                                                                                                                                                                                                                                                                                                                                                                                                                                                                                                                                                                                                                                                                                                                                                                                                                                                                                                                                                                                                                                                                                                                                                                                                                                                                                                                                                                        | 3.19548 |  |  | <a href="#">link</a> | <a href="#">link</a> | PWMs     |
| 383 | <div><input type="checkbox"/> jasper__MA0375.1</div> <div>Description: RSC30</div>                                                                                                                                                                                                                                                                                                                                                                                                                                                                                                                                                                                                                                                                                                                                                                                                                                                                                                                                                                                                                                                                                                                                                                                                                                                                                                                                                                                                                                                                                                                                                                                                                                                                                                                                                                                                                                                                                                                                                                                                                                                                                                                                                                                                         | 3.19548 |  |  | <a href="#">link</a> | <a href="#">link</a> | PWMs     |
| 384 | <div><input type="checkbox"/> transfac_pro__M01899</div> <div>Description: F\$RSC30_02: Rsc30p</div>                                                                                                                                                                                                                                                                                                                                                                                                                                                                                                                                                                                                                                                                                                                                                                                                                                                                                                                                                                                                                                                                                                                                                                                                                                                                                                                                                                                                                                                                                                                                                                                                                                                                                                                                                                                                                                                                                                                                                                                                                                                                                                                                                                                       | 3.19505 |  |  | <a href="#">link</a> | <a href="#">link</a> | PWMs     |
| 385 | <div><input type="checkbox"/> cisbp__M4838</div> <div>Description: CG3065[<b>gene ID:</b> "FBgn0034946" <b>species:</b> "Drosophila melanogaster" <b>TF status:</b> "direct" <b>TF family:</b> "C2H2 ZF" <b>DBDs:</b> "zf-C2H2"]<br/>Possible TFs: KLF18, KLF17</div>                                                                                                                                                                                                                                                                                                                                                                                                                                                                                                                                                                                                                                                                                                                                                                                                                                                                                                                                                                                                                                                                                                                                                                                                                                                                                                                                                                                                                                                                                                                                                                                                                                                                                                                                                                                                                                                                                                                                                                                                                      | 3.19339 |  |  | <a href="#">link</a> | <a href="#">link</a> | PWMs     |
| 386 | <div><input type="checkbox"/> cisbp__M3090</div> <div>Description: CREB1[<b>gene ID:</b> "ENSG00000118260" <b>species:</b> "Homo sapiens" <b>TF status:</b> "direct" <b>TF family:</b> "bZIP" <b>DBDs:</b> "bZIP_1"]; CrebB-17A[<b>gene ID:</b> "FBgn0014467" <b>species:</b> "Drosophila melanogaster" <b>TF status:</b> "inferred" <b>TF family:</b> "bZIP" <b>DBDs:</b> "bZIP_1"]<br/>Possible TFs: CREB1</div>                                                                                                                                                                                                                                                                                                                                                                                                                                                                                                                                                                                                                                                                                                                                                                                                                                                                                                                                                                                                                                                                                                                                                                                                                                                                                                                                                                                                                                                                                                                                                                                                                                                                                                                                                                                                                                                                         | 3.19196 |  |  | <a href="#">link</a> | <a href="#">link</a> | PWMs     |
| 387 | <div><input type="checkbox"/> homer__CTGCGCATGCGC_NRF1</div> <div>Description: NRF1(NRF)/MCF7-NRF1-ChIP-Seq(Unpublished)/Homer<br/>Possible TFs: NRF1</div>                                                                                                                                                                                                                                                                                                                                                                                                                                                                                                                                                                                                                                                                                                                                                                                                                                                                                                                                                                                                                                                                                                                                                                                                                                                                                                                                                                                                                                                                                                                                                                                                                                                                                                                                                                                                                                                                                                                                                                                                                                                                                                                                | 3.19057 |  |  | <a href="#">link</a> | <a href="#">link</a> | PWMs     |

|     |                                                                                                                                                                                                                                                                                                                                                                                                                                                                                                                                                                                                                                                                                                                                                                                                                                                                                                                                                                                                                                                                                                                                                                                                                                                                                                                                                                                                                                                                                                                                                                                                                                                                                                                                                                                                                    |         |                                                                                     |                                                                                      | All                  |                      |          |
|-----|--------------------------------------------------------------------------------------------------------------------------------------------------------------------------------------------------------------------------------------------------------------------------------------------------------------------------------------------------------------------------------------------------------------------------------------------------------------------------------------------------------------------------------------------------------------------------------------------------------------------------------------------------------------------------------------------------------------------------------------------------------------------------------------------------------------------------------------------------------------------------------------------------------------------------------------------------------------------------------------------------------------------------------------------------------------------------------------------------------------------------------------------------------------------------------------------------------------------------------------------------------------------------------------------------------------------------------------------------------------------------------------------------------------------------------------------------------------------------------------------------------------------------------------------------------------------------------------------------------------------------------------------------------------------------------------------------------------------------------------------------------------------------------------------------------------------|---------|-------------------------------------------------------------------------------------|--------------------------------------------------------------------------------------|----------------------|----------------------|----------|
| #   | Feature                                                                                                                                                                                                                                                                                                                                                                                                                                                                                                                                                                                                                                                                                                                                                                                                                                                                                                                                                                                                                                                                                                                                                                                                                                                                                                                                                                                                                                                                                                                                                                                                                                                                                                                                                                                                            | NES     | Logo                                                                                | Recovery Curve                                                                       | Candidate targets    | regions in top 20000 | Database |
| 388 | <input type="checkbox"/> transfac_pro_M09026<br>Description: P\$AT1G28160_02: AT1G28160                                                                                                                                                                                                                                                                                                                                                                                                                                                                                                                                                                                                                                                                                                                                                                                                                                                                                                                                                                                                                                                                                                                                                                                                                                                                                                                                                                                                                                                                                                                                                                                                                                                                                                                            | 3.19012 | 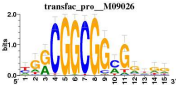   |    | <a href="#">link</a> | <a href="#">link</a> | PWMs     |
| 389 | <input type="checkbox"/> transfac_pro_M09578<br>Description: P\$RAP23_05: RAP2-3                                                                                                                                                                                                                                                                                                                                                                                                                                                                                                                                                                                                                                                                                                                                                                                                                                                                                                                                                                                                                                                                                                                                                                                                                                                                                                                                                                                                                                                                                                                                                                                                                                                                                                                                   | 3.18935 |    |    | <a href="#">link</a> | <a href="#">link</a> | PWMs     |
| 390 | <input type="checkbox"/> cisbp_M0265<br>Description: M0265                                                                                                                                                                                                                                                                                                                                                                                                                                                                                                                                                                                                                                                                                                                                                                                                                                                                                                                                                                                                                                                                                                                                                                                                                                                                                                                                                                                                                                                                                                                                                                                                                                                                                                                                                         | 3.18616 |    |    | <a href="#">link</a> | <a href="#">link</a> | PWMs     |
| 391 | <input type="checkbox"/> transfac_pro_M04703<br>Description: V\$ETS1_05: c-ets-1<br>Possible TFs: ETS1                                                                                                                                                                                                                                                                                                                                                                                                                                                                                                                                                                                                                                                                                                                                                                                                                                                                                                                                                                                                                                                                                                                                                                                                                                                                                                                                                                                                                                                                                                                                                                                                                                                                                                             | 3.18561 |    |    | <a href="#">link</a> | <a href="#">link</a> | PWMs     |
| 392 | <input type="checkbox"/> dbcorrdB__ELF1__ENCSR000BPT_1__m2<br>Description: ELF1 (ENCSR000BPT-1, motif 2)<br>Possible TFs: ELF1                                                                                                                                                                                                                                                                                                                                                                                                                                                                                                                                                                                                                                                                                                                                                                                                                                                                                                                                                                                                                                                                                                                                                                                                                                                                                                                                                                                                                                                                                                                                                                                                                                                                                     | 3.18553 |    |    | <a href="#">link</a> | <a href="#">link</a> | PWMs     |
| 393 | <input type="checkbox"/> transfac_pro_M01253<br>Description: V\$CNOT3_01: CNOT3<br>Possible TFs: CNOT3                                                                                                                                                                                                                                                                                                                                                                                                                                                                                                                                                                                                                                                                                                                                                                                                                                                                                                                                                                                                                                                                                                                                                                                                                                                                                                                                                                                                                                                                                                                                                                                                                                                                                                             | 3.18516 |    |    | <a href="#">link</a> | <a href="#">link</a> | PWMs     |
| 394 | <input type="checkbox"/> transfac_pro_M05026<br>Description: P\$DREB1A_01: DREB1A                                                                                                                                                                                                                                                                                                                                                                                                                                                                                                                                                                                                                                                                                                                                                                                                                                                                                                                                                                                                                                                                                                                                                                                                                                                                                                                                                                                                                                                                                                                                                                                                                                                                                                                                  | 3.18448 |  |  | <a href="#">link</a> | <a href="#">link</a> | PWMs     |
| 395 | <input type="checkbox"/> cisbp_M4473<br>Description: AL662830.5[ <i>gene ID</i> : "ENSG00000237344" <i>species</i> : "Homo sapiens" <i>TF status</i> : "inferred" <i>TF family</i> : "Homeodomain" <i>DBDs</i> : "Homeobox"]; AL845464.3[ <i>gene ID</i> : "ENSG00000206315" <i>species</i> : "Homo sapiens" <i>TF status</i> : "inferred" <i>TF family</i> : "Homeodomain" <i>DBDs</i> : "Homeobox"]; BX284686.1[ <i>gene ID</i> : "ENSG00000224952" <i>species</i> : "Homo sapiens" <i>TF status</i> : "inferred" <i>TF family</i> : "Homeodomain" <i>DBDs</i> : "Homeobox"]; BX927239.6[ <i>gene ID</i> : "ENSG00000232005" <i>species</i> : "Homo sapiens" <i>TF status</i> : "inferred" <i>TF family</i> : "Homeodomain" <i>DBDs</i> : "Homeobox"]; CR812478.2[ <i>gene ID</i> : "ENSG00000225987" <i>species</i> : "Homo sapiens" <i>TF status</i> : "inferred" <i>TF family</i> : "Homeodomain" <i>DBDs</i> : "Homeobox"]; CR933878.8[ <i>gene ID</i> : "ENSG00000236353" <i>species</i> : "Homo sapiens" <i>TF status</i> : "inferred" <i>TF family</i> : "Homeodomain" <i>DBDs</i> : "Homeobox"]; PBX3[ <i>gene ID</i> : "ENSG00000167081" <i>species</i> : "Homo sapiens" <i>TF status</i> : "direct" <i>TF family</i> : "Homeodomain" <i>DBDs</i> : "Homeobox"]; Pbx2[ <i>gene ID</i> : "ENSMUSG00000034673" <i>species</i> : "Mus musculus" <i>TF status</i> : "inferred" <i>TF family</i> : "Homeodomain" <i>DBDs</i> : "Homeobox"]; Pbx3[ <i>gene ID</i> : "ENSMUSG00000038718" <i>species</i> : "Mus musculus" <i>TF status</i> : "inferred" <i>TF family</i> : "Homeodomain" <i>DBDs</i> : "Homeobox"]; Pbx4[ <i>gene ID</i> : "ENSMUSG00000031860" <i>species</i> : "Mus musculus" <i>TF status</i> : "inferred" <i>TF family</i> : "Homeodomain" <i>DBDs</i> : "Homeobox"]<br>Possible TFs: PBX3 | 3.18159 |  |  | <a href="#">link</a> | <a href="#">link</a> | PWMs     |

39/49



| #   | Feature                                                                                                                                                                       | NES     | Logo                                                                                | Recovery Curve                                                                       | Candidate targets    | All regions in top 20000 | Database |
|-----|-------------------------------------------------------------------------------------------------------------------------------------------------------------------------------|---------|-------------------------------------------------------------------------------------|--------------------------------------------------------------------------------------|----------------------|--------------------------|----------|
| 408 | <input type="checkbox"/> elemento__CGCCGCC<br>Description: Conserved regulatory element CGCCGCC between Dmel and Dpse; Conserved regulatory element CGCCGCC between Hs and Mm | 3.16192 | 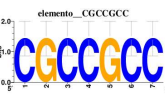   |    | <a href="#">link</a> | <a href="#">link</a>     | PWMs     |
| 409 | <input type="checkbox"/> swissregulon__sacCer__RDS1<br>Description: sacCer__RDS1                                                                                              | 3.15898 |    |    | <a href="#">link</a> | <a href="#">link</a>     | PWMs     |
| 410 | <input type="checkbox"/> transfac_pro__M04973<br>Description: P\$PTI5_01: Pti5                                                                                                | 3.15801 |    |    | <a href="#">link</a> | <a href="#">link</a>     | PWMs     |
| 411 | <input type="checkbox"/> hdpi__SMAP1L<br>Description: SMAP1L<br>Possible TFs: SMAP2                                                                                           | 3.15581 |    |    | <a href="#">link</a> | <a href="#">link</a>     | PWMs     |
| 412 | <input type="checkbox"/> jaspasr__MA0079.3<br>Description: SP1<br>Possible TFs: SP1                                                                                           | 3.15574 |    |    | <a href="#">link</a> | <a href="#">link</a>     | PWMs     |
| 413 | <input type="checkbox"/> taipale_cyt_meth__CREB1__NRTGACGTCAYN_eDBD<br>Description: CREB1 [bZIP]<br>Possible TFs: CREB1                                                       | 3.15502 |    |   | <a href="#">link</a> | <a href="#">link</a>     | PWMs     |
| 414 | <input type="checkbox"/> dbcorrd__ATF1__ENCSR000DNZ_1_m2<br>Description: ATF1 (ENCSR000DNZ-1, motif 2)<br>Possible TFs: ATF1                                                  | 3.15422 |  |  | <a href="#">link</a> | <a href="#">link</a>     | PWMs     |
| 415 | <input type="checkbox"/> dbcorrd__HA-E2F1__ENCSR000EVM_1_m1<br>Description: HA-E2F1 (ENCSR000EVM-1, motif 1)<br>Possible TFs: E2F1                                            | 3.15412 |  |  | <a href="#">link</a> | <a href="#">link</a>     | PWMs     |
| 416 | <input type="checkbox"/> transfac_pro__M05014<br>Description: P\$AT5G25390_01: At5g25390                                                                                      | 3.15215 |  |  | <a href="#">link</a> | <a href="#">link</a>     | PWMs     |
| 417 | <input type="checkbox"/> yetfasco__YML076C_325<br>Description: YML076C_325                                                                                                    | 3.15144 |  |  | <a href="#">link</a> | <a href="#">link</a>     | PWMs     |
| 418 | <input type="checkbox"/> fantom__motif65_TNGCGA<br>Description: DENOVO_SCANALL_HUMAN: motif_TNGCGA                                                                            | 3.14857 |  |  | <a href="#">link</a> | <a href="#">link</a>     | PWMs     |
| 419 | <input type="checkbox"/> dbcorrd__POLR2A__ENCSR000EVL_1_m1<br>Description: POLR2A (ENCSR000EVL-1, motif 1)<br>Possible TFs: POLR2A                                            | 3.14739 |  |  | <a href="#">link</a> | <a href="#">link</a>     | PWMs     |
| 420 | <input type="checkbox"/> transfac_pro__M09087<br>Description: P\$PUCHI_01: PUCHI                                                                                              | 3.14128 |  |  | <a href="#">link</a> | <a href="#">link</a>     | PWMs     |

|     |                                                                                                                                                                                                                                                                                                                                                                                                                                                                                                                                                                                 |         |                                                                                     |                                                                                      | All                  |                      | Database              |
|-----|---------------------------------------------------------------------------------------------------------------------------------------------------------------------------------------------------------------------------------------------------------------------------------------------------------------------------------------------------------------------------------------------------------------------------------------------------------------------------------------------------------------------------------------------------------------------------------|---------|-------------------------------------------------------------------------------------|--------------------------------------------------------------------------------------|----------------------|----------------------|-----------------------|
| #   | Feature                                                                                                                                                                                                                                                                                                                                                                                                                                                                                                                                                                         | NES     | Logo                                                                                | Recovery Curve                                                                       | Candidate targets    | regions in top 20000 |                       |
| 421 | <input type="checkbox"/> E126-H4K20me1-broadpeak<br>Description: H4K20me1 in NHDF-Ad Adult Dermal Fibroblast Primary Cells (E126, broadpeak)                                                                                                                                                                                                                                                                                                                                                                                                                                    | 3.14108 |                                                                                     | 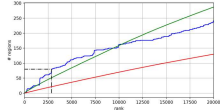   | <a href="#">link</a> | <a href="#">link</a> | Histone modifications |
| 422 | <input type="checkbox"/> transfac_pro__M09053<br>Description: P\$AT1G68550_02: AT1G68550                                                                                                                                                                                                                                                                                                                                                                                                                                                                                        | 3.14012 |    |    | <a href="#">link</a> | <a href="#">link</a> | PWMs                  |
| 423 | <input type="checkbox"/> cisbp__M1806<br>Description: CHA4[ <i>gene ID: "YLR098C" species: "Saccharomyces cerevisiae" TF status: "direct" TF family: "Zinc cluster" DBDs: "Zn_clus"]</i>                                                                                                                                                                                                                                                                                                                                                                                        | 3.13987 |    |    | <a href="#">link</a> | <a href="#">link</a> | PWMs                  |
| 424 | <input type="checkbox"/> cisbp__M1547<br>Description: M1547                                                                                                                                                                                                                                                                                                                                                                                                                                                                                                                     | 3.13904 |    |    | <a href="#">link</a> | <a href="#">link</a> | PWMs                  |
| 425 | <input type="checkbox"/> dbcorrd__POLR2A__ENCSR000EBC_1__m1<br>Description: POLR2A (ENCSR000EBC-1, motif 1)<br>Possible TFs: POLR2A                                                                                                                                                                                                                                                                                                                                                                                                                                             | 3.13498 |    |    | <a href="#">link</a> | <a href="#">link</a> | PWMs                  |
| 426 | <input type="checkbox"/> transfac_pro__M05144<br>Description: P\$AT1G49120_01: At1g49120                                                                                                                                                                                                                                                                                                                                                                                                                                                                                        | 3.12744 |    |    | <a href="#">link</a> | <a href="#">link</a> | PWMs                  |
| 427 | <input type="checkbox"/> transfac_pro__M07514<br>Description: P\$RRTF1_02: RRTF1                                                                                                                                                                                                                                                                                                                                                                                                                                                                                                | 3.12631 |  |  | <a href="#">link</a> | <a href="#">link</a> | PWMs                  |
| 428 | <input type="checkbox"/> dbcorrd__POLR2A__ENCSR000DKM_1__m1<br>Description: POLR2A (ENCSR000DKM-1, motif 1)<br>Possible TFs: POLR2A                                                                                                                                                                                                                                                                                                                                                                                                                                             | 3.12339 |  |  | <a href="#">link</a> | <a href="#">link</a> | PWMs                  |
| 429 | <input type="checkbox"/> ENCF001VZY<br>Description: DNase-seq on human HFF                                                                                                                                                                                                                                                                                                                                                                                                                                                                                                      | 3.12272 |                                                                                     |  | <a href="#">link</a> | <a href="#">link</a> | DHS & FAIRE           |
| 430 | <input type="checkbox"/> cisbp__M5593<br>Description: KLF16[ <i>gene ID: "ENSG00000129911" species: "Homo sapiens" TF status: "direct" TF family: "C2H2 ZF" DBDs: "zf-C2H2"; Klf11[gene ID: "ENSMUSG00000020653" species: "Mus musculus" TF status: "inferred" TF family: "C2H2 ZF" DBDs: "zf-C2H2"; Klf13[gene ID: "ENSMUSG00000052040" species: "Mus musculus" TF status: "inferred" TF family: "C2H2 ZF" DBDs: "zf-C2H2"; Klf14[gene ID: "ENSMUSG00000073209" species: "Mus musculus" TF status: "inferred" TF family: "C2H2 ZF" DBDs: "zf-C2H2"]</i><br>Possible TFs: KLF16 | 3.12183 |  |  | <a href="#">link</a> | <a href="#">link</a> | PWMs                  |
| 431 | <input type="checkbox"/> scertf__badis.RSC30<br>Description: badis.RSC30                                                                                                                                                                                                                                                                                                                                                                                                                                                                                                        | 3.11860 |  |  | <a href="#">link</a> | <a href="#">link</a> | PWMs                  |
| 432 | <input type="checkbox"/> dbcorrd__POLR2A__ENCSR000FAL_1__m1<br>Description: POLR2A (ENCSR000FAL-1, motif 1)<br>Possible TFs: POLR2A                                                                                                                                                                                                                                                                                                                                                                                                                                             | 3.11503 |  |  | <a href="#">link</a> | <a href="#">link</a> | PWMs                  |

| #   | Feature                                                                                                                                                                                                                       | NES     | Logo | Recovery Curve | Candidate targets    | All regions in top 20000 | Database |
|-----|-------------------------------------------------------------------------------------------------------------------------------------------------------------------------------------------------------------------------------|---------|------|----------------|----------------------|--------------------------|----------|
| 433 | <div><input type="checkbox"/> cisbp_M4552</div> <div>Description: ATF3[<i>gene ID: "ENSG00000162772"</i> species: "Homo sapiens" TF status: "direct" TF family: "bZIP" DBDs: "bZIP_1"]</div> <div>Possible TFs: ATF3</div>    | 3.11489 |      |                | <a href="#">link</a> | <a href="#">link</a>     | PWMs     |
| 434 | <div><input type="checkbox"/> dbcorrdB_POLR2A_ENCSR000BMR_1__m1</div> <div>Description: POLR2A (ENCSR000BMR-1, motif 1)</div> <div>Possible TFs: POLR2A</div>                                                                 | 3.11307 |      |                | <a href="#">link</a> | <a href="#">link</a>     | PWMs     |
| 435 | <div><input type="checkbox"/> dbcorrdB_ZBTB33_ENCSR000BNY_1__m1</div> <div>Description: ZBTB33 (ENCSR000BNY-1, motif 1)</div> <div>Possible TFs: ZBTB33</div>                                                                 | 3.10969 |      |                | <a href="#">link</a> | <a href="#">link</a>     | PWMs     |
| 436 | <div><input type="checkbox"/> taipale_KLF16_DBD_GCCMCGCCCMC_repr</div> <div>Description: KLF16 monomeric C2H2 DBD</div> <div>Possible TFs: KLF16</div>                                                                        | 3.10954 |      |                | <a href="#">link</a> | <a href="#">link</a>     | PWMs     |
| 437 | <div><input type="checkbox"/> transfac_pro_M09082</div> <div>Description: P\$ESE1_01: ESE1</div>                                                                                                                              | 3.10925 |      |                | <a href="#">link</a> | <a href="#">link</a>     | PWMs     |
| 438 | <div><input type="checkbox"/> dbcorrdB_E2F6_ENCSR000EWJ_1__m2</div> <div>Description: E2F6 (ENCSR000EWJ-1, motif 2)</div> <div>Possible TFs: E2F6</div>                                                                       | 3.10892 |      |                | <a href="#">link</a> | <a href="#">link</a>     | PWMs     |
| 439 | <div><input type="checkbox"/> elemento_ATTGGCCG</div> <div>Description: Conserved regulatory element ATTGGCCG between Hs and Mm</div>                                                                                         | 3.10587 |      |                | <a href="#">link</a> | <a href="#">link</a>     | PWMs     |
| 440 | <div><input type="checkbox"/> cisbp_M0033</div> <div>Description: M0033</div>                                                                                                                                                 | 3.10496 |      |                | <a href="#">link</a> | <a href="#">link</a>     | PWMs     |
| 441 | <div><input type="checkbox"/> cisbp_M1550</div> <div>Description: Gmeb1[<i>gene ID: "ENSMUSG00000028901"</i> species: "Mus musculus" TF status: "direct" TF family: "SAND" DBDs: "SAND"]</div> <div>Possible TFs: GMEB1</div> | 3.10369 |      |                | <a href="#">link</a> | <a href="#">link</a>     | PWMs     |
| 442 | <div><input type="checkbox"/> elemento_GCCGCGC</div> <div>Description: Conserved regulatory element GCCGCGC between Hs and Mm</div>                                                                                           | 3.10239 |      |                | <a href="#">link</a> | <a href="#">link</a>     | PWMs     |
| 443 | <div><input type="checkbox"/> dbcorrdB_POLR2A_ENCSR000EAM_1__m1</div> <div>Description: POLR2A (ENCSR000EAM-1, motif 1)</div> <div>Possible TFs: POLR2A</div>                                                                 | 3.10154 |      |                | <a href="#">link</a> | <a href="#">link</a>     | PWMs     |
| 444 | <div><input type="checkbox"/> dbcorrdB_UBTF_ENCSR000EFW_1__m1</div> <div>Description: UBTF (ENCSR000EFW-1, motif 1)</div> <div>Possible TFs: UBTF</div>                                                                       | 3.09961 |      |                | <a href="#">link</a> | <a href="#">link</a>     | PWMs     |
| 445 | <div><input type="checkbox"/> hocomoco_ATF1_MOUSE.H11MO.0.B</div> <div>Description: ATF1_MOUSE</div> <div>Possible TFs: ATF1</div>                                                                                            | 3.09426 |      |                | <a href="#">link</a> | <a href="#">link</a>     | PWMs     |

| #   | Feature                                                                                                                                                             | NES     | Logo                                                                                | Recovery Curve                                                                       | Candidate targets    | All regions in top 20000 |             |
|-----|---------------------------------------------------------------------------------------------------------------------------------------------------------------------|---------|-------------------------------------------------------------------------------------|--------------------------------------------------------------------------------------|----------------------|--------------------------|-------------|
|     |                                                                                                                                                                     |         |                                                                                     |                                                                                      |                      | Database                 |             |
| 446 | <input type="checkbox"/> dbcorrdB__ATF3__ENCSR000BKC_1__m1<br>Description: ATF3 (ENCSR000BKC-1, motif 1)<br>Possible TFs: ATF3                                      | 3.09390 | 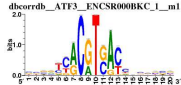   |    | <a href="#">link</a> | <a href="#">link</a>     | PWMs        |
| 447 | <input type="checkbox"/> transfac_pro__M04990<br>Description: P\$DREB2B_01: DREB2B                                                                                  | 3.09303 |    |    | <a href="#">link</a> | <a href="#">link</a>     | PWMs        |
| 448 | <input type="checkbox"/> dbcorrdB__POLR2A__ENCSR000EZA_1__m1<br>Description: POLR2A (ENCSR000EZA-1, motif 1)<br>Possible TFs: POLR2A                                | 3.09013 |    |    | <a href="#">link</a> | <a href="#">link</a>     | PWMs        |
| 449 | <input type="checkbox"/> scertf__badis.CAT8<br>Description: badis.CAT8                                                                                              | 3.08977 |    |    | <a href="#">link</a> | <a href="#">link</a>     | PWMs        |
| 450 | <input type="checkbox"/> elemento__AGCGGCG<br>Description: Conserved regulatory element AGCGGCG between Hs and Mm                                                   | 3.08837 |    |    | <a href="#">link</a> | <a href="#">link</a>     | PWMs        |
| 451 | <input type="checkbox"/> dbcorrdB__ZBTB33__ENCSR000BPZ_1__m1<br>Description: ZBTB33 (ENCSR000BPZ-1, motif 1)<br>Possible TFs: ZBTB33                                | 3.08713 |    |    | <a href="#">link</a> | <a href="#">link</a>     | PWMs        |
| 452 | <input type="checkbox"/> E007-DNase.hotspot.all.peaks-narrowpeak<br>Description: DNase in H1 Derived Neuronal Progenitor Cultured Cells (E007, narrowpeak, hotspot) | 3.08655 |                                                                                     |  | <a href="#">link</a> | <a href="#">link</a>     | DHS & FAIRE |
| 453 | <input type="checkbox"/> cisbp__M0076<br>Description: M0076                                                                                                         | 3.08487 |  |  | <a href="#">link</a> | <a href="#">link</a>     | PWMs        |
| 454 | <input type="checkbox"/> transfac_pro__M09080<br>Description: P\$ERF8_02: ERF8                                                                                      | 3.08443 |  |  | <a href="#">link</a> | <a href="#">link</a>     | PWMs        |
| 455 | <input type="checkbox"/> elemento__CGCCTCC<br>Description: Conserved regulatory element CGCCTCC between Hs and Mm                                                   | 3.08369 |  |  | <a href="#">link</a> | <a href="#">link</a>     | PWMs        |
| 456 | <input type="checkbox"/> elemento__TCGCCGC<br>Description: Conserved regulatory element TCGCCGC between Hs and Mm                                                   | 3.08013 |  |  | <a href="#">link</a> | <a href="#">link</a>     | PWMs        |
| 457 | <input type="checkbox"/> yetfasco__YIL036W_585<br>Description: YIL036W_585                                                                                          | 3.07995 |  |  | <a href="#">link</a> | <a href="#">link</a>     | PWMs        |
| 458 | <input type="checkbox"/> transfac_pro__M01615<br>Description: F\$CST6_01: Cst6p                                                                                     | 3.07837 |  |  | <a href="#">link</a> | <a href="#">link</a>     | PWMs        |

| #   | Feature                                                                                                                                                                | NES     | Logo                                                                                | Recovery Curve                                                                       | Candidate targets    | All regions in top 20000 | Database |
|-----|------------------------------------------------------------------------------------------------------------------------------------------------------------------------|---------|-------------------------------------------------------------------------------------|--------------------------------------------------------------------------------------|----------------------|--------------------------|----------|
| 459 | <input type="checkbox"/> transfac_pro_M00917<br>Description: V\$CREB_Q4_01: CREB<br>Possible TFs: CREM, CREB1                                                          | 3.07830 | 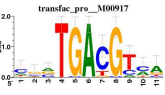   |    | <a href="#">link</a> | <a href="#">link</a>     | PWMs     |
| 460 | <input type="checkbox"/> hocomoco_KAISO_HUMAN.H11MO.0.A<br>Description: KAISO_HUMAN<br>Possible TFs: ZBTB33                                                            | 3.07530 |    |    | <a href="#">link</a> | <a href="#">link</a>     | PWMs     |
| 461 | <input type="checkbox"/> transfac_public_M00178<br>Description: V\$CREB_Q4: CREB<br>Possible TFs: CREB1                                                                | 3.07420 |    |    | <a href="#">link</a> | <a href="#">link</a>     | PWMs     |
| 462 | <input type="checkbox"/> transfac_pro_M04683<br>Description: V\$NFYA_Q2: NF-YA<br>Possible TFs: NFYA                                                                   | 3.07241 |    |    | <a href="#">link</a> | <a href="#">link</a>     | PWMs     |
| 463 | <input type="checkbox"/> jasper_MA0286.1<br>Description: CST6                                                                                                          | 3.07231 |    |    | <a href="#">link</a> | <a href="#">link</a>     | PWMs     |
| 464 | <input type="checkbox"/> cisbp_M2091<br>Description: CST6[gene ID: "YIL036W" species: "Saccharomyces cerevisiae" TF status: "direct" TF family: "bZIP" DBDs: "bZIP_1"] | 3.07036 |    |    | <a href="#">link</a> | <a href="#">link</a>     | PWMs     |
| 465 | <input type="checkbox"/> transfac_pro_M04790<br>Description: V\$E2F6_Q2: E2F-6<br>Possible TFs: E2F6                                                                   | 3.06981 |   |   | <a href="#">link</a> | <a href="#">link</a>     | PWMs     |
| 466 | <input type="checkbox"/> jasper_MA0506.1<br>Description: NRF1<br>Possible TFs: NRF1                                                                                    | 3.06886 |  |  | <a href="#">link</a> | <a href="#">link</a>     | PWMs     |
| 467 | <input type="checkbox"/> cisbp_M4307<br>Description: CST6[gene ID: "YIL036W" species: "Saccharomyces cerevisiae" TF status: "direct" TF family: "bZIP" DBDs: "bZIP_1"] | 3.06684 |  |  | <a href="#">link</a> | <a href="#">link</a>     | PWMs     |
| 468 | <input type="checkbox"/> yetfasco_YLR278C_2112<br>Description: YLR278C_2112                                                                                            | 3.06484 |  |  | <a href="#">link</a> | <a href="#">link</a>     | PWMs     |
| 469 | <input type="checkbox"/> transfac_pro_M01273<br>Description: V\$SP4_Q5: SP4<br>Possible TFs: SP4                                                                       | 3.06476 |  |  | <a href="#">link</a> | <a href="#">link</a>     | PWMs     |
| 470 | <input type="checkbox"/> transfac_pro_M05353<br>Description: V\$KLF14_Q2: Klf14<br>Possible TFs: KLF14                                                                 | 3.06250 |  |  | <a href="#">link</a> | <a href="#">link</a>     | PWMs     |
| 471 | <input type="checkbox"/> jasper_MA1005.1<br>Description: ERF3                                                                                                          | 3.06130 |  |  | <a href="#">link</a> | <a href="#">link</a>     | PWMs     |



| #   | Feature                                                                                                                                                                      | NES     | Logo                                                                                | Recovery Curve                                                                       | Candidate targets    | All Database         |             |
|-----|------------------------------------------------------------------------------------------------------------------------------------------------------------------------------|---------|-------------------------------------------------------------------------------------|--------------------------------------------------------------------------------------|----------------------|----------------------|-------------|
|     |                                                                                                                                                                              |         |                                                                                     |                                                                                      |                      | regions in top 20000 |             |
| 472 | <input type="checkbox"/> transfac_pro_M05140<br>Description: P\$AT4G28140_01: At4g28140                                                                                      | 3.05962 | 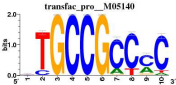   |    | <a href="#">link</a> | <a href="#">link</a> | PWMs        |
| 473 | <input type="checkbox"/> taipale_cyt_meth_ZNF704_NRCCGCCGGYN_FL_meth_repr<br>Description: ZNF704 [Znf_C2H2, CpG-meth]<br>Possible TFs: ZNF704                                | 3.05919 |    |    | <a href="#">link</a> | <a href="#">link</a> | PWMs        |
| 474 | <input type="checkbox"/> transfac_pro_M05013<br>Description: P\$ERF4_02: ERF4                                                                                                | 3.05501 |    |    | <a href="#">link</a> | <a href="#">link</a> | PWMs        |
| 475 | <input type="checkbox"/> transfac_pro_M09084<br>Description: P\$LEP_02: LEP                                                                                                  | 3.05465 |    |    | <a href="#">link</a> | <a href="#">link</a> | PWMs        |
| 476 | <input type="checkbox"/> dbcorrdB_TAF1_ENCSR000BJN_1_m1<br>Description: TAF1 (ENCSR000BJN-1, motif 1)<br>Possible TFs: TAF1                                                  | 3.05429 |    |    | <a href="#">link</a> | <a href="#">link</a> | PWMs        |
| 477 | <input type="checkbox"/> elemento_CGCGCCG<br>Description: Conserved regulatory element CGCGCCG between Hs and Mm                                                             | 3.05031 |    |    | <a href="#">link</a> | <a href="#">link</a> | PWMs        |
| 478 | <input type="checkbox"/> dbcorrdB_POLR2A_ENCSR000DYO_1_m2<br>Description: POLR2A (ENCSR000DYO-1, motif 2)<br>Possible TFs: POLR2A                                            | 3.04638 |  |  | <a href="#">link</a> | <a href="#">link</a> | PWMs        |
| 479 | <input type="checkbox"/> elemento_AGCGCGC<br>Description: Conserved regulatory element AGCGCGC between Dmel and Dpse; Conserved regulatory element AGCGCGC between Hs and Mm | 3.04351 |  |  | <a href="#">link</a> | <a href="#">link</a> | PWMs        |
| 480 | <input type="checkbox"/> ENCF001SPN<br>Description: Duke human ProgFib DNase-seq                                                                                             | 3.04020 |                                                                                     |  | <a href="#">link</a> | <a href="#">link</a> | DHS & FAIRE |
| 481 | <input type="checkbox"/> transfac_public_M00179<br>Description: V\$CREBP1_Q2: ATF2<br>Possible TFs: ATF2                                                                     | 3.03964 |  |  | <a href="#">link</a> | <a href="#">link</a> | PWMs        |
| 482 | <input type="checkbox"/> swissregulon_sacCer_GAL4<br>Description: sacCer_GAL4                                                                                                | 3.03930 |  |  | <a href="#">link</a> | <a href="#">link</a> | PWMs        |

|     |                                                                                                                                                                                                                                                                                                                                                                                                                                                                                                                                                                                                                                                                                                                                                                                                                                                                                                                                                                                                                     | All     |      | Candidate regions |                      | Database             |      |
|-----|---------------------------------------------------------------------------------------------------------------------------------------------------------------------------------------------------------------------------------------------------------------------------------------------------------------------------------------------------------------------------------------------------------------------------------------------------------------------------------------------------------------------------------------------------------------------------------------------------------------------------------------------------------------------------------------------------------------------------------------------------------------------------------------------------------------------------------------------------------------------------------------------------------------------------------------------------------------------------------------------------------------------|---------|------|-------------------|----------------------|----------------------|------|
| #   | Feature                                                                                                                                                                                                                                                                                                                                                                                                                                                                                                                                                                                                                                                                                                                                                                                                                                                                                                                                                                                                             | NES     | Logo | Recovery Curve    | targets              | in top 20000         |      |
|     | <div><input type="checkbox"/> cisbp__M1906</div> <div>Description: SP1[<b>gene ID</b>: "ENSG00000185591" <b>species</b>: "Homo sapiens" <b>TF status</b>: "direct" <b>TF family</b>: "C2H2 ZF" <b>DBDs</b>: "zf-C2H2"]; SP5[<b>gene ID</b>: "ENSG00000204335" <b>species</b>: "Homo sapiens" <b>TF status</b>: "inferred" <b>TF family</b>: "C2H2 ZF" <b>DBDs</b>: "zf-C2H2"]; SP6[<b>gene ID</b>: "ENSG00000189120" <b>species</b>: "Homo sapiens" <b>TF status</b>: "inferred" <b>TF family</b>: "C2H2 ZF" <b>DBDs</b>: "zf-C2H2"]; SP7[<b>gene ID</b>: "ENSG00000170374" <b>species</b>: "Homo sapiens" <b>TF status</b>: "inferred" <b>TF family</b>: "C2H2 ZF" <b>DBDs</b>: "zf-C2H2"]; SP9[<b>gene ID</b>: "ENSG00000217236" <b>species</b>: "Homo sapiens" <b>TF status</b>: "inferred" <b>TF family</b>: "C2H2 ZF" <b>DBDs</b>: "zf-C2H2"]; Sp2[<b>gene ID</b>: "ENSMUSG00000018678" <b>species</b>: "Mus musculus" <b>TF status</b>: "inferred" <b>TF family</b>: "C2H2 ZF" <b>DBDs</b>: "zf-C2H2"];</div> |         |      |                   |                      |                      |      |
| 483 | <div>Sp3[<b>gene ID</b>: "ENSMUSG00000027109" <b>species</b>: "Mus musculus" <b>TF status</b>: "inferred" <b>TF family</b>: "C2H2 ZF" <b>DBDs</b>: "zf-C2H2"]; Sp5[<b>gene ID</b>: "ENSMUSG00000075304" <b>species</b>: "Mus musculus" <b>TF status</b>: "inferred" <b>TF family</b>: "C2H2 ZF" <b>DBDs</b>: "zf-C2H2"]; Sp6[<b>gene ID</b>: "ENSMUSG00000038560" <b>species</b>: "Mus musculus" <b>TF status</b>: "inferred" <b>TF family</b>: "C2H2 ZF" <b>DBDs</b>: "zf-C2H2"]; Sp7[<b>gene ID</b>: "ENSMUSG00000060284" <b>species</b>: "Mus musculus" <b>TF status</b>: "inferred" <b>TF family</b>: "C2H2 ZF" <b>DBDs</b>: "zf-C2H2"]; Sp8[<b>gene ID</b>: "ENSMUSG00000048562" <b>species</b>: "Mus musculus" <b>TF status</b>: "inferred" <b>TF family</b>: "C2H2 ZF" <b>DBDs</b>: "zf-C2H2"]; Sp9[<b>gene ID</b>: "ENSMUSG00000068859" <b>species</b>: "Mus musculus" <b>TF status</b>: "inferred" <b>TF family</b>: "C2H2 ZF" <b>DBDs</b>: "zf-C2H2"]</div> <div>Possible TFs: SP1</div>                  | 3.03838 |      |                   | <a href="#">link</a> | <a href="#">link</a> | PWMs |
| 484 | <div><input type="checkbox"/> cisbp__M6373</div> <div>Description: NFYC[<b>gene ID</b>: "ENSG00000066136" <b>species</b>: "Homo sapiens" <b>TF status</b>: "direct" <b>TF family</b>: "Unknown" <b>DBDs</b>: "UNKNOWN"]</div> <div>Possible TFs: NFYC</div>                                                                                                                                                                                                                                                                                                                                                                                                                                                                                                                                                                                                                                                                                                                                                         | 3.03721 |      |                   | <a href="#">link</a> | <a href="#">link</a> | PWMs |
| 485 | <div><input type="checkbox"/> dbcorrd__SIN3A__ENCSR000BOW_1__m3</div> <div>Description: SIN3A (ENCSR000BOW-1, motif 3)</div> <div>Possible TFs: SIN3A</div>                                                                                                                                                                                                                                                                                                                                                                                                                                                                                                                                                                                                                                                                                                                                                                                                                                                         | 3.03696 |      |                   | <a href="#">link</a> | <a href="#">link</a> | PWMs |
| 486 | <div><input type="checkbox"/> transfac_pro__M05041</div> <div>Description: P\$ERF4_03: ERF4</div>                                                                                                                                                                                                                                                                                                                                                                                                                                                                                                                                                                                                                                                                                                                                                                                                                                                                                                                   | 3.03591 |      |                   | <a href="#">link</a> | <a href="#">link</a> | PWMs |
| 487 | <div><input type="checkbox"/> scertf__macisaac.SWI6</div> <div>Description: macisaac.SWI6</div>                                                                                                                                                                                                                                                                                                                                                                                                                                                                                                                                                                                                                                                                                                                                                                                                                                                                                                                     | 3.03570 |      |                   | <a href="#">link</a> | <a href="#">link</a> | PWMs |
| 488 | <div><input type="checkbox"/> dbcorrd__SREBF1__ENCSR000EZP_1__m1</div> <div>Description: SREBF1 (ENCSR000EZP-1, motif 1)</div> <div>Possible TFs: SREBF1</div>                                                                                                                                                                                                                                                                                                                                                                                                                                                                                                                                                                                                                                                                                                                                                                                                                                                      | 3.03429 |      |                   |                      |                      |      |

| #   | Feature                                                                                                                                                                                   | NES     | Logo                                                                                | Recovery Curve                                                                       | Candidate targets    | All regions in top 20000 | Database    |
|-----|-------------------------------------------------------------------------------------------------------------------------------------------------------------------------------------------|---------|-------------------------------------------------------------------------------------|--------------------------------------------------------------------------------------|----------------------|--------------------------|-------------|
| 491 | <input type="checkbox"/> hdpi__AFF4<br>Description: AFF4<br>Possible TFs: AFF4                                                                                                            | 3.02824 | 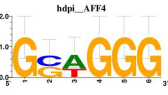   |    | <a href="#">link</a> | <a href="#">link</a>     | PWMs        |
| 492 | <input type="checkbox"/> hocomoco__CREB1_HUMAN.H11MO.0.A<br>Description: CREB1_HUMAN<br>Possible TFs: CREB1                                                                               | 3.02683 |    |    | <a href="#">link</a> | <a href="#">link</a>     | PWMs        |
| 493 | <input type="checkbox"/> taipale_cyt_meth__ATF2_NRTGAYGTMAYN_FL<br>Description: ATF2 [bZIP]<br>Possible TFs: ATF2                                                                         | 3.02622 |    |    | <a href="#">link</a> | <a href="#">link</a>     | PWMs        |
| 494 | <input type="checkbox"/> transfac_pro__M05111<br>Description: P\$AT1G44830_01: At1g44830                                                                                                  | 3.02425 |    |    | <a href="#">link</a> | <a href="#">link</a>     | PWMs        |
| 495 | <input type="checkbox"/> transfac_pro__M05479<br>Description: V\$ZNF580_01: znf580<br>Possible TFs: ZNF580                                                                                | 3.02305 |    |    | <a href="#">link</a> | <a href="#">link</a>     | PWMs        |
| 496 | <input type="checkbox"/> transfac_pro__M01520<br>Description: F\$RSC30_01: Rsc30p                                                                                                         | 3.02278 |    |    | <a href="#">link</a> | <a href="#">link</a>     | PWMs        |
| 497 | <input type="checkbox"/> dbcorrd__POLR2AphosphoS5__ENCSR000BIC_1__m1<br>Description: POLR2AphosphoS5 (ENCSR000BIC-1, motif 1)                                                             | 3.02276 |  |  | <a href="#">link</a> | <a href="#">link</a>     | PWMs        |
| 498 | <input type="checkbox"/> scertf__badis.GSM1<br>Description: badis.GSM1                                                                                                                    | 3.02034 |  |  | <a href="#">link</a> | <a href="#">link</a>     | PWMs        |
| 499 | <input type="checkbox"/> dbcorrd__POLR2A__ENCSR000EAY_1__m1<br>Description: POLR2A (ENCSR000EAY-1, motif 1)<br>Possible TFs: POLR2A                                                       | 3.01969 |  |  | <a href="#">link</a> | <a href="#">link</a>     | PWMs        |
| 500 | <input type="checkbox"/> E080-DNase.hotspot.all.peaks-narrowpeak<br>Description: DNase in Fetal Adrenal Gland (E080, narrowpeak, hotspot)                                                 | 3.01960 |                                                                                     |  | <a href="#">link</a> | <a href="#">link</a>     | DHS & FAIRE |
| 501 | <input type="checkbox"/> taipale_cyt_meth__ZNF704_NRCCGGCCGGYN_FL<br>Description: ZNF704 [Znf_C2H2]<br>Possible TFs: ZNF704                                                               | 3.01876 |  |  | <a href="#">link</a> | <a href="#">link</a>     | PWMs        |
| 502 | <input type="checkbox"/> taipale_cyt_meth__CREB3L4_NRTGACGTCAYN_eDBD<br>Description: CREB3L4 [bZIP]<br>Possible TFs: CREB3L4                                                              | 3.01815 |  |  | <a href="#">link</a> | <a href="#">link</a>     | PWMs        |
| 503 | <input type="checkbox"/> cisbp__M4300<br>Description: RSC30[ <i>gene ID: "YHR056C" species: "Saccharomyces cerevisiae"</i> TF status: "direct" TF family: "Zinc cluster" DBDs: "Zn_clus"] | 3.01772 |  |  | <a href="#">link</a> | <a href="#">link</a>     | PWMs        |

|     |                                                                                                                                                                                                                                                                                                                                                                                                                                                                                                                                                                                                                                                                                                                                                                                                                                                                                                                                                                                                                                                                                                                                                                                                                                                                                                                                                                                                                                                                                                                                                                                                   |         |                                                                                     |                                                                                      | All                  |                      |             |
|-----|---------------------------------------------------------------------------------------------------------------------------------------------------------------------------------------------------------------------------------------------------------------------------------------------------------------------------------------------------------------------------------------------------------------------------------------------------------------------------------------------------------------------------------------------------------------------------------------------------------------------------------------------------------------------------------------------------------------------------------------------------------------------------------------------------------------------------------------------------------------------------------------------------------------------------------------------------------------------------------------------------------------------------------------------------------------------------------------------------------------------------------------------------------------------------------------------------------------------------------------------------------------------------------------------------------------------------------------------------------------------------------------------------------------------------------------------------------------------------------------------------------------------------------------------------------------------------------------------------|---------|-------------------------------------------------------------------------------------|--------------------------------------------------------------------------------------|----------------------|----------------------|-------------|
| #   | Feature                                                                                                                                                                                                                                                                                                                                                                                                                                                                                                                                                                                                                                                                                                                                                                                                                                                                                                                                                                                                                                                                                                                                                                                                                                                                                                                                                                                                                                                                                                                                                                                           | NES     | Logo                                                                                | Recovery Curve                                                                       | Candidate targets    | regions in top 20000 | Database    |
| 504 | <input type="checkbox"/> transfac_pro__M05146<br>Description: P\$LEP_01: LEP                                                                                                                                                                                                                                                                                                                                                                                                                                                                                                                                                                                                                                                                                                                                                                                                                                                                                                                                                                                                                                                                                                                                                                                                                                                                                                                                                                                                                                                                                                                      | 3.01483 | 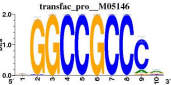   |    | <a href="#">link</a> | <a href="#">link</a> | PWMs        |
| 505 | <input type="checkbox"/> transfac_pro__M01721<br>Description: V\$PUR1_Q4: PUR1<br>Possible TFs: PURA                                                                                                                                                                                                                                                                                                                                                                                                                                                                                                                                                                                                                                                                                                                                                                                                                                                                                                                                                                                                                                                                                                                                                                                                                                                                                                                                                                                                                                                                                              | 3.01192 |    |    | <a href="#">link</a> | <a href="#">link</a> | PWMs        |
| 506 | <input type="checkbox"/> jaspar__MA0470.1<br>Description: E2F4<br>Possible TFs: E2F4                                                                                                                                                                                                                                                                                                                                                                                                                                                                                                                                                                                                                                                                                                                                                                                                                                                                                                                                                                                                                                                                                                                                                                                                                                                                                                                                                                                                                                                                                                              | 3.00875 |    |    | <a href="#">link</a> | <a href="#">link</a> | PWMs        |
| 507 | <input type="checkbox"/> transfac_pro__M09079<br>Description: P\$ERF73_01: ERF73                                                                                                                                                                                                                                                                                                                                                                                                                                                                                                                                                                                                                                                                                                                                                                                                                                                                                                                                                                                                                                                                                                                                                                                                                                                                                                                                                                                                                                                                                                                  | 3.00673 |    |    | <a href="#">link</a> | <a href="#">link</a> | PWMs        |
| 508 | <input type="checkbox"/> ENCF001SPI<br>Description: Duke human Myometr DNase-seq                                                                                                                                                                                                                                                                                                                                                                                                                                                                                                                                                                                                                                                                                                                                                                                                                                                                                                                                                                                                                                                                                                                                                                                                                                                                                                                                                                                                                                                                                                                  | 3.00645 |                                                                                     |    | <a href="#">link</a> | <a href="#">link</a> | DHS & FAIRE |
| 509 | <input type="checkbox"/> dbcorrd__POLR2AphosphoS5__ENCSR000BML_1__m1<br>Description: POLR2AphosphoS5 (ENCSR000BML-1, motif 1)                                                                                                                                                                                                                                                                                                                                                                                                                                                                                                                                                                                                                                                                                                                                                                                                                                                                                                                                                                                                                                                                                                                                                                                                                                                                                                                                                                                                                                                                     | 3.00629 |    |    | <a href="#">link</a> | <a href="#">link</a> | PWMs        |
| 510 | <input type="checkbox"/> transfac_pro__M09065<br>Description: P\$ERF104_02: ERF104                                                                                                                                                                                                                                                                                                                                                                                                                                                                                                                                                                                                                                                                                                                                                                                                                                                                                                                                                                                                                                                                                                                                                                                                                                                                                                                                                                                                                                                                                                                | 3.00567 |  |  | <a href="#">link</a> | <a href="#">link</a> | PWMs        |
| 511 | <input type="checkbox"/> cisbp__M5853<br>Description: SP1[<br>gene ID: "ENSG00000185591" species: "Homo sapiens" TF status: "direct" TF family: "C2H2 ZF" DBDs: "zf-C2H2"]; SP5[<br>gene ID: "ENSG00000204335" species: "Homo sapiens" TF status: "inferred" TF family: "C2H2 ZF" DBDs: "zf-C2H2"]; SP6[<br>gene ID: "ENSG00000189120" species: "Homo sapiens" TF status: "inferred" TF family: "C2H2 ZF" DBDs: "zf-C2H2"]; SP7[<br>gene ID: "ENSG00000170374" species: "Homo sapiens" TF status: "inferred" TF family: "C2H2 ZF" DBDs: "zf-C2H2"]; SP9[<br>gene ID: "ENSG00000217236" species: "Homo sapiens" TF status: "inferred" TF family: "C2H2 ZF" DBDs: "zf-C2H2"]; SP2[<br>gene ID: "ENSMUSG00000018678" species: "Mus musculus" TF status: "inferred" TF family: "C2H2 ZF" DBDs: "zf-C2H2"];<br>Sp3[<br>gene ID: "ENSMUSG000000027109" species: "Mus musculus" TF status: "inferred" TF family: "C2H2 ZF" DBDs: "zf-C2H2"]; Sp5[<br>gene ID: "ENSMUSG00000075304" species: "Mus musculus" TF status: "inferred" TF family: "C2H2 ZF" DBDs: "zf-C2H2"]; Sp6[<br>gene ID: "ENSMUSG00000038560" species: "Mus musculus" TF status: "inferred" TF family: "C2H2 ZF" DBDs: "zf-C2H2"]; Sp7[<br>gene ID: "ENSMUSG000000060284" species: "Mus musculus" TF status: "inferred" TF family: "C2H2 ZF" DBDs: "zf-C2H2"]; Sp8[<br>gene ID: "ENSMUSG00000048562" species: "Mus musculus" TF status: "inferred" TF family: "C2H2 ZF" DBDs: "zf-C2H2"]; Sp9[<br>gene ID: "ENSMUSG00000068859" species: "Mus musculus" TF status: "inferred" TF family: "C2H2 ZF" DBDs: "zf-C2H2"]<br>Possible TFs: SP1 | 3.00307 |  |  | <a href="#">link</a> | <a href="#">link</a> | PWMs        |

| #   | Feature                                                                           | NES     | Logo                                                                              | Recovery Curve                                                                     | All                  |                      |          |
|-----|-----------------------------------------------------------------------------------|---------|-----------------------------------------------------------------------------------|------------------------------------------------------------------------------------|----------------------|----------------------|----------|
|     |                                                                                   |         |                                                                                   |                                                                                    | Candidate targets    | regions in top 20000 | Database |
| 512 | <input type="checkbox"/> transfac_pro__M05048<br>Description: P\$RAP26_02: RAP2-6 | 3.00293 | 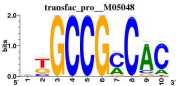 |  | <a href="#">link</a> | <a href="#">link</a> | PWMs     |
