# Supplementary figures and images for: Characterization of Accessible Chromatin Regions in Cattle Rumen Epithelial Tissue during Weaning
Source: MDPI journal article supplement (doi:10.3390/genes13030535), 2022-03-18

Weaning regions over chromosomes

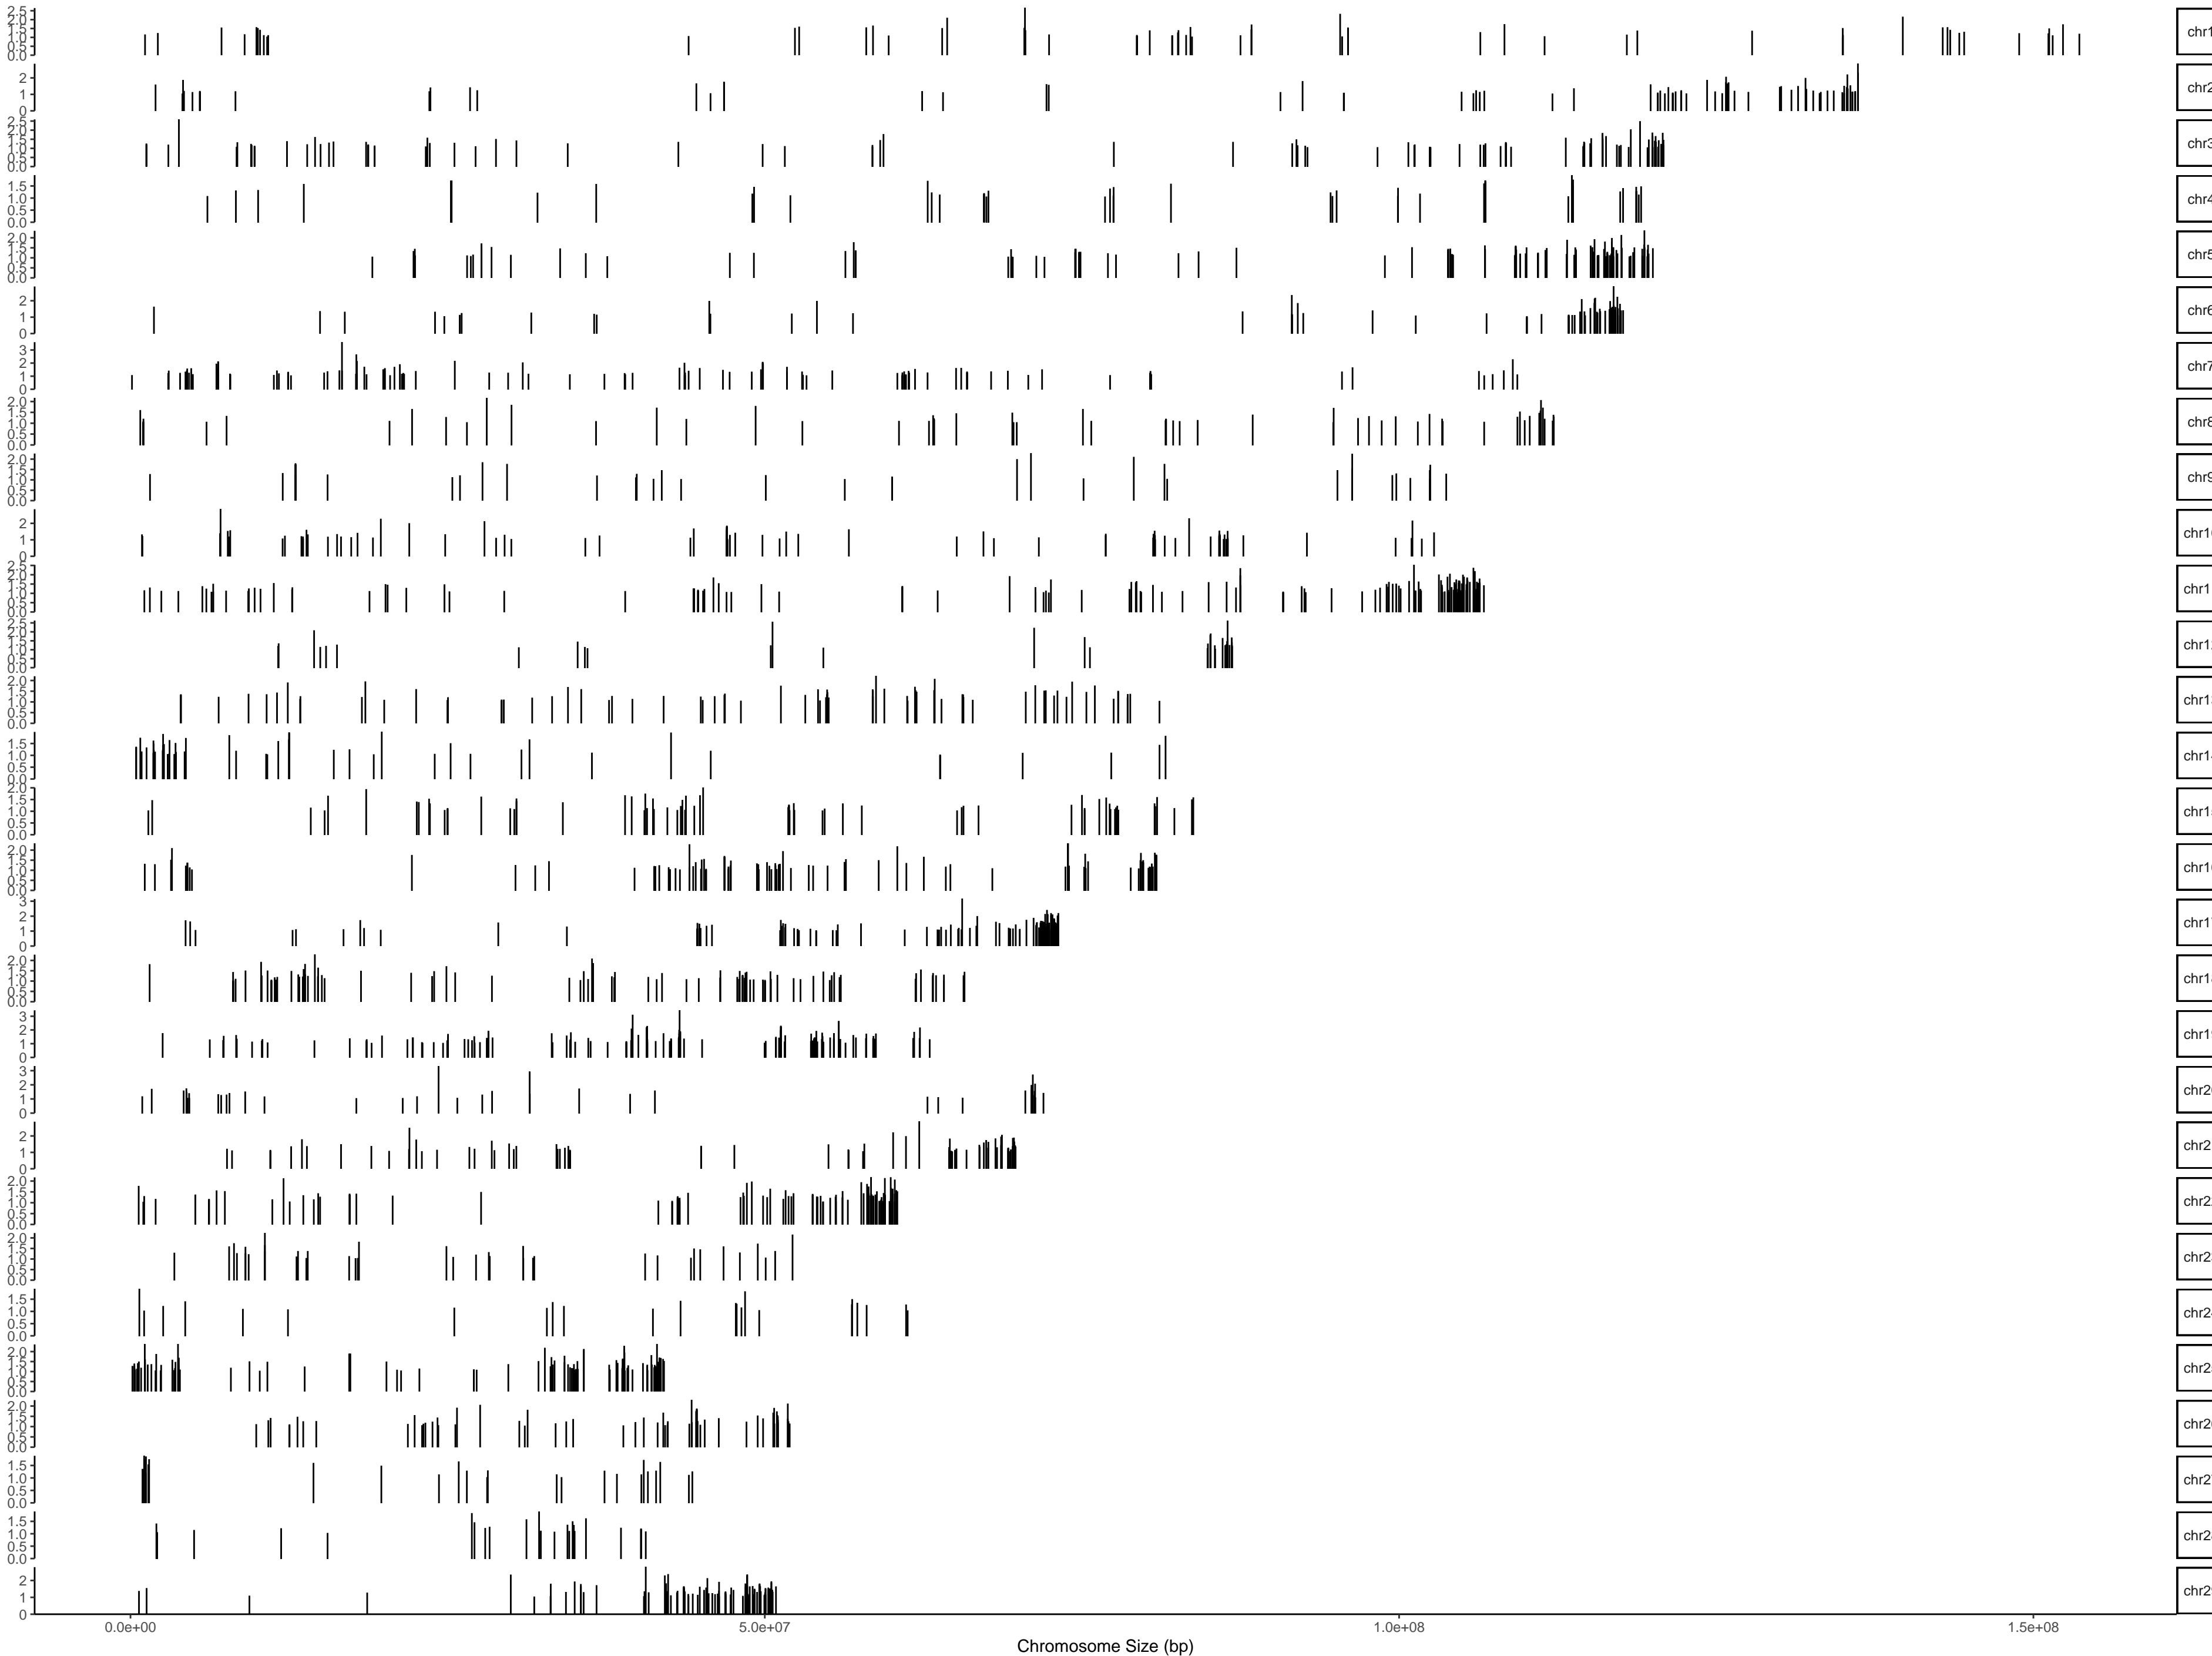

Supplement: s1 [file s1]

# Cluster Dendrogram

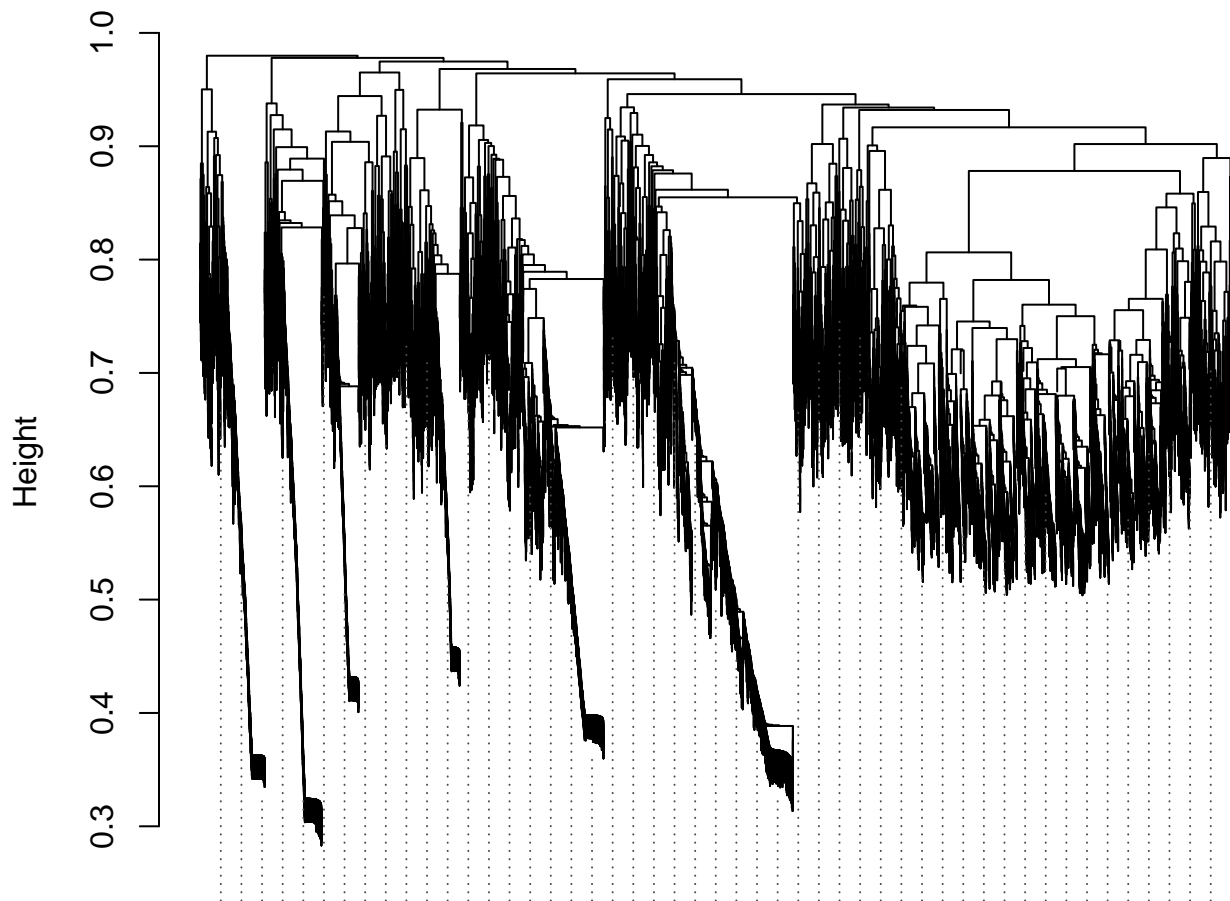

Dynamic Tree Cut

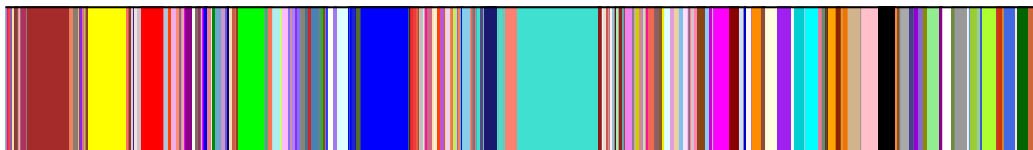

Merged dynamic

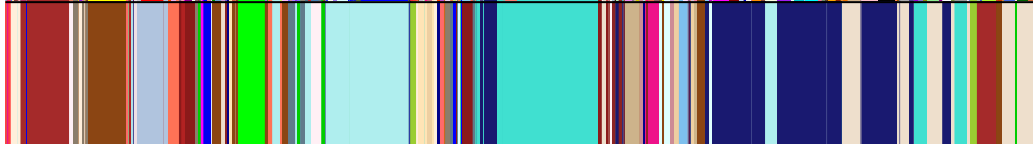

Supplement: s1 [file s1]
